# Supplementary material for: Integrated network pharmacology and in vivo experiments to reveal the anti-inflammatory mechanism of Qinghuo Rougan Formula in uveitis
Source: Front Mol Biosci. 2025 Jul 11;12:1632027. doi: 10.3389/fmolb.2025.1632027 (PMC12289509; doi:10.3389/fmolb.2025.1632027)
Supplement: Supplementary file 2 [file DataSheet1.xlsx]

## Sheet: Table S1
Table S1a: The composition of QHRGF.
Pharmacopoeia of China	Full botanical plant names	Authorities plant names	Weight (g)
Longdan	Coptidis Rhizoma	Coptis chinensis Franch	108
Baishao	Anemarrhenae Rhizoma	Anemarrhena asphodeloides Bunge	120
Huangqin	Cortex Moutan	Paeonia × suffruticosa Andrews	60
Huanglian	Saposhnikoviae Radix	Saposhnikovia divaricata (Turcz. ex Ledeb.) Schischk.	60
Zhizi	Chrysanthemi Flos	Chrysanthemum × morifolium (Ramat.) Hemsl.	60
Danggui	Paeoniae Radix Alba	Paeonia lactiflora Pall.	60
Dihuang	Radix et rhizoma gentianae	Gentiana crassa subsp. rigescens (Franch. ex Hemsl.) Halda	60
Zhimu	Scutellariae Radix	Scutellaria baicalensis Georgi	60
Chaihu	Gardeniae Fructus	Gardenia jasminoides J.Ellis	72
Mudanpi	Radix Bupleuri	Bupleurum chinense DC.	60
Fangfeng	Rehmanniae Radix Praeparata	Rehmannia glutinosa (Gaertn.) DC.	60
Juhua	Angelicae Sinensis Radix	Angelica sinensis (Oliv.) Diels	120
Gancao	Licoric	Glycyrrhiza glabra L.	60
Table_S1b__Reference_Standards
Compound	Standard Source	Batch Number	Purity (%)	Used in Figure/Table
Baicalin	National Institutes for Food and Drug Control (Beijing, China)	110715-201318	>=98.0	Figure 1 / Section 3.1
Geniposide	National Institutes for Food and Drug Control (Beijing, China)	110749-200714	>=98.0	Figure 1 / Section 3.1
Gentiopicroside	National Institutes for Food and Drug Control (Beijing, China)	110770-201515	>=98.0	Figure 1 / Section 3.1
Berberine hydrochloride	Shanghai Standard Reagent Company	STA30701021	>=98.0	Supplementary TLC / Fig S2
Mangiferin	National Institutes for Food and Drug Control (Beijing, China)	111607-201503	>=98.0	Supplementary TLC / Fig S3
Paeoniflorin	National Institutes for Food and Drug Control (Beijing, China)	110736-201539	>=98.0	Figure S5

## Sheet: Table S2
Table S2: The primer sequences of the genes used in the present study.
Target gene	Sequence（5’->3’）	Tm	GC%
rβ-actin	F: 5’-CACCCGCGAGTACAACCTTC-3’	62	60
	R: 5’-CCCATACCCACCATCACACC-3’	62	60
rIL-17A	F: 5’-AACGCCGAGGCCAATAACTTTC-3’	60	50
	R: 5’-AGGGTCCTCATTGCGGCTCAGA-3’	64	59.09
rIL-4	F: 5’-AGTCACCGAGATGTTTGTACC-3’	57	47.62
	R: 5’-TTTCAGTGTTCTGAGCGTGGA-3’	59	47.62
rIL-10	F: 5’-TTCCATCCGGGGTGACAATAA-3’	59	47.62
	R: 5’-TTCTGGGCCATGGTTCTCTGC-3’	60	57.14
rIFN-γ	F: 5’-GGATATCTGGAGGAACTGGCA-3’	58	52.38
	R: 5’-GCTAGATTCTGGTGACAGCTG-3’	58	52.38

## Sheet: Table S3
Table S3: Active compounds were identified from the 13 herbs of the QHRGF
Authorities plant names	Numbers	Components
Coptis chinensis Franch	10	MOL000359,MOL000830,MOL000831,MOL000832,MOL000849,MOL000853, MOL000854,MOL000856，MOL002464, MOL000862
Anemarrhena asphodeloides Bunge	15	MOL001677, MOL003773, MOL000422, MOL004373, MOL004489, MOL004492, MOL004497,MOL004514,MOL000449,MOL004528,MOL004540,MOL004542, MOL000483, MOL000546, MOL000631
Paeonia × suffruticosa Andrews	11	MOL001925, MOL000211, MOL000359, MOL000422, MOL000492, MOL007003, MOL007369, MOL007374,MOL007382, MOL007384, MOL000098
Saposhnikovia divaricata (Turcz. ex Ledeb.) Schischk.	18	MOL000011, MOL011730, MOL011732, MOL011737, MOL011740, MOL001941, MOL011747, MOL011749, MOL011753, MOL002644, MOL000359, MOL000173, MOL000358, MOL001494,MOL001942,MOL003588, MOL007514, MOL013077
Chrysanthemum × morifolium (Ramat.) Hemsl.	20	MOL011802, MOL011816, MOL001689,MOL001790,MOL003044,MOL000354, MOL000422, MOL005100,MOL000006,MOL000098,MOL000358,MOL001506, MOL001733, MOL001755, MOL001771,MOL002881,MOL004328,MOL005229, MOL007326, MOL011319
Paeonia lactiflora Pall.	13	MOL001910, MOL001918, MOL001919, MOL001921, MOL001924, MOL001925, MOL001928, MOL001930, MOL000211, MOL000358, MOL000359, MOL000422, MOL000492
Gentiana crassa subsp. rigescens (Franch. ex Hemsl.) Halda	10	MOL001558, MOL002322, MOL003137, MOL003143, MOL003152, MOL003155, MOL003169, MOL003170, MOL000359, MOL000422
Scutellaria baicalensis Georgi	36	MOL001689,MOL000173,MOL000228,MOL002714,MOL002908,MOL002909, MOL002910,MOL002911,MOL002913,MOL002914,MOL002915,MOL002917, MOL002925MOL002926,MOL002927,MOL002928,MOL002932,MOL002933, MOL002934,MOL002937,MOL000358,MOL000359,MOL000525,MOL000552, MOL000073,MOL000449,MOL001458,MOL001490,MOL001506,MOL002879, MOL002897,MOL008206,MOL010415,MOL012245,MOL012246,MOL012266
Gardenia jasminoides J.Ellis	15	MOL001406,MOL001663,MOL001941,MOL004561,MOL001406,MOL001663, MOL001941,MOL004561,MOL001494,MOL001506MOL001942,MOL002883, MOL003095,MOL007245, MOL009038
Bupleurum chinense DC.	17	MOL001645,MOL002776,MOL000449,MOL000354,MOL000422,MOL004598, MOL004609,MOL013187,MOL004624,MOL004628,MOL004644,MOL004648, MOL004653,MOL004702,MOL004718,MOL000490,MOL000098
Rehmannia glutinosa (Gaertn.) DC.	2	MOL000359, MOL000449
Angelica sinensis (Oliv.) Diels	8	MOL010799,MOL010803,MOL010804,MOL001771,MOL000296,MOL000358, MOL000449,MOL000763
Glycyrrhiza glabra L.	120	MOL001484,MOL001792,MOL000211,MOL002311,MOL000239,MOL002565,MOL000354, MOL000359,MOL003656,MOL003896,MOL000392,MOL000417,MOL000422,MOL004328, MOL004805,MOL004806,MOL004808,MOL004810,MOL004811,MOL004814,MOL004815, MOL004820,MOL004824,MOL004827,MOL004828,MOL004829,MOL004833,MOL004835, MOL004838,MOL004841,MOL004848,MOL004849,MOL004855,MOL004856,MOL004857, MOL004860,MOL004863,MOL004864,MOL004866,MOL0…

## Sheet: Table S4
Table S4: 3520 potential targets of active components were identified
Drug	MolId	MolName	Symbol
Scutellariae Radix	MOL001689	acacetin	PTGS1
Scutellariae Radix	MOL001689	acacetin	AR
Scutellariae Radix	MOL001689	acacetin	PTGS2
Scutellariae Radix	MOL001689	acacetin	DPP4
Scutellariae Radix	MOL001689	acacetin	HSP90AA1
Scutellariae Radix	MOL001689	acacetin	CDK2
Scutellariae Radix	MOL001689	acacetin	PRSS1
Scutellariae Radix	MOL001689	acacetin	NCOA2
Scutellariae Radix	MOL001689	acacetin	NCOA1
Scutellariae Radix	MOL001689	acacetin	CALM1
Scutellariae Radix	MOL001689	acacetin	CHEK1
Scutellariae Radix	MOL001689	acacetin	ADRB2
Scutellariae Radix	MOL001689	acacetin	RELA
Scutellariae Radix	MOL001689	acacetin	BCL2
Scutellariae Radix	MOL001689	acacetin	CDKN1A
Scutellariae Radix	MOL001689	acacetin	BAX
Scutellariae Radix	MOL001689	acacetin	CASP3
Scutellariae Radix	MOL001689	acacetin	TP63
Scutellariae Radix	MOL001689	acacetin	CASP8
Scutellariae Radix	MOL001689	acacetin	FASN
Scutellariae Radix	MOL001689	acacetin	FASLG
Scutellariae Radix	MOL001689	acacetin	CYP19A1
Scutellariae Radix	MOL000173	wogonin	ESR1
Scutellariae Radix	MOL000173	wogonin	AR
Scutellariae Radix	MOL000173	wogonin	SCN5A
Scutellariae Radix	MOL000173	wogonin	PPARG
Scutellariae Radix	MOL000173	wogonin	PTGS2
Scutellariae Radix	MOL000173	wogonin	RXRA
Scutellariae Radix	MOL000173	wogonin	DPP4
Scutellariae Radix	MOL000173	wogonin	MAPK14
Scutellariae Radix	MOL000173	wogonin	GSK3B
Scutellariae Radix	MOL000173	wogonin	HSP90AA1
Scutellariae Radix	MOL000173	wogonin	CDK2
Scutellariae Radix	MOL000173	wogonin	CHEK1
Scutellariae Radix	MOL000173	wogonin	IL6
Scutellariae Radix	MOL000173	wogonin	AHSA1
Scutellariae Radix	MOL000173	wogonin	CASP3
Scutellariae Radix	MOL000173	wogonin	TP63
Scutellariae Radix	MOL000173	wogonin	BBC3
Scutellariae Radix	MOL000173	wogonin	TEP1
Scutellariae Radix	MOL000173	wogonin	MMP1
Scutellariae Radix	MOL000173	wogonin	CCL2
Scutellariae Radix	MOL000173	wogonin	PRKCD
Scutellariae Radix	MOL000173	wogonin	PTGER3
Scutellariae Radix	MOL000173	wogonin	FSD1
Scutellariae Radix	MOL000173	wogonin	IL8RA
Scutellariae Radix	MOL000173	wogonin	MCL1
Scutellariae Radix	MOL000228	(2R)-7-hydroxy-5-methoxy-2-phenylchroman-4-one	PTGS1
Scutellariae Radix	MOL000228	(2R)-7-hydroxy-5-methoxy-2-phenylchroman-4-one	DRD1
Scutellariae Radix	MOL000228	(2R)-7-hydroxy-5-methoxy-2-phenylchroman-4-one	CHRM3
Scutellariae Radix	MOL000228	(2R)-7-hydroxy-5-methoxy-2-phenylchroman-4-one	CHRM1
Scutellariae Radix	MOL000228	(2R)-7-hydroxy-5-methoxy-2-phenylchroman-4-one	ESR1
Scutellariae Radix	MOL000228	(2R)-7-hydroxy-5-methoxy-2-phenylchroman-4-one	SCN5A
Scutellariae Radix	MOL000228	(2R)-7-hydroxy-5-methoxy-2-phenylchroman-4-one	PTGS2
Scutellariae Radix	MOL000228	(2R)-7-hydroxy-5-methoxy-2-phenylchroman-4-one	ADRA1A
Scutellariae Radix	MOL000228	(2R)-7-hydroxy-5-methoxy-2-phenylchroman-4-one	ADRA1B
Scutellariae Radix	MOL000228	(2R)-7-hydroxy-5-methoxy-2-phenylchroman-4-one	SLC6A3
Scutellariae Radix	MOL000228	(2R)-7-hydroxy-5-methoxy-2-phenylchroman-4-one	ADRB2
Scutellariae Radix	MOL000228	(2R)-7-hydroxy-5-methoxy-2-phenylchroman-4-one	SLC6A4
Scutellariae Radix	MOL000228	(2R)-7-hydroxy-5-methoxy-2-phenylchroman-4-one	GABRA1
Scutellariae Radix	MOL000228	(2R)-7-hydroxy-5-methoxy-2-phenylchroman-4-one	HSP90AA1
Scutellariae Radix	MOL000228	(2R)-7-hydroxy-5-methoxy-2-phenylchroman-4-one	PKIA
Scutellariae Radix	MOL000228	(2R)-7-hydroxy-5-methoxy-2-phenylchroman-4-one	MAOB
Scutellariae Radix	MOL000228	(2R)-7-hydroxy-5-methoxy-2-phenylchroman-4-one	CALM1
Scutellariae Radix	MOL002714	baicalein	AR
Scutellariae Radix	MOL002714	baicalein	PTGS2
Scutellariae Radix	MOL002714	baicalein	HSP90AA1
Scutellariae Radix	MOL002714	baicalein	DPP4
Scutellariae Radix	MOL002714	baicalein	PRSS1
Scutellariae Radix	MOL002714	baicalein	NCOA2
Scutellariae Radix	MOL002714	baicalein	NCOA1
Scutellariae Radix	MOL002714	baicalein	CALM1
Scutellariae Radix	MOL002714	baicalein	RELA
Scutellariae Radix	MOL002714	baicalein	AKT1
Scutellariae Radix	MOL002714	baicalein	VEGFA
Scutellariae Radix	MOL002714	baicalein	FOS
Scutellariae Radix	MOL002714	baicalein	BAX
Scutellariae Radix	MOL002714	baicalein	MMP9
Scutellariae Radix	MOL002714	baicalein	CASP3
Scutellariae Radix	MOL002714	baicalein	TP63
Scutellariae Radix	MOL002714	baicalein	HIF1A
Scutellariae Radix	MOL002714	baicalein	FOSL1
Scutellariae Radix	MOL002714	baicalein	FOSL2
Scutellariae Radix	MOL002714	baicalein	CDK1
Scutellariae Radix	MOL002714	baicalein	CCNB1
Scutellariae Radix	MOL002714	baicalein	MPO
Scutellariae Radix	MOL002714	baicalein	AHR
Scutellariae Radix	MOL002714	baicalein	IGF2
Scutellariae Radix	MOL002714	baicalein	CYCS
Scutellariae Radix	MOL002714	baicalein	TDRD7
Scutellariae Radix	MOL002714	baicalein	EGLN1
Scutellariae Radix	MOL002714	baicalein	NOX5
Scutellariae Radix	MOL002714	baicalein	APOD
Scutellariae Radix	MOL002909	5,7,2,5-tetrahydroxy-8,6-dimethoxyflavone	HTR
Scutellariae Radix	MOL002909	5,7,2,5-tetrahydroxy-8,6-dimethoxyflavone	AR
Scutellariae Radix	MOL002909	5,7,2,5-tetrahydroxy-8,6-dimethoxyflavone	PTGS2
Scutellariae Radix	MOL002909	5,7,2,5-tetrahydroxy-8,6-dimethoxyflavone	DPP4
Scutellariae Radix	MOL002909	5,7,2,5-tetrahydroxy-8,6-dimethoxyflavone	HSP90AA1
Scutellariae Radix	MOL002909	5,7,2,5-tetrahydroxy-8,6-dimethoxyflavone	PRSS1
Scutellariae Radix	MOL002909	5,7,2,5-tetrahydroxy-8,6-dimethoxyflavone	NCOA2
Scutellariae Radix	MOL002910	Carthamidin	PTGS1
Scutellariae Radix	MOL002910	Carthamidin	HSP90AA1
Scutellariae Radix	MOL002913	Dihydrobaicalin_qt	PTGS1
Scutellariae Radix	MOL002913	Dihydrobaicalin_qt	PTGS2
Scutellariae Radix	MOL002913	Dihydrobaicalin_qt	HSP90AA1
Scutellariae Radix	MOL002914	Eriodyctiol (flavanone)	PTGS1
Scutellariae Radix	MOL002914	Eriodyctiol (flavanone)	PTGS2
Scutellariae Radix	MOL002914	Eriodyctiol (flavanone)	HSP90AA1
Scutellariae Radix	MOL002914	Eriodyctiol (flavanone)	NCOA2
Scutellariae Radix	MOL002915	Salvigenin	PTGS1
Scutellariae Radix	MOL002915	Salvigenin	HTR
Scutellariae Radix	MOL002915	Salvigenin	SCN5A
Scutellariae Radix	MOL002915	Salvigenin	PTGS2
Scutellariae Radix	MOL002915	Salvigenin	RXRA
Scutellariae Radix	MOL002915	Salvigenin	ACHE
Scutellariae Radix	MOL002915	Salvigenin	ADRA1B
Scutellariae Radix	MOL002915	Salvigenin	ADRB2
Scutellariae Radix	MOL002915	Salvigenin	DPP4
Scutellariae Radix	MOL002915	Salvigenin	HSP90AA1
Scutellariae Radix	MOL002915	Salvigenin	IGHG1
Scutellariae Radix	MOL002915	Salvigenin	NCOA2
Scutellariae Radix	MOL002915	Salvigenin	CALM1
Scutellariae Radix	MOL002915	Salvigenin	F7
Scutellariae Radix	MOL002917	5,2',6'-Trihydroxy-7,8-dimethoxyflavone	PTGS1
Scutellariae Radix	MOL002917	5,2',6'-Trihydroxy-7,8-dimethoxyflavone	AR
Scutellariae Radix	MOL002917	5,2',6'-Trihydroxy-7,8-dimethoxyflavone	SCN5A
Scutellariae Radix	MOL002917	5,2',6'-Trihydroxy-7,8-dimethoxyflavone	ESR2
Scutellariae Radix	MOL002917	5,2',6'-Trihydroxy-7,8-dimethoxyflavone	DPP4
Scutellariae Radix	MOL002917	5,2',6'-Trihydroxy-7,8-dimethoxyflavone	HSP90AA1
Scutellariae Radix	MOL002917	5,2',6'-Trihydroxy-7,8-dimethoxyflavone	CDK2
Scutellariae Radix	MOL002917	5,2',6'-Trihydroxy-7,8-dimethoxyflavone	CHEK1
Scutellariae Radix	MOL002917	5,2',6'-Trihydroxy-7,8-dimethoxyflavone	PRSS1
Scutellariae Radix	MOL002917	5,2',6'-Trihydroxy-7,8-dimethoxyflavone	NCOA2
Scutellariae Radix	MOL002917	5,2',6'-Trihydroxy-7,8-dimethoxyflavone	CALM1
Scutellariae Radix	MOL012266	rivularin	RXRA
Scutellariae Radix	MOL012266	rivularin	ESR2
Scutellariae Radix	MOL012266	rivularin	DPP4
Scutellariae Radix	MOL012266	rivularin	HSP90AA1
Scutellariae Radix	MOL012266	rivularin	PRSS1
Scutellariae Radix	MOL012266	rivularin	NCOA2
Scutellariae Radix	MOL012266	rivularin	NCOA1
Scutellariae Radix	MOL012266	rivularin	CALM1
Scutellariae Radix	MOL012246	5,7,4'-trihydroxy-8-methoxyflavanone	HSP90AA1
Scutellariae Radix	MOL012266	rivularin	PTGS1
Scutellariae Radix	MOL012266	rivularin	HTR
Scutellariae Radix	MOL012266	rivularin	KCNH2
Scutellariae Radix	MOL012266	rivularin	AR
Scutellariae Radix	MOL012266	rivularin	SCN5A
Scutellariae Radix	MOL012266	rivularin	PTGS2
Scutellariae Radix	MOL012266	rivularin	CA2
Scutellariae Radix	MOL012266	rivularin	F7
Scutellariae Radix	MOL012245	5,7,4'-trihydroxy-6-methoxyflavanone	PTGS1
Scutellariae Radix	MOL012245	5,7,4'-trihydroxy-6-methoxyflavanone	PTGS2
Scutellariae Radix	MOL012245	5,7,4'-trihydroxy-6-methoxyflavanone	CA2
Scutellariae Radix	MOL012245	5,7,4'-trihydroxy-6-methoxyflavanone	HSP90AA1
Scutellariae Radix	MOL012245	5,7,4'-trihydroxy-6-methoxyflavanone	CALM1
Scutellariae Radix	MOL012246	5,7,4'-trihydroxy-8-methoxyflavanone	PTGS1
Scutellariae Radix	MOL012246	5,7,4'-trihydroxy-8-methoxyflavanone	PTGS2
Scutellariae Radix	MOL012246	5,7,4'-trihydroxy-8-methoxyflavanone	CA2
Scutellariae Radix	MOL010415	11,13-Eicosadienoic acid, methyl ester	NCOA2
Scutellariae Radix	MOL008206	Moslosooflavone	GABRA1
Scutellariae Radix	MOL008206	Moslosooflavone	DPP4
Scutellariae Radix	MOL008206	Moslosooflavone	MAPK14
Scutellariae Radix	MOL008206	Moslosooflavone	GSK3B
Scutellariae Radix	MOL008206	Moslosooflavone	HSP90AA1
Scutellariae Radix	MOL008206	Moslosooflavone	CDK2
Scutellariae Radix	MOL008206	Moslosooflavone	CHEK1
Scutellariae Radix	MOL008206	Moslosooflavone	PRSS1
Scutellariae Radix	MOL008206	Moslosooflavone	NCOA1
Scutellariae Radix	MOL008206	Moslosooflavone	CALM1
Scutellariae Radix	MOL008206	Moslosooflavone	ADRA1B
Scutellariae Radix	MOL008206	Moslosooflavone	PTGS1
Scutellariae Radix	MOL008206	Moslosooflavone	HTR
Scutellariae Radix	MOL008206	Moslosooflavone	AR
Scutellariae Radix	MOL008206	Moslosooflavone	SCN5A
Scutellariae Radix	MOL008206	Moslosooflavone	PPARG
Scutellariae Radix	MOL008206	Moslosooflavone	PTGS2
Scutellariae Radix	MOL008206	Moslosooflavone	RXRA
Scutellariae Radix	MOL002897	epiberberine	RXRA
Scutellariae Radix	MOL002897	epiberberine	PRSS1
Scutellariae Radix	MOL002897	epiberberine	NCOA2
Scutellariae Radix	MOL002879	Diop	SCN5A
Scutellariae Radix	MOL002879	Diop	ADRB2
Scutellariae Radix	MOL002879	Diop	CHRM3
Scutellariae Radix	MOL002897	epiberberine	KCNH2
Scutellariae Radix	MOL002897	epiberberine	ESR1
Scutellariae Radix	MOL002897	epiberberine	AR
Scutellariae Radix	MOL001458	coptisine	PRSS1
Scutellariae Radix	MOL001490	bis[(2S)-2-ethylhexyl] benzene-1,2-dicarboxylate	SCN5A
Scutellariae Radix	MOL001458	coptisine	PTGS1
Scutellariae Radix	MOL001458	coptisine	KCNH2
Scutellariae Radix	MOL001458	coptisine	ESR1
Scutellariae Radix	MOL001458	coptisine	AR
Scutellariae Radix	MOL001458	coptisine	SCN5A
Scutellariae Radix	MOL001458	coptisine	PTGS2
Scutellariae Radix	MOL000449	Stigmasterol	CTRB1
Scutellariae Radix	MOL000449	Stigmasterol	CHRM3
Scutellariae Radix	MOL000449	Stigmasterol	CHRM1
Scutellariae Radix	MOL000449	Stigmasterol	ADRB1
Scutellariae Radix	MOL000449	Stigmasterol	SCN5A
Scutellariae Radix	MOL000449	Stigmasterol	ADRA1A
Scutellariae Radix	MOL000449	Stigmasterol	CHRM2
Scutellariae Radix	MOL000449	Stigmasterol	ADRA1B
Scutellariae Radix	MOL000449	Stigmasterol	GABRA1
Scutellariae Radix	MOL000449	Stigmasterol	ADH1C
Scutellariae Radix	MOL000449	Stigmasterol	IGHG1
Scutellariae Radix	MOL000449	Stigmasterol	RXRA
Scutellariae Radix	MOL000449	Stigmasterol	NCOA1
Scutellariae Radix	MOL000449	Stigmasterol	PTGS1
Scutellariae Radix	MOL000449	Stigmasterol	PTGS2
Scutellariae Radix	MOL000449	Stigmasterol	ADRA2A
Scutellariae Radix	MOL000449	Stigmasterol	SLC6A2
Scutellariae Radix	MOL000449	Stigmasterol	SLC6A3
Scutellariae Radix	MOL000449	Stigmasterol	ADRB2
Scutellariae Radix	MOL000449	Stigmasterol	AKR1B1
Scutellariae Radix	MOL000449	Stigmasterol	PLAU
Scutellariae Radix	MOL000449	Stigmasterol	LTA4H
Scutellariae Radix	MOL000449	Stigmasterol	MAOB
Scutellariae Radix	MOL000449	Stigmasterol	PGR
Scutellariae Radix	MOL000449	Stigmasterol	NR3C2
Scutellariae Radix	MOL000073	ent-Epicatechin	PTGS1
Scutellariae Radix	MOL000073	ent-Epicatechin	ESR1
Scutellariae Radix	MOL000073	ent-Epicatechin	PTGS2
Scutellariae Radix	MOL000552	5,2'-Dihydroxy-6,7,8-trimethoxyflavone	HSP90AA1
Scutellariae Radix	MOL000552	5,2'-Dihydroxy-6,7,8-trimethoxyflavone	PRSS1
Scutellariae Radix	MOL000552	5,2'-Dihydroxy-6,7,8-trimethoxyflavone	NCOA2
Scutellariae Radix	MOL000552	5,2'-Dihydroxy-6,7,8-trimethoxyflavone	CALM1
Scutellariae Radix	MOL000552	5,2'-Dihydroxy-6,7,8-trimethoxyflavone	KDR
Scutellariae Radix	MOL000552	5,2'-Dihydroxy-6,7,8-trimethoxyflavone	NCOA1
Scutellariae Radix	MOL000552	5,2'-Dihydroxy-6,7,8-trimethoxyflavone	PTGS1
Scutellariae Radix	MOL000552	5,2'-Dihydroxy-6,7,8-trimethoxyflavone	HTR
Scutellariae Radix	MOL000552	5,2'-Dihydroxy-6,7,8-trimethoxyflavone	KCNH2
Scutellariae Radix	MOL000552	5,2'-Dihydroxy-6,7,8-trimethoxyflavone	AR
Scutellariae Radix	MOL000552	5,2'-Dihydroxy-6,7,8-trimethoxyflavone	SCN5A
Scutellariae Radix	MOL000552	5,2'-Dihydroxy-6,7,8-trimethoxyflavone	PTGS2
Scutellariae Radix	MOL000552	5,2'-Dihydroxy-6,7,8-trimethoxyflavone	F7
Scutellariae Radix	MOL000552	5,2'-Dihydroxy-6,7,8-trimethoxyflavone	ESR2
Scutellariae Radix	MOL000552	5,2'-Dihydroxy-6,7,8-trimethoxyflavone	DPP4
Scutellariae Radix	MOL000525	Norwogonin	PTGS1
Scutellariae Radix	MOL000525	Norwogonin	AR
Scutellariae Radix	MOL000525	Norwogonin	PPARG
Scutellariae Radix	MOL000525	Norwogonin	PTGS2
Scutellariae Radix	MOL000525	Norwogonin	DPP4
Scutellariae Radix	MOL000525	Norwogonin	HSP90AA1
Scutellariae Radix	MOL000525	Norwogonin	CDK2
Scutellariae Radix	MOL000358	beta-sitosterol	JUN
Scutellariae Radix	MOL000358	beta-sitosterol	CASP3
Scutellariae Radix	MOL000358	beta-sitosterol	CASP8
Scutellariae Radix	MOL000358	beta-sitosterol	PRKCA
Scutellariae Radix	MOL000358	beta-sitosterol	PON1
Scutellariae Radix	MOL000358	beta-sitosterol	MAP2
Scutellariae Radix	MOL000359	sitosterol	PGR
Scutellariae Radix	MOL000359	sitosterol	NCOA2
Scutellariae Radix	MOL000359	sitosterol	NR3C2
Scutellariae Radix	MOL000358	beta-sitosterol	ADRA1A
Scutellariae Radix	MOL000358	beta-sitosterol	CHRM2
Scutellariae Radix	MOL000358	beta-sitosterol	ADRA1B
Scutellariae Radix	MOL000358	beta-sitosterol	ADRB2
Scutellariae Radix	MOL000358	beta-sitosterol	CHRNA2
Scutellariae Radix	MOL000358	beta-sitosterol	SLC6A4
Scutellariae Radix	MOL000358	beta-sitosterol	OPRM1
Scutellariae Radix	MOL000358	beta-sitosterol	GABRA1
Scutellariae Radix	MOL000358	beta-sitosterol	BCL2
Scutellariae Radix	MOL000358	beta-sitosterol	BAX
Scutellariae Radix	MOL000358	beta-sitosterol	NCOA2
Scutellariae Radix	MOL000358	beta-sitosterol	PTGS1
Scutellariae Radix	MOL000358	beta-sitosterol	PTGS2
Scutellariae Radix	MOL000358	beta-sitosterol	HSP90AA1
Scutellariae Radix	MOL000358	beta-sitosterol	KCNH2
Scutellariae Radix	MOL000358	beta-sitosterol	DRD1
Scutellariae Radix	MOL000358	beta-sitosterol	CHRM3
Scutellariae Radix	MOL000358	beta-sitosterol	CHRM1
Scutellariae Radix	MOL000358	beta-sitosterol	SCN5A
Scutellariae Radix	MOL000358	beta-sitosterol	CHRM4
Scutellariae Radix	MOL002937	DIHYDROOROXYLIN	PTGS1
Scutellariae Radix	MOL002937	DIHYDROOROXYLIN	SCN5A
Scutellariae Radix	MOL002937	DIHYDROOROXYLIN	PTGS2
Scutellariae Radix	MOL002937	DIHYDROOROXYLIN	RXRA
Scutellariae Radix	MOL002937	DIHYDROOROXYLIN	ADRA1B
Scutellariae Radix	MOL002937	DIHYDROOROXYLIN	ADRB2
Scutellariae Radix	MOL002937	DIHYDROOROXYLIN	HSP90AA1
Scutellariae Radix	MOL002937	DIHYDROOROXYLIN	CALM1
Scutellariae Radix	MOL002937	DIHYDROOROXYLIN	NCOA1
Scutellariae Radix	MOL002934	NEOBAICALEIN	GSK3B
Scutellariae Radix	MOL002934	NEOBAICALEIN	HSP90AA1
Scutellariae Radix	MOL002934	NEOBAICALEIN	CHEK1
Scutellariae Radix	MOL002934	NEOBAICALEIN	PRSS1
Scutellariae Radix	MOL002934	NEOBAICALEIN	NCOA2
Scutellariae Radix	MOL002934	NEOBAICALEIN	CALM1
Scutellariae Radix	MOL002934	NEOBAICALEIN	HTR
Scutellariae Radix	MOL002934	NEOBAICALEIN	KCNH2
Scutellariae Radix	MOL002934	NEOBAICALEIN	ESR1
Scutellariae Radix	MOL002934	NEOBAICALEIN	AR
Scutellariae Radix	MOL002934	NEOBAICALEIN	SCN5A
Scutellariae Radix	MOL002934	NEOBAICALEIN	PPARG
Scutellariae Radix	MOL002934	NEOBAICALEIN	PTGS2
Scutellariae Radix	MOL002934	NEOBAICALEIN	F7
Scutellariae Radix	MOL002934	NEOBAICALEIN	ESR2
Scutellariae Radix	MOL002933	5,7,4'-Trihydroxy-8-methoxyflavone	ESR1
Scutellariae Radix	MOL002933	5,7,4'-Trihydroxy-8-methoxyflavone	AR
Scutellariae Radix	MOL002933	5,7,4'-Trihydroxy-8-methoxyflavone	PPARG
Scutellariae Radix	MOL002933	5,7,4'-Trihydroxy-8-methoxyflavone	PTGS2
Scutellariae Radix	MOL002933	5,7,4'-Trihydroxy-8-methoxyflavone	DPP4
Scutellariae Radix	MOL002933	5,7,4'-Trihydroxy-8-methoxyflavone	MAPK14
Scutellariae Radix	MOL002933	5,7,4'-Trihydroxy-8-methoxyflavone	GSK3B
Scutellariae Radix	MOL002933	5,7,4'-Trihydroxy-8-methoxyflavone	HSP90AA1
Scutellariae Radix	MOL002933	5,7,4'-Trihydroxy-8-methoxyflavone	CDK2
Scutellariae Radix	MOL002933	5,7,4'-Trihydroxy-8-methoxyflavone	CHEK1
Scutellariae Radix	MOL002933	5,7,4'-Trihydroxy-8-methoxyflavone	PRSS1
Scutellariae Radix	MOL002933	5,7,4'-Trihydroxy-8-methoxyflavone	NCOA2
Scutellariae Radix	MOL002932	Panicolin	PTGS1
Scutellariae Radix	MOL002932	Panicolin	AR
Scutellariae Radix	MOL002932	Panicolin	SCN5A
Scutellariae Radix	MOL002932	Panicolin	PTGS2
Scutellariae Radix	MOL002932	Panicolin	ESR2
Scutellariae Radix	MOL002932	Panicolin	DPP4
Scutellariae Radix	MOL002932	Panicolin	HSP90AA1
Scutellariae Radix	MOL002932	Panicolin	CDK2
Scutellariae Radix	MOL002932	Panicolin	CHEK1
Scutellariae Radix	MOL002932	Panicolin	PRSS1
Scutellariae Radix	MOL002932	Panicolin	CALM1
Scutellariae Radix	MOL002932	Panicolin	NCOA1
Scutellariae Radix	MOL002928	oroxylin a	PKIA
Scutellariae Radix	MOL002928	oroxylin a	BCL2
Scutellariae Radix	MOL002928	oroxylin a	IL6
Scutellariae Radix	MOL002928	oroxylin a	CASP3
Scutellariae Radix	MOL002928	oroxylin a	CDK1
Scutellariae Radix	MOL002928	oroxylin a	CYP1A2
Scutellariae Radix	MOL002928	oroxylin a	CCNB1
Scutellariae Radix	MOL002928	oroxylin a	CDK7
Scutellariae Radix	MOL002928	oroxylin a	CYP2C9
Scutellariae Radix	MOL002928	oroxylin a	AR
Scutellariae Radix	MOL002928	oroxylin a	SCN5A
Scutellariae Radix	MOL002928	oroxylin a	PTGS2
Scutellariae Radix	MOL002928	oroxylin a	RXRA
Scutellariae Radix	MOL002928	oroxylin a	ADRA1B
Scutellariae Radix	MOL002928	oroxylin a	ADRB2
Scutellariae Radix	MOL002928	oroxylin a	DPP4
Scutellariae Radix	MOL002928	oroxylin a	HSP90AA1
Scutellariae Radix	MOL002928	oroxylin a	PRSS1
Scutellariae Radix	MOL002928	oroxylin a	NCOA1
Scutellariae Radix	MOL002928	oroxylin a	CALM1
Scutellariae Radix	MOL002927	Skullcapflavone II	F7
Scutellariae Radix	MOL002927	Skullcapflavone II	KDR
Scutellariae Radix	MOL002927	Skullcapflavone II	CACNA2D1
Scutellariae Radix	MOL002927	Skullcapflavone II	DPP4
Scutellariae Radix	MOL002927	Skullcapflavone II	HSP90AA1
Scutellariae Radix	MOL002927	Skullcapflavone II	IGHG1
Scutellariae Radix	MOL002927	Skullcapflavone II	PRSS1
Scutellariae Radix	MOL002927	Skullcapflavone II	NCOA2
Scutellariae Radix	MOL002927	Skullcapflavone II	NCOA1
Scutellariae Radix	MOL002927	Skullcapflavone II	CALM1
Scutellariae Radix	MOL002925	5,7,2',6'-Tetrahydroxyflavone	PTGS1
Scutellariae Radix	MOL002925	5,7,2',6'-Tetrahydroxyflavone	AR
Scutellariae Radix	MOL002925	5,7,2',6'-Tetrahydroxyflavone	PTGS2
Scutellariae Radix	MOL002925	5,7,2',6'-Tetrahydroxyflavone	DPP4
Scutellariae Radix	MOL002925	5,7,2',6'-Tetrahydroxyflavone	HSP90AA1
Scutellariae Radix	MOL002927	Skullcapflavone II	PTGS1
Scutellariae Radix	MOL002927	Skullcapflavone II	HTR
Scutellariae Radix	MOL002927	Skullcapflavone II	KCNH2
Scutellariae Radix	MOL002927	Skullcapflavone II	AR
Scutellariae Radix	MOL002927	Skullcapflavone II	SCN5A
Scutellariae Radix	MOL002917	5,2',6'-Trihydroxy-7,8-dimethoxyflavone	PTGS2
Scutellariae Radix	MOL002917	5,2',6'-Trihydroxy-7,8-dimethoxyflavone	ESR2
Scutellariae Radix	MOL002917	5,2',6'-Trihydroxy-7,8-dimethoxyflavone	DPP4
Scutellariae Radix	MOL002917	5,2',6'-Trihydroxy-7,8-dimethoxyflavone	HSP90AA1
Scutellariae Radix	MOL002917	5,2',6'-Trihydroxy-7,8-dimethoxyflavone	CDK2
Scutellariae Radix	MOL002917	5,2',6'-Trihydroxy-7,8-dimethoxyflavone	CHEK1
Scutellariae Radix	MOL002917	5,2',6'-Trihydroxy-7,8-dimethoxyflavone	PRSS1
Scutellariae Radix	MOL002917	5,2',6'-Trihydroxy-7,8-dimethoxyflavone	NCOA2
Scutellariae Radix	MOL002917	5,2',6'-Trihydroxy-7,8-dimethoxyflavone	CALM1
Scutellariae Radix	MOL002915	Salvigenin	NCOA2
Scutellariae Radix	MOL002915	Salvigenin	CALM1
Scutellariae Radix	MOL002915	Salvigenin	F7
Scutellariae Radix	MOL002917	5,2',6'-Trihydroxy-7,8-dimethoxyflavone	PTGS1
Scutellariae Radix	MOL002917	5,2',6'-Trihydroxy-7,8-dimethoxyflavone	AR
Scutellariae Radix	MOL002917	5,2',6'-Trihydroxy-7,8-dimethoxyflavone	SCN5A
Scutellariae Radix	MOL002915	Salvigenin	PTGS1
Scutellariae Radix	MOL002915	Salvigenin	HTR
Scutellariae Radix	MOL002915	Salvigenin	SCN5A
Scutellariae Radix	MOL002915	Salvigenin	PTGS2
Scutellariae Radix	MOL002915	Salvigenin	RXRA
Scutellariae Radix	MOL002915	Salvigenin	ACHE
Scutellariae Radix	MOL002915	Salvigenin	ADRA1B
Scutellariae Radix	MOL002915	Salvigenin	ADRB2
Scutellariae Radix	MOL002915	Salvigenin	DPP4
Scutellariae Radix	MOL002915	Salvigenin	HSP90AA1
Scutellariae Radix	MOL002915	Salvigenin	IGHG1
Scutellariae Radix	MOL002910	Carthamidin	HSP90AA1
Scutellariae Radix	MOL002913	Dihydrobaicalin_qt	PTGS1
Scutellariae Radix	MOL002913	Dihydrobaicalin_qt	PTGS2
Scutellariae Radix	MOL002913	Dihydrobaicalin_qt	HSP90AA1
Scutellariae Radix	MOL002914	Eriodyctiol (flavanone)	PTGS1
Scutellariae Radix	MOL002914	Eriodyctiol (flavanone)	PTGS2
Scutellariae Radix	MOL002914	Eriodyctiol (flavanone)	HSP90AA1
Scutellariae Radix	MOL002914	Eriodyctiol (flavanone)	NCOA2
Chrysanthemi Flos	MOL011319	Truflex OBP	ADRB2
Chrysanthemi Flos	MOL011319	Truflex OBP	ADRB2
Chrysanthemi Flos	MOL011802	(24r)-saringosterol	PGR
Chrysanthemi Flos	MOL011816	[(1S,5S,7S)-7-acetoxy-5-isopropenyl-2,8-dimethylene-cyclodecyl] acetate	NOS2
Chrysanthemi Flos	MOL011816	[(1S,5S,7S)-7-acetoxy-5-isopropenyl-2,8-dimethylene-cyclodecyl] acetate	AR
Chrysanthemi Flos	MOL011816	[(1S,5S,7S)-7-acetoxy-5-isopropenyl-2,8-dimethylene-cyclodecyl] acetate	PTGS2
Chrysanthemi Flos	MOL011816	[(1S,5S,7S)-7-acetoxy-5-isopropenyl-2,8-dimethylene-cyclodecyl] acetate	CA2
Chrysanthemi Flos	MOL011816	[(1S,5S,7S)-7-acetoxy-5-isopropenyl-2,8-dimethylene-cyclodecyl] acetate	DPP4
Chrysanthemi Flos	MOL011816	[(1S,5S,7S)-7-acetoxy-5-isopropenyl-2,8-dimethylene-cyclodecyl] acetate	NCOA2
Chrysanthemi Flos	MOL001689	acacetin	NOS2
Chrysanthemi Flos	MOL001689	acacetin	PTGS1
Chrysanthemi Flos	MOL001689	acacetin	AR
Chrysanthemi Flos	MOL001689	acacetin	PTGS2
Chrysanthemi Flos	MOL001689	acacetin	DPP4
Chrysanthemi Flos	MOL001689	acacetin	HSP90AA1
Chrysanthemi Flos	MOL001689	acacetin	CDK2
Chrysanthemi Flos	MOL001689	acacetin	PRSS1
Chrysanthemi Flos	MOL001689	acacetin	NCOA2
Chrysanthemi Flos	MOL001689	acacetin	NCOA1
Chrysanthemi Flos	MOL001689	acacetin	CALM1
Chrysanthemi Flos	MOL001689	acacetin	ADRB2
Chrysanthemi Flos	MOL001689	acacetin	RELA
Chrysanthemi Flos	MOL001689	acacetin	BCL2
Chrysanthemi Flos	MOL001689	acacetin	CDKN1A
Chrysanthemi Flos	MOL001689	acacetin	BAX
Chrysanthemi Flos	MOL001689	acacetin	CASP3
Chrysanthemi Flos	MOL001689	acacetin	TP63
Chrysanthemi Flos	MOL001689	acacetin	CASP8
Chrysanthemi Flos	MOL001689	acacetin	FASN
Chrysanthemi Flos	MOL001689	acacetin	FASLG
Chrysanthemi Flos	MOL001689	acacetin	CYP19A1
Chrysanthemi Flos	MOL003044	Chryseriol	PTGS1
Chrysanthemi Flos	MOL003044	Chryseriol	ESR1
Chrysanthemi Flos	MOL003044	Chryseriol	AR
Chrysanthemi Flos	MOL003044	Chryseriol	PPARG
Chrysanthemi Flos	MOL003044	Chryseriol	PTGS2
Chrysanthemi Flos	MOL003044	Chryseriol	DPP4
Chrysanthemi Flos	MOL003044	Chryseriol	MAPK14
Chrysanthemi Flos	MOL003044	Chryseriol	GSK3B
Chrysanthemi Flos	MOL003044	Chryseriol	HSP90AA1
Chrysanthemi Flos	MOL003044	Chryseriol	CDK2
Chrysanthemi Flos	MOL003044	Chryseriol	CHEK1
Chrysanthemi Flos	MOL003044	Chryseriol	PRSS1
Chrysanthemi Flos	MOL003044	Chryseriol	NCOA1
Chrysanthemi Flos	MOL003044	Chryseriol	CALM1
Chrysanthemi Flos	MOL000354	isorhamnetin	NOS2
Chrysanthemi Flos	MOL000354	isorhamnetin	PTGS1
Chrysanthemi Flos	MOL000354	isorhamnetin	ESR1
Chrysanthemi Flos	MOL000354	isorhamnetin	AR
Chrysanthemi Flos	MOL000354	isorhamnetin	PPARG
Chrysanthemi Flos	MOL000354	isorhamnetin	PTGS2
Chrysanthemi Flos	MOL000354	isorhamnetin	ESR2
Chrysanthemi Flos	MOL000354	isorhamnetin	DPP4
Chrysanthemi Flos	MOL000354	isorhamnetin	GSK3B
Chrysanthemi Flos	MOL000354	isorhamnetin	HSP90AA1
Chrysanthemi Flos	MOL000354	isorhamnetin	CDK2
Chrysanthemi Flos	MOL000354	isorhamnetin	PRSS1
Chrysanthemi Flos	MOL000354	isorhamnetin	CCNA2
Chrysanthemi Flos	MOL000354	isorhamnetin	NCOA2
Chrysanthemi Flos	MOL000354	isorhamnetin	CALM1
Chrysanthemi Flos	MOL000354	isorhamnetin	PYGM
Chrysanthemi Flos	MOL000354	isorhamnetin	PPARD
Chrysanthemi Flos	MOL000354	isorhamnetin	CHEK1
Chrysanthemi Flos	MOL000354	isorhamnetin	AKR1B1
Chrysanthemi Flos	MOL000354	isorhamnetin	F7
Chrysanthemi Flos	MOL000354	isorhamnetin	HTR
Chrysanthemi Flos	MOL000354	isorhamnetin	ACHE
Chrysanthemi Flos	MOL000354	isorhamnetin	GABRA1
Chrysanthemi Flos	MOL000354	isorhamnetin	MAOB
Chrysanthemi Flos	MOL000354	isorhamnetin	GRIA2
Chrysanthemi Flos	MOL000354	isorhamnetin	RELA
Chrysanthemi Flos	MOL000354	isorhamnetin	NCF1
Chrysanthemi Flos	MOL000354	isorhamnetin	OLR1
Chrysanthemi Flos	MOL000422	kaempferol	NOS2
Chrysanthemi Flos	MOL000422	kaempferol	PTGS1
Chrysanthemi Flos	MOL000422	kaempferol	AR
Chrysanthemi Flos	MOL000422	kaempferol	PPARG
Chrysanthemi Flos	MOL000422	kaempferol	PTGS2
Chrysanthemi Flos	MOL000422	kaempferol	HSP90AA1
Chrysanthemi Flos	MOL000422	kaempferol	NCOA2
Chrysanthemi Flos	MOL000422	kaempferol	DPP4
Chrysanthemi Flos	MOL000422	kaempferol	PRSS1
Chrysanthemi Flos	MOL000422	kaempferol	PGR
Chrysanthemi Flos	MOL000422	kaempferol	HTR
Chrysanthemi Flos	MOL000422	kaempferol	CHRM1
Chrysanthemi Flos	MOL000422	kaempferol	ACHE
Chrysanthemi Flos	MOL000422	kaempferol	SLC6A2
Chrysanthemi Flos	MOL000422	kaempferol	CHRM2
Chrysanthemi Flos	MOL000422	kaempferol	ADRA1B
Chrysanthemi Flos	MOL000422	kaempferol	GABRA1
Chrysanthemi Flos	MOL000422	kaempferol	CALM1
Chrysanthemi Flos	MOL000422	kaempferol	RELA
Chrysanthemi Flos	MOL000422	kaempferol	IKBKB
Chrysanthemi Flos	MOL000422	kaempferol	AKT1
Chrysanthemi Flos	MOL000422	kaempferol	BCL2
Chrysanthemi Flos	MOL000422	kaempferol	BAX
Chrysanthemi Flos	MOL000422	kaempferol	TNFSF15
Chrysanthemi Flos	MOL000422	kaempferol	JUN
Chrysanthemi Flos	MOL000422	kaempferol	AHSA1
Chrysanthemi Flos	MOL000422	kaempferol	CASP3
Chrysanthemi Flos	MOL000422	kaempferol	MAPK8
Chrysanthemi Flos	MOL000422	kaempferol	MMP1
Chrysanthemi Flos	MOL000422	kaempferol	STAT1
Chrysanthemi Flos	MOL000422	kaempferol	PPARG
Chrysanthemi Flos	MOL000422	kaempferol	HMOX1
Chrysanthemi Flos	MOL000422	kaempferol	CYP3A4
Chrysanthemi Flos	MOL000422	kaempferol	CYP1A2
Chrysanthemi Flos	MOL000422	kaempferol	CYP1A1
Chrysanthemi Flos	MOL000422	kaempferol	ICAM1
Chrysanthemi Flos	MOL000422	kaempferol	SELE
Chrysanthemi Flos	MOL000422	kaempferol	VCAM1
Chrysanthemi Flos	MOL000422	kaempferol	NR1I2
Chrysanthemi Flos	MOL000422	kaempferol	CYP1B1
Chrysanthemi Flos	MOL000422	kaempferol	ALOX5
Chrysanthemi Flos	MOL000422	kaempferol	HAS2
Chrysanthemi Flos	MOL000422	kaempferol	GSTP1
Chrysanthemi Flos	MOL000422	kaempferol	AHR
Chrysanthemi Flos	MOL000422	kaempferol	SLC2A4
Chrysanthemi Flos	MOL000422	kaempferol	NR1I3
Chrysanthemi Flos	MOL000422	kaempferol	INSRR
Chrysanthemi Flos	MOL000422	kaempferol	DIO1
Chrysanthemi Flos	MOL000422	kaempferol	PPP3CA
Chrysanthemi Flos	MOL000422	kaempferol	GSTM1
Chrysanthemi Flos	MOL000422	kaempferol	GSTM2
Chrysanthemi Flos	MOL000422	kaempferol	AKR1C3
Chrysanthemi Flos	MOL000422	kaempferol	SLPI
Chrysanthemi Flos	MOL005229	Artemetin	CDK2
Chrysanthemi Flos	MOL005229	Artemetin	CHEK1
Chrysanthemi Flos	MOL005229	Artemetin	PRSS1
Chrysanthemi Flos	MOL005229	Artemetin	NCOA2
Chrysanthemi Flos	MOL005229	Artemetin	CALM1
Chrysanthemi Flos	MOL005229	Artemetin	HTR
Chrysanthemi Flos	MOL005229	Artemetin	KCNH2
Chrysanthemi Flos	MOL005229	Artemetin	ESR1
Chrysanthemi Flos	MOL005229	Artemetin	AR
Chrysanthemi Flos	MOL005229	Artemetin	SCN5A
Chrysanthemi Flos	MOL005229	Artemetin	PPARG
Chrysanthemi Flos	MOL005229	Artemetin	PTGS2
Chrysanthemi Flos	MOL005229	Artemetin	F7
Chrysanthemi Flos	MOL005229	Artemetin	ESR2
Chrysanthemi Flos	MOL005229	Artemetin	DPP4
Chrysanthemi Flos	MOL005229	Artemetin	MAPK14
Chrysanthemi Flos	MOL004328	naringenin	ABCC1
Chrysanthemi Flos	MOL004328	naringenin	C1QB
Chrysanthemi Flos	MOL004328	naringenin	SOAT2
Chrysanthemi Flos	MOL004328	naringenin	AKR1C1
Chrysanthemi Flos	MOL004328	naringenin	GOT1
Chrysanthemi Flos	MOL004328	naringenin	ABAT
Chrysanthemi Flos	MOL004328	naringenin	CES1
Chrysanthemi Flos	MOL004328	naringenin	SOAT1
Chrysanthemi Flos	MOL004328	naringenin	LDLR
Chrysanthemi Flos	MOL004328	naringenin	BAD
Chrysanthemi Flos	MOL004328	naringenin	SOD1
Chrysanthemi Flos	MOL004328	naringenin	CAT
Chrysanthemi Flos	MOL004328	naringenin	PPARG
Chrysanthemi Flos	MOL004328	naringenin	MTTP
Chrysanthemi Flos	MOL004328	naringenin	APOB
Chrysanthemi Flos	MOL004328	naringenin	PLB1
Chrysanthemi Flos	MOL004328	naringenin	HMGCR
Chrysanthemi Flos	MOL004328	naringenin	CYP19A1
Chrysanthemi Flos	MOL004328	naringenin	GSTP1
Chrysanthemi Flos	MOL004328	naringenin	UGT1A1
Chrysanthemi Flos	MOL004328	naringenin	PPARA
Chrysanthemi Flos	MOL004328	naringenin	SREBF1
Chrysanthemi Flos	MOL004328	naringenin	PTGS1
Chrysanthemi Flos	MOL004328	naringenin	ESR1
Chrysanthemi Flos	MOL004328	naringenin	PTGS2
Chrysanthemi Flos	MOL004328	naringenin	HSP90AA1
Chrysanthemi Flos	MOL004328	naringenin	RELA
Chrysanthemi Flos	MOL004328	naringenin	AKT1
Chrysanthemi Flos	MOL004328	naringenin	BCL2
Chrysanthemi Flos	MOL004328	naringenin	MAPK3
Chrysanthemi Flos	MOL004328	naringenin	MAPK1
Chrysanthemi Flos	MOL004328	naringenin	CASP3
Chrysanthemi Flos	MOL002881	Diosmetin	HSP90AA1
Chrysanthemi Flos	MOL002881	Diosmetin	PRSS1
Chrysanthemi Flos	MOL002881	Diosmetin	NCOA2
Chrysanthemi Flos	MOL002881	Diosmetin	NCOA1
Chrysanthemi Flos	MOL002881	Diosmetin	CALM1
Chrysanthemi Flos	MOL002881	Diosmetin	NOS2
Chrysanthemi Flos	MOL002881	Diosmetin	PTGS1
Chrysanthemi Flos	MOL002881	Diosmetin	PTGS2
Chrysanthemi Flos	MOL001755	24-Ethylcholest-4-en-3-one	PGR
Chrysanthemi Flos	MOL001755	24-Ethylcholest-4-en-3-one	NR3C2
Chrysanthemi Flos	MOL001771	poriferast-5-en-3beta-ol	PGR
Chrysanthemi Flos	MOL001771	poriferast-5-en-3beta-ol	NCOA2
Chrysanthemi Flos	MOL001733	EUPATORIN	NOS2
Chrysanthemi Flos	MOL001733	EUPATORIN	PTGS1
Chrysanthemi Flos	MOL001733	EUPATORIN	HTR
Chrysanthemi Flos	MOL001733	EUPATORIN	SCN5A
Chrysanthemi Flos	MOL001733	EUPATORIN	PTGS2
Chrysanthemi Flos	MOL001733	EUPATORIN	F7
Chrysanthemi Flos	MOL001733	EUPATORIN	DPP4
Chrysanthemi Flos	MOL001733	EUPATORIN	HSP90AA1
Chrysanthemi Flos	MOL001733	EUPATORIN	PRSS1
Chrysanthemi Flos	MOL001733	EUPATORIN	NCOA2
Chrysanthemi Flos	MOL001733	EUPATORIN	NCOA1
Chrysanthemi Flos	MOL001733	EUPATORIN	CALM1
Chrysanthemi Flos	MOL000358	beta-sitosterol	PRKCA
Chrysanthemi Flos	MOL000358	beta-sitosterol	PON1
Chrysanthemi Flos	MOL000358	beta-sitosterol	MAP2
Chrysanthemi Flos	MOL000358	beta-sitosterol	CHRM2
Chrysanthemi Flos	MOL000358	beta-sitosterol	ADRA1B
Chrysanthemi Flos	MOL000358	beta-sitosterol	ADRB2
Chrysanthemi Flos	MOL000358	beta-sitosterol	CHRNA2
Chrysanthemi Flos	MOL000358	beta-sitosterol	SLC6A4
Chrysanthemi Flos	MOL000358	beta-sitosterol	OPRM1
Chrysanthemi Flos	MOL000358	beta-sitosterol	GABRA1
Chrysanthemi Flos	MOL000358	beta-sitosterol	BCL2
Chrysanthemi Flos	MOL000358	beta-sitosterol	BAX
Chrysanthemi Flos	MOL000358	beta-sitosterol	CASP9
Chrysanthemi Flos	MOL000358	beta-sitosterol	JUN
Chrysanthemi Flos	MOL000358	beta-sitosterol	CASP3
Chrysanthemi Flos	MOL000358	beta-sitosterol	HSP90AA1
Chrysanthemi Flos	MOL000358	beta-sitosterol	KCNH2
Chrysanthemi Flos	MOL000358	beta-sitosterol	DRD1
Chrysanthemi Flos	MOL000358	beta-sitosterol	CHRM3
Chrysanthemi Flos	MOL000358	beta-sitosterol	CHRM1
Chrysanthemi Flos	MOL000358	beta-sitosterol	SCN5A
Chrysanthemi Flos	MOL000358	beta-sitosterol	CHRM4
Chrysanthemi Flos	MOL000358	beta-sitosterol	ADRA1A
Chrysanthemi Flos	MOL000358	beta-sitosterol	PGR
Chrysanthemi Flos	MOL000358	beta-sitosterol	NCOA2
Chrysanthemi Flos	MOL000358	beta-sitosterol	PTGS1
Chrysanthemi Flos	MOL000422	kaempferol	CALM1
Chrysanthemi Flos	MOL000422	kaempferol	RELA
Chrysanthemi Flos	MOL000422	kaempferol	IKBKB
Chrysanthemi Flos	MOL000422	kaempferol	AKT1
Chrysanthemi Flos	MOL000422	kaempferol	BCL2
Chrysanthemi Flos	MOL000422	kaempferol	BAX
Chrysanthemi Flos	MOL000422	kaempferol	TNFSF15
Chrysanthemi Flos	MOL000422	kaempferol	JUN
Chrysanthemi Flos	MOL000422	kaempferol	AHSA1
Chrysanthemi Flos	MOL000422	kaempferol	CASP3
Chrysanthemi Flos	MOL000422	kaempferol	MAPK8
Chrysanthemi Flos	MOL000422	kaempferol	MMP1
Chrysanthemi Flos	MOL000422	kaempferol	STAT1
Chrysanthemi Flos	MOL000422	kaempferol	PPARG
Chrysanthemi Flos	MOL000422	kaempferol	HMOX1
Chrysanthemi Flos	MOL000422	kaempferol	CYP3A4
Chrysanthemi Flos	MOL000422	kaempferol	CYP1A2
Chrysanthemi Flos	MOL000422	kaempferol	CYP1A1
Chrysanthemi Flos	MOL000422	kaempferol	ICAM1
Chrysanthemi Flos	MOL000422	kaempferol	SELE
Chrysanthemi Flos	MOL000422	kaempferol	VCAM1
Chrysanthemi Flos	MOL000422	kaempferol	NR1I2
Chrysanthemi Flos	MOL000422	kaempferol	CYP1B1
Chrysanthemi Flos	MOL000422	kaempferol	ALOX5
Chrysanthemi Flos	MOL000422	kaempferol	HAS2
Chrysanthemi Flos	MOL000422	kaempferol	GSTP1
Chrysanthemi Flos	MOL000422	kaempferol	AHR
Chrysanthemi Flos	MOL000422	kaempferol	SLC2A4
Chrysanthemi Flos	MOL000422	kaempferol	NR1I3
Chrysanthemi Flos	MOL000422	kaempferol	INSRR
Chrysanthemi Flos	MOL000422	kaempferol	DIO1
Chrysanthemi Flos	MOL000422	kaempferol	PPP3CA
Chrysanthemi Flos	MOL000422	kaempferol	GSTM1
Chrysanthemi Flos	MOL000422	kaempferol	GSTM2
Chrysanthemi Flos	MOL000422	kaempferol	AKR1C3
Chrysanthemi Flos	MOL000422	kaempferol	SLPI
Chrysanthemi Flos	MOL005100	5,7-dihydroxy-2-(3-hydroxy-4-methoxyphenyl)chroman-4-one	PTGS1
Chrysanthemi Flos	MOL005100	5,7-dihydroxy-2-(3-hydroxy-4-methoxyphenyl)chroman-4-one	PTGS2
Chrysanthemi Flos	MOL005100	5,7-dihydroxy-2-(3-hydroxy-4-methoxyphenyl)chroman-4-one	HSP90AA1
Chrysanthemi Flos	MOL005100	5,7-dihydroxy-2-(3-hydroxy-4-methoxyphenyl)chroman-4-one	CALM1
Chrysanthemi Flos	MOL005100	5,7-dihydroxy-2-(3-hydroxy-4-methoxyphenyl)chroman-4-one	SCN5A
Chrysanthemi Flos	MOL005100	5,7-dihydroxy-2-(3-hydroxy-4-methoxyphenyl)chroman-4-one	NCOA1
Chrysanthemi Flos	MOL000006	luteolin	PTGS1
Chrysanthemi Flos	MOL000006	luteolin	AR
Chrysanthemi Flos	MOL000006	luteolin	PTGS2
Chrysanthemi Flos	MOL000006	luteolin	HSP90AA1
Chrysanthemi Flos	MOL000006	luteolin	PRSS1
Chrysanthemi Flos	MOL000006	luteolin	NCOA2
Chrysanthemi Flos	MOL000006	luteolin	DPP4
Chrysanthemi Flos	MOL000006	luteolin	RELA
Chrysanthemi Flos	MOL000006	luteolin	EGFR
Chrysanthemi Flos	MOL000006	luteolin	VEGFA
Chrysanthemi Flos	MOL000006	luteolin	CCND1
Chrysanthemi Flos	MOL000006	luteolin	BCL2L1
Chrysanthemi Flos	MOL000006	luteolin	CDKN1A
Chrysanthemi Flos	MOL000006	luteolin	CASP9
Chrysanthemi Flos	MOL000006	luteolin	MMP2
Chrysanthemi Flos	MOL000006	luteolin	MMP9
Chrysanthemi Flos	MOL000006	luteolin	MAPK1
Chrysanthemi Flos	MOL000006	luteolin	IL10RB
Chrysanthemi Flos	MOL000006	luteolin	RB1
Chrysanthemi Flos	MOL000006	luteolin	CDK4
Chrysanthemi Flos	MOL000006	luteolin	TNFSF15
Chrysanthemi Flos	MOL000006	luteolin	JUN
Chrysanthemi Flos	MOL000006	luteolin	IL6
Chrysanthemi Flos	MOL000006	luteolin	TP63
Chrysanthemi Flos	MOL000006	luteolin	NFKBIA
Chrysanthemi Flos	MOL000006	luteolin	TOP1
Chrysanthemi Flos	MOL000006	luteolin	MDM2
Chrysanthemi Flos	MOL000006	luteolin	APP
Chrysanthemi Flos	MOL000006	luteolin	MMP1
Chrysanthemi Flos	MOL000006	luteolin	PCNA
Chrysanthemi Flos	MOL000006	luteolin	ERBB2
Chrysanthemi Flos	MOL000006	luteolin	PPARG
Chrysanthemi Flos	MOL000006	luteolin	HMOX1
Chrysanthemi Flos	MOL000006	luteolin	CASP7
Chrysanthemi Flos	MOL000006	luteolin	ICAM1
Chrysanthemi Flos	MOL000006	luteolin	MCL1
Chrysanthemi Flos	MOL000006	luteolin	IL2
Chrysanthemi Flos	MOL000006	luteolin	CCNB1
Chrysanthemi Flos	MOL000006	luteolin	TYR
Chrysanthemi Flos	MOL000006	luteolin	IFNGR1
Chrysanthemi Flos	MOL000006	luteolin	IL4
Chrysanthemi Flos	MOL000006	luteolin	TOP2A
Chrysanthemi Flos	MOL000006	luteolin	GSTP1
Chrysanthemi Flos	MOL000006	luteolin	XIAP
Chrysanthemi Flos	MOL000006	luteolin	SLC2A4
Chrysanthemi Flos	MOL000006	luteolin	INSRR
Chrysanthemi Flos	MOL000006	luteolin	CD40LG
Chrysanthemi Flos	MOL000006	luteolin	PTGES
Chrysanthemi Flos	MOL000006	luteolin	NUF2
Chrysanthemi Flos	MOL000006	luteolin	ADCY2
Chrysanthemi Flos	MOL000098	quercetin	PTGS1
Chrysanthemi Flos	MOL000098	quercetin	AR
Chrysanthemi Flos	MOL000098	quercetin	PPARG
Chrysanthemi Flos	MOL000098	quercetin	PTGS2
Chrysanthemi Flos	MOL000098	quercetin	HSP90AA1
Chrysanthemi Flos	MOL000098	quercetin	NCOA2
Chrysanthemi Flos	MOL000098	quercetin	DPP4
Chrysanthemi Flos	MOL000098	quercetin	AKR1B1
Chrysanthemi Flos	MOL000098	quercetin	PRSS1
Chrysanthemi Flos	MOL000098	quercetin	HTR
Chrysanthemi Flos	MOL000098	quercetin	KCNH2
Chrysanthemi Flos	MOL000098	quercetin	SCN5A
Chrysanthemi Flos	MOL000098	quercetin	ADRB2
Chrysanthemi Flos	MOL000098	quercetin	MMP3
Chrysanthemi Flos	MOL000098	quercetin	F7
Chrysanthemi Flos	MOL000098	quercetin	RXRA
Chrysanthemi Flos	MOL000098	quercetin	ACHE
Chrysanthemi Flos	MOL000098	quercetin	GABRA1
Chrysanthemi Flos	MOL000098	quercetin	MAOB
Chrysanthemi Flos	MOL000098	quercetin	RELA
Chrysanthemi Flos	MOL000098	quercetin	HTR
Chrysanthemi Flos	MOL000098	quercetin	KCNH2
Chrysanthemi Flos	MOL000098	quercetin	SCN5A
Chrysanthemi Flos	MOL000098	quercetin	ADRB2
Chrysanthemi Flos	MOL000098	quercetin	MMP3
Chrysanthemi Flos	MOL000098	quercetin	F7
Chrysanthemi Flos	MOL000098	quercetin	RXRA
Chrysanthemi Flos	MOL000098	quercetin	ACHE
Chrysanthemi Flos	MOL000098	quercetin	GABRA1
Chrysanthemi Flos	MOL000098	quercetin	MAOB
Chrysanthemi Flos	MOL000098	quercetin	RELA
Chrysanthemi Flos	MOL000098	quercetin	AKT1
Chrysanthemi Flos	MOL000098	quercetin	VEGFA
Chrysanthemi Flos	MOL000098	quercetin	CCND1
Chrysanthemi Flos	MOL000098	quercetin	BCL2
Chrysanthemi Flos	MOL000098	quercetin	BCL2L1
Chrysanthemi Flos	MOL000098	quercetin	FOS
Chrysanthemi Flos	MOL000098	quercetin	CDKN1A
Chrysanthemi Flos	MOL000098	quercetin	EIF6
Chrysanthemi Flos	MOL000098	quercetin	BAX
Chrysanthemi Flos	MOL000098	quercetin	CASP9
Chrysanthemi Flos	MOL000098	quercetin	PLAU
Chrysanthemi Flos	MOL000098	quercetin	MMP2
Chrysanthemi Flos	MOL000098	quercetin	MMP9
Chrysanthemi Flos	MOL000098	quercetin	MAPK1
Chrysanthemi Flos	MOL000098	quercetin	IL10RB
Chrysanthemi Flos	MOL000098	quercetin	VEGFA
Chrysanthemi Flos	MOL000098	quercetin	CCND1
Chrysanthemi Flos	MOL000098	quercetin	BCL2
Chrysanthemi Flos	MOL000098	quercetin	BCL2L1
Chrysanthemi Flos	MOL000098	quercetin	FOS
Chrysanthemi Flos	MOL000098	quercetin	CDKN1A
Chrysanthemi Flos	MOL000098	quercetin	EIF6
Chrysanthemi Flos	MOL000098	quercetin	BAX
Chrysanthemi Flos	MOL000098	quercetin	CASP9
Chrysanthemi Flos	MOL000098	quercetin	PLAU
Chrysanthemi Flos	MOL000098	quercetin	MMP2
Chrysanthemi Flos	MOL000098	quercetin	MMP9
Chrysanthemi Flos	MOL000098	quercetin	MAPK1
Chrysanthemi Flos	MOL000098	quercetin	IL10RB
Chrysanthemi Flos	MOL000098	quercetin	EGF
Chrysanthemi Flos	MOL000098	quercetin	RB1
Chrysanthemi Flos	MOL000098	quercetin	TNFSF15
Chrysanthemi Flos	MOL000098	quercetin	JUN
Chrysanthemi Flos	MOL000098	quercetin	IL6
Chrysanthemi Flos	MOL000098	quercetin	AHSA1
Chrysanthemi Flos	MOL000098	quercetin	CASP3
Chrysanthemi Flos	MOL000098	quercetin	TP63
Chrysanthemi Flos	MOL000098	quercetin	ELK1
Chrysanthemi Flos	MOL000098	quercetin	NFKBIA
Chrysanthemi Flos	MOL000098	quercetin	POR
Chrysanthemi Flos	MOL000098	quercetin	ODC1
Chrysanthemi Flos	MOL000098	quercetin	CASP8
Chrysanthemi Flos	MOL000098	quercetin	TOP1
Chrysanthemi Flos	MOL000098	quercetin	RAF1
Chrysanthemi Flos	MOL000098	quercetin	SOD1
Chrysanthemi Flos	MOL000098	quercetin	PRKCA
Chrysanthemi Flos	MOL000098	quercetin	MMP1
Chrysanthemi Flos	MOL000098	quercetin	HIF1A
Chrysanthemi Flos	MOL000098	quercetin	STAT1
Chrysanthemi Flos	MOL000098	quercetin	RUNX1T1
Chrysanthemi Flos	MOL000098	quercetin	CDK1
Chrysanthemi Flos	MOL000098	quercetin	HSPA5
Chrysanthemi Flos	MOL000098	quercetin	ERBB2
Chrysanthemi Flos	MOL000098	quercetin	PPARG
Chrysanthemi Flos	MOL000098	quercetin	ACACA
Chrysanthemi Flos	MOL000098	quercetin	HMOX1
Chrysanthemi Flos	MOL000098	quercetin	CYP3A4
Chrysanthemi Flos	MOL000098	quercetin	CYP1A2
Chrysanthemi Flos	MOL000098	quercetin	CAV1
Chrysanthemi Flos	MOL000098	quercetin	MYC
Chrysanthemi Flos	MOL000098	quercetin	F3
Chrysanthemi Flos	MOL000098	quercetin	GJA1
Chrysanthemi Flos	MOL000098	quercetin	CYP1A1
Chrysanthemi Flos	MOL000098	quercetin	ICAM1
Chrysanthemi Flos	MOL000098	quercetin	IL1B
Chrysanthemi Flos	MOL000098	quercetin	CCL2
Chrysanthemi Flos	MOL000098	quercetin	SELE
Chrysanthemi Flos	MOL000098	quercetin	VCAM1
Chrysanthemi Flos	MOL000098	quercetin	PTGER3
Chrysanthemi Flos	MOL000098	quercetin	IL8RA
Chrysanthemi Flos	MOL000098	quercetin	PRKCB
Chrysanthemi Flos	MOL000098	quercetin	BIRC5
Chrysanthemi Flos	MOL000098	quercetin	DUOX2
Chrysanthemi Flos	MOL000098	quercetin	NOS3
Chrysanthemi Flos	MOL000098	quercetin	HSPB1
Chrysanthemi Flos	MOL000098	quercetin	SULT1E1
Chrysanthemi Flos	MOL000098	quercetin	MGAM
Chrysanthemi Flos	MOL000098	quercetin	IL2
Chrysanthemi Flos	MOL000098	quercetin	NR1I2
Chrysanthemi Flos	MOL000098	quercetin	CYP1B1
Chrysanthemi Flos	MOL000098	quercetin	CCNB1
Chrysanthemi Flos	MOL000098	quercetin	PLAT
Chrysanthemi Flos	MOL000098	quercetin	THBD
Chrysanthemi Flos	MOL000098	quercetin	SERPINE1
Chrysanthemi Flos	MOL000098	quercetin	IFNGR1
Chrysanthemi Flos	MOL000098	quercetin	ALOX5
Chrysanthemi Flos	MOL000098	quercetin	IL1A
Chrysanthemi Flos	MOL000098	quercetin	MPO
Chrysanthemi Flos	MOL000098	quercetin	TOP2A
Chrysanthemi Flos	MOL000098	quercetin	NCF1
Chrysanthemi Flos	MOL000098	quercetin	ABCG2
Chrysanthemi Flos	MOL000098	quercetin	HAS2
Chrysanthemi Flos	MOL000098	quercetin	GSTP1
Chrysanthemi Flos	MOL000098	quercetin	NFE2L2
Chrysanthemi Flos	MOL000098	quercetin	NQO1
Chrysanthemi Flos	MOL000098	quercetin	PARP1
Chrysanthemi Flos	MOL000098	quercetin	AHR
Chrysanthemi Flos	MOL000098	quercetin	SLC2A4
Chrysanthemi Flos	MOL000098	quercetin	COL3A1
Chrysanthemi Flos	MOL000098	quercetin	CXCL11
Chrysanthemi Flos	MOL000098	quercetin	CXCL2
Chrysanthemi Flos	MOL000098	quercetin	DCAF5
Chrysanthemi Flos	MOL000098	quercetin	NR1I3
Chrysanthemi Flos	MOL000098	quercetin	CHEK2
Chrysanthemi Flos	MOL000098	quercetin	INSRR
Chrysanthemi Flos	MOL000098	quercetin	CLDN4
Chrysanthemi Flos	MOL000098	quercetin	PPARA
Chrysanthemi Flos	MOL000098	quercetin	PPARD
Chrysanthemi Flos	MOL000098	quercetin	HSF1
Chrysanthemi Flos	MOL000098	quercetin	CRP
Chrysanthemi Flos	MOL000098	quercetin	CHUK
Chrysanthemi Flos	MOL000098	quercetin	SPP1
Chrysanthemi Flos	MOL000098	quercetin	RUNX2
Chrysanthemi Flos	MOL000098	quercetin	RASSF1
Chrysanthemi Flos	MOL000098	quercetin	E2F1
Chrysanthemi Flos	MOL000098	quercetin	E2F2
Chrysanthemi Flos	MOL000098	quercetin	ACPP
Chrysanthemi Flos	MOL000098	quercetin	CTSD
Chrysanthemi Flos	MOL000098	quercetin	IGFBP3
Chrysanthemi Flos	MOL000098	quercetin	IGF2
Chrysanthemi Flos	MOL000098	quercetin	CD40LG
Chrysanthemi Flos	MOL000098	quercetin	IRF1
Chrysanthemi Flos	MOL000098	quercetin	ERBB3
Chrysanthemi Flos	MOL000098	quercetin	PON1
Chrysanthemi Flos	MOL000098	quercetin	PCOLCE
Chrysanthemi Flos	MOL000098	quercetin	NPEPPS
Chrysanthemi Flos	MOL000098	quercetin	HK2
Chrysanthemi Flos	MOL000098	quercetin	RASA1
Chrysanthemi Flos	MOL000098	quercetin	GSTM1
Chrysanthemi Flos	MOL000098	quercetin	GSTM2
Rehmanniae Radix Praeparata	MOL000449	Stigmasterol	CTRB1
Rehmanniae Radix Praeparata	MOL000449	Stigmasterol	CHRM3
Rehmanniae Radix Praeparata	MOL000449	Stigmasterol	CHRM1
Rehmanniae Radix Praeparata	MOL000449	Stigmasterol	ADRB1
Rehmanniae Radix Praeparata	MOL000449	Stigmasterol	SCN5A
Rehmanniae Radix Praeparata	MOL000449	Stigmasterol	ADRA1A
Rehmanniae Radix Praeparata	MOL000449	Stigmasterol	CHRM2
Rehmanniae Radix Praeparata	MOL000449	Stigmasterol	ADRA1B
Rehmanniae Radix Praeparata	MOL000449	Stigmasterol	GABRA1
Rehmanniae Radix Praeparata	MOL000449	Stigmasterol	IGHG1
Rehmanniae Radix Praeparata	MOL000449	Stigmasterol	RXRA
Rehmanniae Radix Praeparata	MOL000449	Stigmasterol	NCOA1
Rehmanniae Radix Praeparata	MOL000449	Stigmasterol	PTGS1
Rehmanniae Radix Praeparata	MOL000449	Stigmasterol	PTGS2
Rehmanniae Radix Praeparata	MOL000449	Stigmasterol	ADRA2A
Rehmanniae Radix Praeparata	MOL000449	Stigmasterol	SLC6A2
Rehmanniae Radix Praeparata	MOL000449	Stigmasterol	SLC6A3
Rehmanniae Radix Praeparata	MOL000449	Stigmasterol	ADRB2
Rehmanniae Radix Praeparata	MOL000449	Stigmasterol	AKR1B1
Rehmanniae Radix Praeparata	MOL000449	Stigmasterol	PLAU
Rehmanniae Radix Praeparata	MOL000449	Stigmasterol	LTA4H
Rehmanniae Radix Praeparata	MOL000449	Stigmasterol	MAOB
Rehmanniae Radix Praeparata	MOL000449	Stigmasterol	MAOA
Rehmanniae Radix Praeparata	MOL000449	Stigmasterol	PGR
Rehmanniae Radix Praeparata	MOL000449	Stigmasterol	NR3C2
Rehmanniae Radix Praeparata	MOL000449	Stigmasterol	NCOA2
Rehmanniae Radix Praeparata	MOL000359	sitosterol	PGR
Rehmanniae Radix Praeparata	MOL000359	sitosterol	NCOA2
Anemarrhenae Rhizoma	MOL000631	coumaroyltyramine	PTGS2
Anemarrhenae Rhizoma	MOL000631	coumaroyltyramine	ADRB2
Anemarrhenae Rhizoma	MOL000631	coumaroyltyramine	HSP90AA1
Anemarrhenae Rhizoma	MOL000631	coumaroyltyramine	LTA4H
Anemarrhenae Rhizoma	MOL000631	coumaroyltyramine	MAOB
Anemarrhenae Rhizoma	MOL000631	coumaroyltyramine	PKIA
Anemarrhenae Rhizoma	MOL000631	coumaroyltyramine	PTGS1
Anemarrhenae Rhizoma	MOL000546	diosgenin	AKT1
Anemarrhenae Rhizoma	MOL000546	diosgenin	VEGFA
Anemarrhenae Rhizoma	MOL000546	diosgenin	CDKN1A
Anemarrhenae Rhizoma	MOL000546	diosgenin	TP63
Anemarrhenae Rhizoma	MOL000546	diosgenin	PTGS2
Anemarrhenae Rhizoma	MOL000546	diosgenin	FASN
Anemarrhenae Rhizoma	MOL000546	diosgenin	SOD1
Anemarrhenae Rhizoma	MOL000546	diosgenin	CAT
Anemarrhenae Rhizoma	MOL000546	diosgenin	HIF1A
Anemarrhenae Rhizoma	MOL000546	diosgenin	NR1I2
Anemarrhenae Rhizoma	MOL000546	diosgenin	PLA2G4A
Anemarrhenae Rhizoma	MOL000546	diosgenin	ABCC2
Anemarrhenae Rhizoma	MOL000546	diosgenin	MTOR
Anemarrhenae Rhizoma	MOL000631	coumaroyltyramine	CHRM1
Anemarrhenae Rhizoma	MOL000631	coumaroyltyramine	ADRB1
Anemarrhenae Rhizoma	MOL000483	(Z)-3-(4-hydroxy-3-methoxy-phenyl)-N-[2-(4-hydroxyphenyl)ethyl]acrylamide	LTA4H
Anemarrhenae Rhizoma	MOL000483	(Z)-3-(4-hydroxy-3-methoxy-phenyl)-N-[2-(4-hydroxyphenyl)ethyl]acrylamide	CALM1
Anemarrhenae Rhizoma	MOL000546	diosgenin	PGR
Anemarrhenae Rhizoma	MOL000546	diosgenin	NR3C2
Anemarrhenae Rhizoma	MOL000546	diosgenin	RELA
Anemarrhenae Rhizoma	MOL004540	Anemarsaponin C_qt	PGR
Anemarrhenae Rhizoma	MOL004540	Anemarsaponin C_qt	NR3C2
Anemarrhenae Rhizoma	MOL004540	Anemarsaponin C_qt	NR3C1
Anemarrhenae Rhizoma	MOL000483	(Z)-3-(4-hydroxy-3-methoxy-phenyl)-N-[2-(4-hydroxyphenyl)ethyl]acrylamide	PTGS1
Anemarrhenae Rhizoma	MOL000483	(Z)-3-(4-hydroxy-3-methoxy-phenyl)-N-[2-(4-hydroxyphenyl)ethyl]acrylamide	PTGS2
Anemarrhenae Rhizoma	MOL000483	(Z)-3-(4-hydroxy-3-methoxy-phenyl)-N-[2-(4-hydroxyphenyl)ethyl]acrylamide	ADRA1B
Anemarrhenae Rhizoma	MOL000483	(Z)-3-(4-hydroxy-3-methoxy-phenyl)-N-[2-(4-hydroxyphenyl)ethyl]acrylamide	ADRB2
Anemarrhenae Rhizoma	MOL000483	(Z)-3-(4-hydroxy-3-methoxy-phenyl)-N-[2-(4-hydroxyphenyl)ethyl]acrylamide	HSP90AA1
Anemarrhenae Rhizoma	MOL000449	Stigmasterol	SCN5A
Anemarrhenae Rhizoma	MOL000449	Stigmasterol	ADRA1A
Anemarrhenae Rhizoma	MOL000449	Stigmasterol	CHRM2
Anemarrhenae Rhizoma	MOL000449	Stigmasterol	ADRA1B
Anemarrhenae Rhizoma	MOL000449	Stigmasterol	GABRA1
Anemarrhenae Rhizoma	MOL000449	Stigmasterol	PTGS2
Anemarrhenae Rhizoma	MOL000449	Stigmasterol	ADRA2A
Anemarrhenae Rhizoma	MOL000449	Stigmasterol	SLC6A2
Anemarrhenae Rhizoma	MOL000449	Stigmasterol	SLC6A3
Anemarrhenae Rhizoma	MOL000449	Stigmasterol	ADRB2
Anemarrhenae Rhizoma	MOL000449	Stigmasterol	AKR1B1
Anemarrhenae Rhizoma	MOL000449	Stigmasterol	PLAU
Anemarrhenae Rhizoma	MOL000449	Stigmasterol	LTA4H
Anemarrhenae Rhizoma	MOL000449	Stigmasterol	MAOB
Anemarrhenae Rhizoma	MOL000449	Stigmasterol	MAOA
Anemarrhenae Rhizoma	MOL000449	Stigmasterol	CTRB1
Anemarrhenae Rhizoma	MOL000449	Stigmasterol	CHRM3
Anemarrhenae Rhizoma	MOL000449	Stigmasterol	CHRM1
Anemarrhenae Rhizoma	MOL000449	Stigmasterol	ADRB1
Anemarrhenae Rhizoma	MOL000449	Stigmasterol	PGR
Anemarrhenae Rhizoma	MOL000449	Stigmasterol	NR3C2
Anemarrhenae Rhizoma	MOL000449	Stigmasterol	NCOA2
Anemarrhenae Rhizoma	MOL000449	Stigmasterol	ADH1C
Anemarrhenae Rhizoma	MOL000449	Stigmasterol	IGHG1
Anemarrhenae Rhizoma	MOL000449	Stigmasterol	RXRA
Anemarrhenae Rhizoma	MOL000449	Stigmasterol	NCOA1
Anemarrhenae Rhizoma	MOL000449	Stigmasterol	PTGS1
Anemarrhenae Rhizoma	MOL004514	Timosaponin B III_qt	PGR
Anemarrhenae Rhizoma	MOL004514	Timosaponin B III_qt	NR3C1
Anemarrhenae Rhizoma	MOL004497	Hippeastrine	CHRM3
Anemarrhenae Rhizoma	MOL004497	Hippeastrine	CHRM1
Anemarrhenae Rhizoma	MOL004497	Hippeastrine	AR
Anemarrhenae Rhizoma	MOL004497	Hippeastrine	SCN5A
Anemarrhenae Rhizoma	MOL004497	Hippeastrine	OPRD1
Anemarrhenae Rhizoma	MOL004497	Hippeastrine	ADRA1B
Anemarrhenae Rhizoma	MOL004497	Hippeastrine	OPRM1
Anemarrhenae Rhizoma	MOL004497	Hippeastrine	GABRA1
Anemarrhenae Rhizoma	MOL004497	Hippeastrine	HSP90AA1
Anemarrhenae Rhizoma	MOL004489	Anemarsaponin F_qt	NR3C1
Anemarrhenae Rhizoma	MOL004373	Anhydroicaritin	IGHG1
Anemarrhenae Rhizoma	MOL004373	Anhydroicaritin	MAPK14
Anemarrhenae Rhizoma	MOL004373	Anhydroicaritin	GSK3B
Anemarrhenae Rhizoma	MOL004373	Anhydroicaritin	HSP90AA1
Anemarrhenae Rhizoma	MOL004373	Anhydroicaritin	CDK2
Anemarrhenae Rhizoma	MOL004373	Anhydroicaritin	CHEK1
Anemarrhenae Rhizoma	MOL004373	Anhydroicaritin	RXRB
Anemarrhenae Rhizoma	MOL004373	Anhydroicaritin	PRSS1
Anemarrhenae Rhizoma	MOL004373	Anhydroicaritin	NCOA2
Anemarrhenae Rhizoma	MOL004373	Anhydroicaritin	CALM1
Anemarrhenae Rhizoma	MOL004373	Anhydroicaritin	F7
Anemarrhenae Rhizoma	MOL004373	Anhydroicaritin	KDR
Anemarrhenae Rhizoma	MOL004373	Anhydroicaritin	CCNA2
Anemarrhenae Rhizoma	MOL004373	Anhydroicaritin	NCOA1
Anemarrhenae Rhizoma	MOL004373	Anhydroicaritin	CHRM1
Anemarrhenae Rhizoma	MOL004373	Anhydroicaritin	ESR1
Anemarrhenae Rhizoma	MOL004373	Anhydroicaritin	AR
Anemarrhenae Rhizoma	MOL004373	Anhydroicaritin	SCN5A
Anemarrhenae Rhizoma	MOL004373	Anhydroicaritin	PPARG
Anemarrhenae Rhizoma	MOL004373	Anhydroicaritin	CHRM5
Anemarrhenae Rhizoma	MOL004373	Anhydroicaritin	PTGS2
Anemarrhenae Rhizoma	MOL004373	Anhydroicaritin	RXRA
Anemarrhenae Rhizoma	MOL004373	Anhydroicaritin	ACHE
Anemarrhenae Rhizoma	MOL004373	Anhydroicaritin	ADRA1B
Anemarrhenae Rhizoma	MOL004373	Anhydroicaritin	ADRB2
Anemarrhenae Rhizoma	MOL004373	Anhydroicaritin	ESR2
Anemarrhenae Rhizoma	MOL004373	Anhydroicaritin	DPP4
Anemarrhenae Rhizoma	MOL000422	kaempferol	PPP3CA
Anemarrhenae Rhizoma	MOL000422	kaempferol	GSTM1
Anemarrhenae Rhizoma	MOL000422	kaempferol	GSTM2
Anemarrhenae Rhizoma	MOL000422	kaempferol	AKR1C3
Anemarrhenae Rhizoma	MOL000422	kaempferol	SLPI
Anemarrhenae Rhizoma	MOL004373	Anhydroicaritin	PTGS1
Anemarrhenae Rhizoma	MOL004373	Anhydroicaritin	CHRM3
Anemarrhenae Rhizoma	MOL004373	Anhydroicaritin	HTR
Anemarrhenae Rhizoma	MOL004373	Anhydroicaritin	KCNH2
Anemarrhenae Rhizoma	MOL000422	kaempferol	CYP1A1
Anemarrhenae Rhizoma	MOL000422	kaempferol	ICAM1
Anemarrhenae Rhizoma	MOL000422	kaempferol	SELE
Anemarrhenae Rhizoma	MOL000422	kaempferol	VCAM1
Anemarrhenae Rhizoma	MOL000422	kaempferol	NR1I2
Anemarrhenae Rhizoma	MOL000422	kaempferol	CYP1B1
Anemarrhenae Rhizoma	MOL000422	kaempferol	ALOX5
Anemarrhenae Rhizoma	MOL000422	kaempferol	HAS2
Anemarrhenae Rhizoma	MOL000422	kaempferol	GSTP1
Anemarrhenae Rhizoma	MOL000422	kaempferol	AHR
Anemarrhenae Rhizoma	MOL000422	kaempferol	PSMD3
Anemarrhenae Rhizoma	MOL000422	kaempferol	NR1I3
Anemarrhenae Rhizoma	MOL000422	kaempferol	INSRR
Anemarrhenae Rhizoma	MOL000422	kaempferol	DIO1
Anemarrhenae Rhizoma	MOL000422	kaempferol	BCL2
Anemarrhenae Rhizoma	MOL000422	kaempferol	BAX
Anemarrhenae Rhizoma	MOL000422	kaempferol	TNFSF15
Anemarrhenae Rhizoma	MOL000422	kaempferol	JUN
Anemarrhenae Rhizoma	MOL000422	kaempferol	AHSA1
Anemarrhenae Rhizoma	MOL000422	kaempferol	CASP3
Anemarrhenae Rhizoma	MOL000422	kaempferol	MAPK8
Anemarrhenae Rhizoma	MOL000422	kaempferol	MMP1
Anemarrhenae Rhizoma	MOL000422	kaempferol	STAT1
Anemarrhenae Rhizoma	MOL000422	kaempferol	CDK1
Anemarrhenae Rhizoma	MOL000422	kaempferol	PPARG
Anemarrhenae Rhizoma	MOL000422	kaempferol	HMOX1
Anemarrhenae Rhizoma	MOL000422	kaempferol	CYP3A4
Anemarrhenae Rhizoma	MOL000422	kaempferol	HTR
Anemarrhenae Rhizoma	MOL000422	kaempferol	CHRM1
Anemarrhenae Rhizoma	MOL000422	kaempferol	ACHE
Anemarrhenae Rhizoma	MOL000422	kaempferol	SLC6A2
Anemarrhenae Rhizoma	MOL000422	kaempferol	CHRM2
Anemarrhenae Rhizoma	MOL000422	kaempferol	ADRA1B
Anemarrhenae Rhizoma	MOL000422	kaempferol	GABRA1
Anemarrhenae Rhizoma	MOL000422	kaempferol	F7
Anemarrhenae Rhizoma	MOL000422	kaempferol	CALM1
Anemarrhenae Rhizoma	MOL000422	kaempferol	RELA
Anemarrhenae Rhizoma	MOL000422	kaempferol	IKBKB
Anemarrhenae Rhizoma	MOL000422	kaempferol	PTGS1
Anemarrhenae Rhizoma	MOL000422	kaempferol	AR
Anemarrhenae Rhizoma	MOL000422	kaempferol	PPARG
Anemarrhenae Rhizoma	MOL000422	kaempferol	PTGS2
Anemarrhenae Rhizoma	MOL000422	kaempferol	HSP90AA1
Anemarrhenae Rhizoma	MOL000422	kaempferol	NCOA2
Anemarrhenae Rhizoma	MOL000422	kaempferol	DPP4
Anemarrhenae Rhizoma	MOL000422	kaempferol	PRSS1
Anemarrhenae Rhizoma	MOL001677	asperglaucide	HTR
Anemarrhenae Rhizoma	MOL001677	asperglaucide	KCNH2
Anemarrhenae Rhizoma	MOL001677	asperglaucide	PTGS2
Anemarrhenae Rhizoma	MOL001677	asperglaucide	PRSS1
Paeoniae Radix Alba	MOL001918	paeoniflorgenone	GABRA1
Paeoniae Radix Alba	MOL001919	(3S,5R,8R,9R,10S,14S)-3,17-dihydroxy-4,4,8,10,14-pentamethyl-2,3,5,6,7,9-hexahydro-1H-cyclopenta[a]phenanthrene-15,16-dione	PGR
Paeoniae Radix Alba	MOL001919	(3S,5R,8R,9R,10S,14S)-3,17-dihydroxy-4,4,8,10,14-pentamethyl-2,3,5,6,7,9-hexahydro-1H-cyclopenta[a]phenanthrene-15,16-dione	NR3C2
Paeoniae Radix Alba	MOL001924	paeoniflorin	TNFSF15
Paeoniae Radix Alba	MOL001924	paeoniflorin	IL6
Paeoniae Radix Alba	MOL001924	paeoniflorin	CD14
Paeoniae Radix Alba	MOL001924	paeoniflorin	LBP
Paeoniae Radix Alba	MOL000211	Mairin	PGR
Paeoniae Radix Alba	MOL000358	beta-sitosterol	PGR
Paeoniae Radix Alba	MOL000358	beta-sitosterol	NCOA2
Paeoniae Radix Alba	MOL000358	beta-sitosterol	PTGS1
Paeoniae Radix Alba	MOL000358	beta-sitosterol	PTGS2
Paeoniae Radix Alba	MOL000358	beta-sitosterol	HSP90AA1
Paeoniae Radix Alba	MOL000358	beta-sitosterol	KCNH2
Paeoniae Radix Alba	MOL000358	beta-sitosterol	DRD1
Paeoniae Radix Alba	MOL000358	beta-sitosterol	CHRM3
Paeoniae Radix Alba	MOL000358	beta-sitosterol	CHRM1
Paeoniae Radix Alba	MOL000358	beta-sitosterol	SCN5A
Paeoniae Radix Alba	MOL000358	beta-sitosterol	CHRM4
Paeoniae Radix Alba	MOL000358	beta-sitosterol	ADRA1A
Paeoniae Radix Alba	MOL000358	beta-sitosterol	CHRM2
Paeoniae Radix Alba	MOL000358	beta-sitosterol	ADRA1B
Paeoniae Radix Alba	MOL000358	beta-sitosterol	ADRB2
Paeoniae Radix Alba	MOL000358	beta-sitosterol	CHRNA2
Paeoniae Radix Alba	MOL000358	beta-sitosterol	SLC6A4
Paeoniae Radix Alba	MOL000358	beta-sitosterol	OPRM1
Paeoniae Radix Alba	MOL000358	beta-sitosterol	GABRA1
Paeoniae Radix Alba	MOL000358	beta-sitosterol	BCL2
Paeoniae Radix Alba	MOL000358	beta-sitosterol	BAX
Paeoniae Radix Alba	MOL000358	beta-sitosterol	CASP9
Paeoniae Radix Alba	MOL000358	beta-sitosterol	JUN
Paeoniae Radix Alba	MOL000358	beta-sitosterol	CASP3
Paeoniae Radix Alba	MOL000358	beta-sitosterol	CASP8
Paeoniae Radix Alba	MOL000358	beta-sitosterol	PRKCA
Paeoniae Radix Alba	MOL000358	beta-sitosterol	PON1
Paeoniae Radix Alba	MOL000358	beta-sitosterol	MAP2
Paeoniae Radix Alba	MOL000359	sitosterol	PGR
Paeoniae Radix Alba	MOL000359	sitosterol	NCOA2
Paeoniae Radix Alba	MOL000359	sitosterol	NR3C2
Paeoniae Radix Alba	MOL000422	kaempferol	NOS2
Paeoniae Radix Alba	MOL000422	kaempferol	PTGS1
Paeoniae Radix Alba	MOL000422	kaempferol	AR
Paeoniae Radix Alba	MOL000422	kaempferol	PPARG
Paeoniae Radix Alba	MOL000422	kaempferol	PTGS2
Paeoniae Radix Alba	MOL000422	kaempferol	HSP90AA1
Paeoniae Radix Alba	MOL000422	kaempferol	NCOA2
Paeoniae Radix Alba	MOL000422	kaempferol	DPP4
Paeoniae Radix Alba	MOL000422	kaempferol	PRSS1
Paeoniae Radix Alba	MOL000422	kaempferol	PGR
Paeoniae Radix Alba	MOL000422	kaempferol	HTR
Paeoniae Radix Alba	MOL000422	kaempferol	CHRM1
Paeoniae Radix Alba	MOL000422	kaempferol	ACHE
Paeoniae Radix Alba	MOL000422	kaempferol	SLC6A2
Paeoniae Radix Alba	MOL000422	kaempferol	CHRM2
Paeoniae Radix Alba	MOL000422	kaempferol	ADRA1B
Paeoniae Radix Alba	MOL000422	kaempferol	GABRA1
Paeoniae Radix Alba	MOL000422	kaempferol	F7
Paeoniae Radix Alba	MOL000422	kaempferol	CALM1
Paeoniae Radix Alba	MOL000422	kaempferol	RELA
Paeoniae Radix Alba	MOL000422	kaempferol	IKBKB
Paeoniae Radix Alba	MOL000422	kaempferol	AKT1
Paeoniae Radix Alba	MOL000422	kaempferol	BCL2
Paeoniae Radix Alba	MOL000422	kaempferol	BAX
Paeoniae Radix Alba	MOL000422	kaempferol	TNFSF15
Paeoniae Radix Alba	MOL000422	kaempferol	JUN
Paeoniae Radix Alba	MOL000422	kaempferol	AHSA1
Paeoniae Radix Alba	MOL000422	kaempferol	CASP3
Paeoniae Radix Alba	MOL000422	kaempferol	MAPK8
Paeoniae Radix Alba	MOL000422	kaempferol	MMP1
Paeoniae Radix Alba	MOL000422	kaempferol	STAT1
Paeoniae Radix Alba	MOL000422	kaempferol	CDK1
Paeoniae Radix Alba	MOL000422	kaempferol	PPARG
Paeoniae Radix Alba	MOL000422	kaempferol	HMOX1
Paeoniae Radix Alba	MOL000422	kaempferol	CYP3A4
Paeoniae Radix Alba	MOL000422	kaempferol	CYP1A2
Paeoniae Radix Alba	MOL000422	kaempferol	CYP1A1
Paeoniae Radix Alba	MOL000422	kaempferol	ICAM1
Paeoniae Radix Alba	MOL000422	kaempferol	SELE
Paeoniae Radix Alba	MOL000422	kaempferol	GSTM2
Paeoniae Radix Alba	MOL000422	kaempferol	AKR1C3
Paeoniae Radix Alba	MOL000422	kaempferol	SLPI
Paeoniae Radix Alba	MOL000492	(+) - catechins	PTGS1
Paeoniae Radix Alba	MOL000492	(+) - catechins	ESR1
Paeoniae Radix Alba	MOL000492	(+) - catechins	PTGS2
Paeoniae Radix Alba	MOL000492	(+) - catechins	HSP90AA1
Paeoniae Radix Alba	MOL000492	(+) - catechins	NCOA2
Paeoniae Radix Alba	MOL000492	(+) - catechins	CALM1
Paeoniae Radix Alba	MOL000492	(+) - catechins	RXRA
Paeoniae Radix Alba	MOL000492	(+) - catechins	CAT
Paeoniae Radix Alba	MOL000492	(+) - catechins	HAS2
Radix Bupleuri	MOL000449	Stigmasterol	PGR
Radix Bupleuri	MOL000449	Stigmasterol	NR3C2
Radix Bupleuri	MOL000449	Stigmasterol	NCOA2
Radix Bupleuri	MOL000449	Stigmasterol	ADH1C
Radix Bupleuri	MOL000449	Stigmasterol	RXRA
Radix Bupleuri	MOL000449	Stigmasterol	NCOA1
Radix Bupleuri	MOL000449	Stigmasterol	PTGS1
Radix Bupleuri	MOL000449	Stigmasterol	PTGS2
Radix Bupleuri	MOL000449	Stigmasterol	ADRA2A
Radix Bupleuri	MOL000449	Stigmasterol	SLC6A2
Radix Bupleuri	MOL000449	Stigmasterol	SLC6A3
Radix Bupleuri	MOL000449	Stigmasterol	ADRB2
Radix Bupleuri	MOL000449	Stigmasterol	AKR1B1
Radix Bupleuri	MOL000449	Stigmasterol	PLAU
Radix Bupleuri	MOL000449	Stigmasterol	LTA4H
Radix Bupleuri	MOL000449	Stigmasterol	MAOB
Radix Bupleuri	MOL000449	Stigmasterol	MAOA
Radix Bupleuri	MOL000449	Stigmasterol	CHRM3
Radix Bupleuri	MOL000449	Stigmasterol	CHRM1
Radix Bupleuri	MOL000449	Stigmasterol	ADRB1
Radix Bupleuri	MOL000449	Stigmasterol	SCN5A
Radix Bupleuri	MOL000449	Stigmasterol	ADRA1A
Radix Bupleuri	MOL000449	Stigmasterol	CHRM2
Radix Bupleuri	MOL000449	Stigmasterol	ADRA1B
Radix Bupleuri	MOL000449	Stigmasterol	GABRA1
Radix Bupleuri	MOL000354	isorhamnetin	PTGS1
Radix Bupleuri	MOL000354	isorhamnetin	ESR1
Radix Bupleuri	MOL000354	isorhamnetin	AR
Radix Bupleuri	MOL000354	isorhamnetin	PPARG
Radix Bupleuri	MOL000354	isorhamnetin	PTGS2
Radix Bupleuri	MOL000354	isorhamnetin	ESR2
Radix Bupleuri	MOL000354	isorhamnetin	DPP4
Radix Bupleuri	MOL000354	isorhamnetin	MAPK14
Radix Bupleuri	MOL000354	isorhamnetin	GSK3B
Radix Bupleuri	MOL000354	isorhamnetin	HSP90AA1
Radix Bupleuri	MOL000354	isorhamnetin	CDK2
Radix Bupleuri	MOL000354	isorhamnetin	PRSS1
Radix Bupleuri	MOL000354	isorhamnetin	NCOA2
Radix Bupleuri	MOL000354	isorhamnetin	CALM1
Radix Bupleuri	MOL000354	isorhamnetin	PPARD
Radix Bupleuri	MOL000354	isorhamnetin	CHEK1
Radix Bupleuri	MOL000354	isorhamnetin	AKR1B1
Radix Bupleuri	MOL000354	isorhamnetin	NCOA1
Radix Bupleuri	MOL000354	isorhamnetin	F7
Radix Bupleuri	MOL000354	isorhamnetin	HTR
Radix Bupleuri	MOL000354	isorhamnetin	ACHE
Radix Bupleuri	MOL000354	isorhamnetin	GABRA1
Radix Bupleuri	MOL000354	isorhamnetin	MAOB
Radix Bupleuri	MOL000354	isorhamnetin	GRIA2
Radix Bupleuri	MOL000354	isorhamnetin	RELA
Radix Bupleuri	MOL000354	isorhamnetin	NCF1
Radix Bupleuri	MOL000354	isorhamnetin	OLR1
Radix Bupleuri	MOL000422	kaempferol	PTGS1
Radix Bupleuri	MOL000422	kaempferol	AR
Radix Bupleuri	MOL000422	kaempferol	PPARG
Radix Bupleuri	MOL000422	kaempferol	PTGS2
Radix Bupleuri	MOL000422	kaempferol	HSP90AA1
Radix Bupleuri	MOL000422	kaempferol	DPP4
Radix Bupleuri	MOL000422	kaempferol	PRSS1
Radix Bupleuri	MOL000422	kaempferol	PGR
Radix Bupleuri	MOL000422	kaempferol	HTR
Radix Bupleuri	MOL000422	kaempferol	CHRM1
Radix Bupleuri	MOL000422	kaempferol	ACHE
Radix Bupleuri	MOL000422	kaempferol	SLC6A2
Radix Bupleuri	MOL000422	kaempferol	CHRM2
Radix Bupleuri	MOL000422	kaempferol	ADRA1B
Radix Bupleuri	MOL000422	kaempferol	GABRA1
Radix Bupleuri	MOL000422	kaempferol	F7
Radix Bupleuri	MOL000422	kaempferol	RELA
Radix Bupleuri	MOL000422	kaempferol	IKBKB
Radix Bupleuri	MOL000422	kaempferol	AKT1
Radix Bupleuri	MOL000422	kaempferol	BCL2
Radix Bupleuri	MOL000422	kaempferol	BAX
Radix Bupleuri	MOL000422	kaempferol	TNFSF15
Radix Bupleuri	MOL000422	kaempferol	JUN
Radix Bupleuri	MOL000422	kaempferol	AHSA1
Radix Bupleuri	MOL000422	kaempferol	CASP3
Radix Bupleuri	MOL000422	kaempferol	MAPK8
Radix Bupleuri	MOL000422	kaempferol	MMP1
Radix Bupleuri	MOL000422	kaempferol	STAT1
Radix Bupleuri	MOL000422	kaempferol	CDK1
Radix Bupleuri	MOL000422	kaempferol	HMOX1
Radix Bupleuri	MOL000422	kaempferol	CYP3A4
Radix Bupleuri	MOL000422	kaempferol	CYP1A2
Radix Bupleuri	MOL000422	kaempferol	CYP1A1
Radix Bupleuri	MOL000422	kaempferol	ICAM1
Radix Bupleuri	MOL000422	kaempferol	SELE
Radix Bupleuri	MOL000422	kaempferol	VCAM1
Radix Bupleuri	MOL000422	kaempferol	NR1I2
Radix Bupleuri	MOL000422	kaempferol	CYP1B1
Radix Bupleuri	MOL000422	kaempferol	ALOX5
Radix Bupleuri	MOL000422	kaempferol	HAS2
Radix Bupleuri	MOL000422	kaempferol	GSTP1
Radix Bupleuri	MOL000422	kaempferol	AHR
Radix Bupleuri	MOL000422	kaempferol	PSMD3
Radix Bupleuri	MOL000422	kaempferol	NR1I3
Radix Bupleuri	MOL000422	kaempferol	INSRR
Radix Bupleuri	MOL000422	kaempferol	DIO1
Radix Bupleuri	MOL000422	kaempferol	PPP3CA
Radix Bupleuri	MOL000422	kaempferol	GSTM1
Radix Bupleuri	MOL000422	kaempferol	GSTM2
Radix Bupleuri	MOL000422	kaempferol	AKR1C3
Radix Bupleuri	MOL000422	kaempferol	SLPI
Radix Bupleuri	MOL004598	3,5,6,7-tetramethoxy-2-(3,4,5-trimethoxyphenyl)chromone	HTR
Radix Bupleuri	MOL004598	3,5,6,7-tetramethoxy-2-(3,4,5-trimethoxyphenyl)chromone	AR
Radix Bupleuri	MOL004598	3,5,6,7-tetramethoxy-2-(3,4,5-trimethoxyphenyl)chromone	PTGS2
Radix Bupleuri	MOL004598	3,5,6,7-tetramethoxy-2-(3,4,5-trimethoxyphenyl)chromone	F7
Radix Bupleuri	MOL004598	3,5,6,7-tetramethoxy-2-(3,4,5-trimethoxyphenyl)chromone	ACHE
Radix Bupleuri	MOL004598	3,5,6,7-tetramethoxy-2-(3,4,5-trimethoxyphenyl)chromone	ESR2
Radix Bupleuri	MOL004598	3,5,6,7-tetramethoxy-2-(3,4,5-trimethoxyphenyl)chromone	PRSS1
Radix Bupleuri	MOL004598	3,5,6,7-tetramethoxy-2-(3,4,5-trimethoxyphenyl)chromone	NCOA2
Radix Bupleuri	MOL004598	3,5,6,7-tetramethoxy-2-(3,4,5-trimethoxyphenyl)chromone	CALM1
Radix Bupleuri	MOL004609	Areapillin	HTR
Radix Bupleuri	MOL004609	Areapillin	AR
Radix Bupleuri	MOL004609	Areapillin	SCN5A
Radix Bupleuri	MOL004609	Areapillin	PTGS2
Radix Bupleuri	MOL004609	Areapillin	F7
Radix Bupleuri	MOL004609	Areapillin	ESR2
Radix Bupleuri	MOL004609	Areapillin	HSP90AA1
Radix Bupleuri	MOL004609	Areapillin	IGHG1
Radix Bupleuri	MOL004609	Areapillin	PRSS1
Radix Bupleuri	MOL004609	Areapillin	NCOA2
Radix Bupleuri	MOL004609	Areapillin	NCOA1
Radix Bupleuri	MOL004609	Areapillin	CALM1
Radix Bupleuri	MOL013187	Cubebin	PTGS1
Radix Bupleuri	MOL013187	Cubebin	PTGS2
Radix Bupleuri	MOL013187	Cubebin	ADRB2
Radix Bupleuri	MOL013187	Cubebin	HSP90AA1
Radix Bupleuri	MOL004624	Longikaurin A	CHRM1
Radix Bupleuri	MOL004624	Longikaurin A	CHRM2
Radix Bupleuri	MOL004718	浼-spinasterol	NR3C2
Radix Bupleuri	MOL004718	浼-spinasterol	NCOA2
Radix Bupleuri	MOL000490	petunidin	PTGS1
Radix Bupleuri	MOL000490	petunidin	PTGS2
Radix Bupleuri	MOL000490	petunidin	ESR2
Radix Bupleuri	MOL000490	petunidin	MAPK14
Radix Bupleuri	MOL000490	petunidin	GSK3B
Radix Bupleuri	MOL000490	petunidin	HSP90AA1
Radix Bupleuri	MOL000490	petunidin	NCOA2
Radix Bupleuri	MOL000098	quercetin	PTGS1
Radix Bupleuri	MOL000098	quercetin	AR
Radix Bupleuri	MOL000098	quercetin	PPARG
Radix Bupleuri	MOL000098	quercetin	PTGS2
Radix Bupleuri	MOL000098	quercetin	HSP90AA1
Radix Bupleuri	MOL000098	quercetin	NCOA2
Radix Bupleuri	MOL000098	quercetin	AKR1B1
Radix Bupleuri	MOL000098	quercetin	PRSS1
Radix Bupleuri	MOL000098	quercetin	HTR
Radix Bupleuri	MOL000098	quercetin	KCNH2
Radix Bupleuri	MOL000098	quercetin	SCN5A
Radix Bupleuri	MOL000098	quercetin	ADRB2
Radix Bupleuri	MOL000098	quercetin	MMP3
Radix Bupleuri	MOL000098	quercetin	F7
Radix Bupleuri	MOL000098	quercetin	RXRA
Radix Bupleuri	MOL000098	quercetin	ACHE
Radix Bupleuri	MOL000098	quercetin	MAOB
Radix Bupleuri	MOL000098	quercetin	RELA
Radix Bupleuri	MOL000098	quercetin	EGFR
Radix Bupleuri	MOL000098	quercetin	AKT1
Radix Bupleuri	MOL000098	quercetin	VEGFA
Radix Bupleuri	MOL000098	quercetin	CCND1
Radix Bupleuri	MOL000098	quercetin	BCL2
Radix Bupleuri	MOL000098	quercetin	BCL2L1
Radix Bupleuri	MOL000098	quercetin	FOS
Radix Bupleuri	MOL000098	quercetin	CDKN1A
Radix Bupleuri	MOL000098	quercetin	EIF6
Radix Bupleuri	MOL000098	quercetin	BAX
Radix Bupleuri	MOL000098	quercetin	CASP9
Radix Bupleuri	MOL000098	quercetin	PLAU
Radix Bupleuri	MOL000098	quercetin	MMP9
Radix Bupleuri	MOL000098	quercetin	MAPK1
Radix Bupleuri	MOL000098	quercetin	IL10RB
Radix Bupleuri	MOL000098	quercetin	EGF
Radix Bupleuri	MOL000098	quercetin	RB1
Radix Bupleuri	MOL000098	quercetin	TNFSF15
Radix Bupleuri	MOL000098	quercetin	JUN
Radix Bupleuri	MOL000098	quercetin	IL6
Radix Bupleuri	MOL000098	quercetin	AHSA1
Radix Bupleuri	MOL000098	quercetin	CASP3
Radix Bupleuri	MOL000098	quercetin	TP63
Radix Bupleuri	MOL000098	quercetin	ELK1
Radix Bupleuri	MOL000098	quercetin	NFKBIA
Radix Bupleuri	MOL000098	quercetin	ODC1
Radix Bupleuri	MOL000098	quercetin	CASP8
Radix Bupleuri	MOL000098	quercetin	TOP1
Radix Bupleuri	MOL000098	quercetin	RAF1
Radix Bupleuri	MOL000098	quercetin	SOD1
Radix Bupleuri	MOL000098	quercetin	PRKCA
Radix Bupleuri	MOL000098	quercetin	MMP1
Radix Bupleuri	MOL000098	quercetin	HIF1A
Radix Bupleuri	MOL000098	quercetin	STAT1
Radix Bupleuri	MOL000098	quercetin	RUNX1T1
Radix Bupleuri	MOL000098	quercetin	CDK1
Radix Bupleuri	MOL000098	quercetin	HSPA5
Radix Bupleuri	MOL000098	quercetin	PPARG
Radix Bupleuri	MOL000098	quercetin	ACACA
Radix Bupleuri	MOL000098	quercetin	HMOX1
Radix Bupleuri	MOL000098	quercetin	CYP3A4
Radix Bupleuri	MOL000098	quercetin	CYP1A2
Radix Bupleuri	MOL000098	quercetin	CAV1
Radix Bupleuri	MOL000098	quercetin	MYC
Radix Bupleuri	MOL000098	quercetin	F3
Radix Bupleuri	MOL000098	quercetin	GJA1
Radix Bupleuri	MOL000098	quercetin	CYP1A1
Radix Bupleuri	MOL000098	quercetin	ICAM1
Radix Bupleuri	MOL000098	quercetin	IL1B
Radix Bupleuri	MOL000098	quercetin	CCL2
Radix Bupleuri	MOL000098	quercetin	SELE
Radix Bupleuri	MOL000098	quercetin	PTGER3
Radix Bupleuri	MOL000098	quercetin	IL8RA
Radix Bupleuri	MOL000098	quercetin	PRKCB
Radix Bupleuri	MOL000098	quercetin	BIRC5
Radix Bupleuri	MOL000098	quercetin	DUOX2
Radix Bupleuri	MOL000098	quercetin	HSPB1
Radix Bupleuri	MOL000098	quercetin	SULT1E1
Radix Bupleuri	MOL000098	quercetin	IL2
Radix Bupleuri	MOL000098	quercetin	NR1I2
Radix Bupleuri	MOL000098	quercetin	CYP1B1
Radix Bupleuri	MOL000098	quercetin	CCNB1
Radix Bupleuri	MOL000098	quercetin	THBD
Radix Bupleuri	MOL000098	quercetin	SERPINE1
Radix Bupleuri	MOL000098	quercetin	COL1A1
Radix Bupleuri	MOL000098	quercetin	IFNGR1
Radix Bupleuri	MOL000098	quercetin	ALOX5
Radix Bupleuri	MOL000098	quercetin	IL1A
Radix Bupleuri	MOL000098	quercetin	MPO
Radix Bupleuri	MOL000098	quercetin	TOP2A
Radix Bupleuri	MOL000098	quercetin	NCF1
Radix Bupleuri	MOL000098	quercetin	ABCG2
Radix Bupleuri	MOL000098	quercetin	HAS2
Radix Bupleuri	MOL000098	quercetin	GSTP1
Radix Bupleuri	MOL000098	quercetin	NFE2L2
Radix Bupleuri	MOL000098	quercetin	PARP1
Radix Bupleuri	MOL000098	quercetin	AHR
Radix Bupleuri	MOL000098	quercetin	PSMD3
Radix Bupleuri	MOL000098	quercetin	COL3A1
Radix Bupleuri	MOL000098	quercetin	CXCL11
Radix Bupleuri	MOL000098	quercetin	CXCL2
Radix Bupleuri	MOL000098	quercetin	DCAF5
Radix Bupleuri	MOL000098	quercetin	NR1I3
Radix Bupleuri	MOL000098	quercetin	CHEK2
Radix Bupleuri	MOL000098	quercetin	INSRR
Radix Bupleuri	MOL000098	quercetin	CLDN4
Radix Bupleuri	MOL000098	quercetin	PPARA
Radix Bupleuri	MOL000098	quercetin	HSF1
Radix Bupleuri	MOL000098	quercetin	CRP
Radix Bupleuri	MOL000098	quercetin	CXCL10
Radix Bupleuri	MOL000098	quercetin	CHUK
Radix Bupleuri	MOL000098	quercetin	SPP1
Radix Bupleuri	MOL000098	quercetin	RUNX2
Radix Bupleuri	MOL000098	quercetin	RASSF1
Radix Bupleuri	MOL000098	quercetin	E2F1
Radix Bupleuri	MOL000098	quercetin	E2F2
Radix Bupleuri	MOL000098	quercetin	ACPP
Radix Bupleuri	MOL000098	quercetin	CTSD
Radix Bupleuri	MOL000098	quercetin	IGFBP3
Radix Bupleuri	MOL000098	quercetin	IGF2
Radix Bupleuri	MOL000098	quercetin	CD40LG
Radix Bupleuri	MOL000098	quercetin	ERBB3
Radix Bupleuri	MOL000098	quercetin	PON1
Radix Bupleuri	MOL000098	quercetin	DIO1
Radix Bupleuri	MOL000098	quercetin	PCOLCE
Radix Bupleuri	MOL000098	quercetin	NPEPPS
Radix Bupleuri	MOL000098	quercetin	HK2
Radix Bupleuri	MOL000098	quercetin	RASA1
Radix Bupleuri	MOL000098	quercetin	GSTM1
Radix Bupleuri	MOL000098	quercetin	GSTM2
Saposhnikoviae Radix	MOL000011	(2R,3R)-3-(4-hydroxy-3-methoxy-phenyl)-5-methoxy-2-methylol-2,3-dihydropyrano[5,6-h][1,4]benzodioxin-9-one	NOS2
Saposhnikoviae Radix	MOL000011	(2R,3R)-3-(4-hydroxy-3-methoxy-phenyl)-5-methoxy-2-methylol-2,3-dihydropyrano[5,6-h][1,4]benzodioxin-9-one	HTR
Saposhnikoviae Radix	MOL000011	(2R,3R)-3-(4-hydroxy-3-methoxy-phenyl)-5-methoxy-2-methylol-2,3-dihydropyrano[5,6-h][1,4]benzodioxin-9-one	KCNH2
Saposhnikoviae Radix	MOL000011	(2R,3R)-3-(4-hydroxy-3-methoxy-phenyl)-5-methoxy-2-methylol-2,3-dihydropyrano[5,6-h][1,4]benzodioxin-9-one	ESR1
Saposhnikoviae Radix	MOL000011	(2R,3R)-3-(4-hydroxy-3-methoxy-phenyl)-5-methoxy-2-methylol-2,3-dihydropyrano[5,6-h][1,4]benzodioxin-9-one	AR
Saposhnikoviae Radix	MOL000011	(2R,3R)-3-(4-hydroxy-3-methoxy-phenyl)-5-methoxy-2-methylol-2,3-dihydropyrano[5,6-h][1,4]benzodioxin-9-one	SCN5A
Saposhnikoviae Radix	MOL000011	(2R,3R)-3-(4-hydroxy-3-methoxy-phenyl)-5-methoxy-2-methylol-2,3-dihydropyrano[5,6-h][1,4]benzodioxin-9-one	PTGS2
Saposhnikoviae Radix	MOL000011	(2R,3R)-3-(4-hydroxy-3-methoxy-phenyl)-5-methoxy-2-methylol-2,3-dihydropyrano[5,6-h][1,4]benzodioxin-9-one	F7
Saposhnikoviae Radix	MOL000011	(2R,3R)-3-(4-hydroxy-3-methoxy-phenyl)-5-methoxy-2-methylol-2,3-dihydropyrano[5,6-h][1,4]benzodioxin-9-one	KDR
Saposhnikoviae Radix	MOL000011	(2R,3R)-3-(4-hydroxy-3-methoxy-phenyl)-5-methoxy-2-methylol-2,3-dihydropyrano[5,6-h][1,4]benzodioxin-9-one	DPP4
Saposhnikoviae Radix	MOL000011	(2R,3R)-3-(4-hydroxy-3-methoxy-phenyl)-5-methoxy-2-methylol-2,3-dihydropyrano[5,6-h][1,4]benzodioxin-9-one	HSP90AA1
Saposhnikoviae Radix	MOL000011	(2R,3R)-3-(4-hydroxy-3-methoxy-phenyl)-5-methoxy-2-methylol-2,3-dihydropyrano[5,6-h][1,4]benzodioxin-9-one	PRSS1
Saposhnikoviae Radix	MOL000011	(2R,3R)-3-(4-hydroxy-3-methoxy-phenyl)-5-methoxy-2-methylol-2,3-dihydropyrano[5,6-h][1,4]benzodioxin-9-one	NCOA1
Saposhnikoviae Radix	MOL000011	(2R,3R)-3-(4-hydroxy-3-methoxy-phenyl)-5-methoxy-2-methylol-2,3-dihydropyrano[5,6-h][1,4]benzodioxin-9-one	CALM1
Saposhnikoviae Radix	MOL011730	11-hydroxy-sec-o-beta-d-glucosylhamaudol_qt	NOS2
Saposhnikoviae Radix	MOL011730	11-hydroxy-sec-o-beta-d-glucosylhamaudol_qt	PTGS1
Saposhnikoviae Radix	MOL011730	11-hydroxy-sec-o-beta-d-glucosylhamaudol_qt	PTGS2
Saposhnikoviae Radix	MOL011730	11-hydroxy-sec-o-beta-d-glucosylhamaudol_qt	DPP4
Saposhnikoviae Radix	MOL011730	11-hydroxy-sec-o-beta-d-glucosylhamaudol_qt	CDK2
Saposhnikoviae Radix	MOL011730	11-hydroxy-sec-o-beta-d-glucosylhamaudol_qt	CCNA2
Saposhnikoviae Radix	MOL011732	anomalin	PRSS1
Saposhnikoviae Radix	MOL011732	anomalin	CALM1
Saposhnikoviae Radix	MOL011737	divaricatacid	NOS2
Saposhnikoviae Radix	MOL011737	divaricatacid	HTR
Saposhnikoviae Radix	MOL011737	divaricatacid	AR
Saposhnikoviae Radix	MOL011737	divaricatacid	PTGS2
Saposhnikoviae Radix	MOL011737	divaricatacid	DPP4
Saposhnikoviae Radix	MOL011740	divaricatol	NOS2
Saposhnikoviae Radix	MOL011740	divaricatol	HTR
Saposhnikoviae Radix	MOL011740	divaricatol	AR
Saposhnikoviae Radix	MOL011740	divaricatol	SCN5A
Saposhnikoviae Radix	MOL011740	divaricatol	PPARG
Saposhnikoviae Radix	MOL011740	divaricatol	PTGS2
Saposhnikoviae Radix	MOL011740	divaricatol	ACHE
Saposhnikoviae Radix	MOL011740	divaricatol	ESR2
Saposhnikoviae Radix	MOL011740	divaricatol	DPP4
Saposhnikoviae Radix	MOL011740	divaricatol	GSK3B
Saposhnikoviae Radix	MOL011740	divaricatol	CDK2
Saposhnikoviae Radix	MOL011740	divaricatol	PRSS1
Saposhnikoviae Radix	MOL001941	Ammidin	HTR
Saposhnikoviae Radix	MOL001941	Ammidin	PTGS2
Saposhnikoviae Radix	MOL001941	Ammidin	GABRA1
Saposhnikoviae Radix	MOL001941	Ammidin	DPP4
Saposhnikoviae Radix	MOL001941	Ammidin	MAOB
Saposhnikoviae Radix	MOL011747	ledebouriellol	NOS2
Saposhnikoviae Radix	MOL011747	ledebouriellol	HTR
Saposhnikoviae Radix	MOL011747	ledebouriellol	ESR1
Saposhnikoviae Radix	MOL011747	ledebouriellol	AR
Saposhnikoviae Radix	MOL011747	ledebouriellol	PPARG
Saposhnikoviae Radix	MOL011747	ledebouriellol	ACHE
Saposhnikoviae Radix	MOL011747	ledebouriellol	ESR2
Saposhnikoviae Radix	MOL011747	ledebouriellol	DPP4
Saposhnikoviae Radix	MOL011747	ledebouriellol	CDK2
Saposhnikoviae Radix	MOL011747	ledebouriellol	PRSS1
Saposhnikoviae Radix	MOL011749	phelloptorin	HTR
Saposhnikoviae Radix	MOL011749	phelloptorin	RXRA
Saposhnikoviae Radix	MOL011749	phelloptorin	DPP4
Saposhnikoviae Radix	MOL011753	5-O-Methylvisamminol	NOS2
Saposhnikoviae Radix	MOL011753	5-O-Methylvisamminol	PTGS1
Saposhnikoviae Radix	MOL011753	5-O-Methylvisamminol	DRD1
Saposhnikoviae Radix	MOL011753	5-O-Methylvisamminol	HTR
Saposhnikoviae Radix	MOL011753	5-O-Methylvisamminol	CHRM1
Saposhnikoviae Radix	MOL011753	5-O-Methylvisamminol	ESR1
Saposhnikoviae Radix	MOL011753	5-O-Methylvisamminol	AR
Saposhnikoviae Radix	MOL011753	5-O-Methylvisamminol	SCN5A
Saposhnikoviae Radix	MOL013077	Decursin	ACHE
Saposhnikoviae Radix	MOL013077	Decursin	ADRB2
Saposhnikoviae Radix	MOL013077	Decursin	DPP4
Saposhnikoviae Radix	MOL013077	Decursin	HSP90AA1
Saposhnikoviae Radix	MOL013077	Decursin	CDK2
Saposhnikoviae Radix	MOL013077	Decursin	CALM1
Saposhnikoviae Radix	MOL013077	Decursin	CHRM3
Saposhnikoviae Radix	MOL013077	Decursin	HTR
Saposhnikoviae Radix	MOL013077	Decursin	CHRM1
Saposhnikoviae Radix	MOL013077	Decursin	ESR1
Saposhnikoviae Radix	MOL013077	Decursin	SCN5A
Saposhnikoviae Radix	MOL013077	Decursin	PTGS2
Saposhnikoviae Radix	MOL007514	methyl icosa-11,14-dienoate	NCOA2
Saposhnikoviae Radix	MOL011753	5-O-Methylvisamminol	RXRA
Saposhnikoviae Radix	MOL011753	5-O-Methylvisamminol	ACHE
Saposhnikoviae Radix	MOL011753	5-O-Methylvisamminol	ADRA1A
Saposhnikoviae Radix	MOL011753	5-O-Methylvisamminol	ADRA1B
Saposhnikoviae Radix	MOL011753	5-O-Methylvisamminol	ADRB2
Saposhnikoviae Radix	MOL011753	5-O-Methylvisamminol	OPRM1
Saposhnikoviae Radix	MOL011753	5-O-Methylvisamminol	ESR2
Saposhnikoviae Radix	MOL011753	5-O-Methylvisamminol	GABRA1
Saposhnikoviae Radix	MOL011753	5-O-Methylvisamminol	DPP4
Saposhnikoviae Radix	MOL011753	5-O-Methylvisamminol	GSK3B
Saposhnikoviae Radix	MOL011753	5-O-Methylvisamminol	CDK2
Saposhnikoviae Radix	MOL002644	Phellopterin	HTR
Saposhnikoviae Radix	MOL002644	Phellopterin	CHRM1
Saposhnikoviae Radix	MOL002644	Phellopterin	SCN5A
Saposhnikoviae Radix	MOL002644	Phellopterin	PTGS2
Saposhnikoviae Radix	MOL002644	Phellopterin	RXRA
Saposhnikoviae Radix	MOL002644	Phellopterin	ADRA1B
Saposhnikoviae Radix	MOL002644	Phellopterin	ADRB2
Saposhnikoviae Radix	MOL002644	Phellopterin	GABRA1
Saposhnikoviae Radix	MOL002644	Phellopterin	DPP4
Saposhnikoviae Radix	MOL002644	Phellopterin	HSP90AA1
Saposhnikoviae Radix	MOL000359	sitosterol	PGR
Saposhnikoviae Radix	MOL000359	sitosterol	NCOA2
Saposhnikoviae Radix	MOL000359	sitosterol	NR3C2
Saposhnikoviae Radix	MOL000173	wogonin	NOS2
Saposhnikoviae Radix	MOL000173	wogonin	PTGS1
Saposhnikoviae Radix	MOL000173	wogonin	ESR1
Saposhnikoviae Radix	MOL000173	wogonin	AR
Saposhnikoviae Radix	MOL000173	wogonin	SCN5A
Saposhnikoviae Radix	MOL000173	wogonin	PPARG
Saposhnikoviae Radix	MOL000173	wogonin	PTGS2
Saposhnikoviae Radix	MOL000173	wogonin	RXRA
Saposhnikoviae Radix	MOL000173	wogonin	DPP4
Saposhnikoviae Radix	MOL000173	wogonin	MAPK14
Saposhnikoviae Radix	MOL000173	wogonin	GSK3B
Saposhnikoviae Radix	MOL000173	wogonin	HSP90AA1
Saposhnikoviae Radix	MOL000173	wogonin	CDK2
Saposhnikoviae Radix	MOL000173	wogonin	CHEK1
Saposhnikoviae Radix	MOL000173	wogonin	PRSS1
Saposhnikoviae Radix	MOL000173	wogonin	CALM1
Saposhnikoviae Radix	MOL000173	wogonin	ADRB2
Saposhnikoviae Radix	MOL000173	wogonin	GABRA1
Saposhnikoviae Radix	MOL000173	wogonin	RELA
Saposhnikoviae Radix	MOL000173	wogonin	AKT1
Saposhnikoviae Radix	MOL000173	wogonin	CCND1
Saposhnikoviae Radix	MOL000173	wogonin	BCL2
Saposhnikoviae Radix	MOL000173	wogonin	CDKN1A
Saposhnikoviae Radix	MOL000173	wogonin	EIF6
Saposhnikoviae Radix	MOL000173	wogonin	BAX
Saposhnikoviae Radix	MOL000173	wogonin	CASP9
Saposhnikoviae Radix	MOL000173	wogonin	KDR
Saposhnikoviae Radix	MOL000173	wogonin	TNFSF15
Saposhnikoviae Radix	MOL000173	wogonin	JUN
Saposhnikoviae Radix	MOL000173	wogonin	IL6
Saposhnikoviae Radix	MOL000173	wogonin	AHSA1
Saposhnikoviae Radix	MOL000173	wogonin	CASP3
Saposhnikoviae Radix	MOL000173	wogonin	TP63
Saposhnikoviae Radix	MOL000173	wogonin	BBC3
Saposhnikoviae Radix	MOL000173	wogonin	TEP1
Saposhnikoviae Radix	MOL000173	wogonin	MMP1
Saposhnikoviae Radix	MOL000173	wogonin	CCL2
Saposhnikoviae Radix	MOL000173	wogonin	PRKCD
Saposhnikoviae Radix	MOL000173	wogonin	PTGER3
Saposhnikoviae Radix	MOL000173	wogonin	FSD1
Saposhnikoviae Radix	MOL000173	wogonin	IL8RA
Saposhnikoviae Radix	MOL000173	wogonin	MCL1
Saposhnikoviae Radix	MOL000358	beta-sitosterol	PGR
Saposhnikoviae Radix	MOL000358	beta-sitosterol	NCOA2
Saposhnikoviae Radix	MOL000358	beta-sitosterol	PTGS1
Saposhnikoviae Radix	MOL000358	beta-sitosterol	PTGS2
Saposhnikoviae Radix	MOL000358	beta-sitosterol	HSP90AA1
Saposhnikoviae Radix	MOL000358	beta-sitosterol	KCNH2
Saposhnikoviae Radix	MOL000358	beta-sitosterol	DRD1
Saposhnikoviae Radix	MOL000358	beta-sitosterol	CHRM3
Saposhnikoviae Radix	MOL000358	beta-sitosterol	CHRM1
Saposhnikoviae Radix	MOL000358	beta-sitosterol	SCN5A
Saposhnikoviae Radix	MOL000358	beta-sitosterol	CHRM4
Saposhnikoviae Radix	MOL000358	beta-sitosterol	ADRA1A
Saposhnikoviae Radix	MOL000358	beta-sitosterol	CHRM2
Saposhnikoviae Radix	MOL000358	beta-sitosterol	ADRA1B
Saposhnikoviae Radix	MOL000358	beta-sitosterol	ADRB2
Saposhnikoviae Radix	MOL000358	beta-sitosterol	CHRNA2
Saposhnikoviae Radix	MOL000358	beta-sitosterol	SLC6A4
Saposhnikoviae Radix	MOL000358	beta-sitosterol	OPRM1
Saposhnikoviae Radix	MOL000358	beta-sitosterol	GABRA1
Saposhnikoviae Radix	MOL000358	beta-sitosterol	BCL2
Saposhnikoviae Radix	MOL000358	beta-sitosterol	BAX
Saposhnikoviae Radix	MOL000358	beta-sitosterol	CASP9
Saposhnikoviae Radix	MOL000358	beta-sitosterol	JUN
Saposhnikoviae Radix	MOL000358	beta-sitosterol	CASP3
Saposhnikoviae Radix	MOL000358	beta-sitosterol	CASP8
Saposhnikoviae Radix	MOL000358	beta-sitosterol	PRKCA
Saposhnikoviae Radix	MOL000358	beta-sitosterol	PON1
Saposhnikoviae Radix	MOL000358	beta-sitosterol	MAP2
Saposhnikoviae Radix	MOL001494	Mandenol	PTGS1
Saposhnikoviae Radix	MOL001494	Mandenol	PTGS2
Saposhnikoviae Radix	MOL001494	Mandenol	NCOA2
Saposhnikoviae Radix	MOL001942	isoimperatorin	PTGS2
Saposhnikoviae Radix	MOL003588	Prangenidin	PTGS1
Saposhnikoviae Radix	MOL003588	Prangenidin	HTR
Saposhnikoviae Radix	MOL003588	Prangenidin	ESR1
Saposhnikoviae Radix	MOL003588	Prangenidin	AR
Saposhnikoviae Radix	MOL003588	Prangenidin	RXRA
Saposhnikoviae Radix	MOL003588	Prangenidin	GABRA1
Saposhnikoviae Radix	MOL003588	Prangenidin	DPP4
Saposhnikoviae Radix	MOL003588	Prangenidin	HSP90AA1
Saposhnikoviae Radix	MOL003588	Prangenidin	CDK2
Saposhnikoviae Radix	MOL003588	Prangenidin	CHEK1
Saposhnikoviae Radix	MOL003588	Prangenidin	CCNA2
Cortex Moutan	MOL000211	Mairin	PGR
Cortex Moutan	MOL000359	sitosterol	PGR
Cortex Moutan	MOL000359	sitosterol	NCOA2
Cortex Moutan	MOL000359	sitosterol	NR3C2
Cortex Moutan	MOL000422	kaempferol	NOS2
Cortex Moutan	MOL000422	kaempferol	PTGS1
Cortex Moutan	MOL000422	kaempferol	AR
Cortex Moutan	MOL000422	kaempferol	PPARG
Cortex Moutan	MOL000422	kaempferol	PTGS2
Cortex Moutan	MOL000422	kaempferol	HSP90AA1
Cortex Moutan	MOL000422	kaempferol	NCOA2
Cortex Moutan	MOL000422	kaempferol	PRSS1
Cortex Moutan	MOL000422	kaempferol	PGR
Cortex Moutan	MOL000422	kaempferol	HTR
Cortex Moutan	MOL000422	kaempferol	CHRM1
Cortex Moutan	MOL000422	kaempferol	ACHE
Cortex Moutan	MOL000422	kaempferol	SLC6A2
Cortex Moutan	MOL000422	kaempferol	CHRM2
Cortex Moutan	MOL000422	kaempferol	ADRA1B
Cortex Moutan	MOL000422	kaempferol	GABRA1
Cortex Moutan	MOL000422	kaempferol	F7
Cortex Moutan	MOL000422	kaempferol	CALM1
Cortex Moutan	MOL000422	kaempferol	IKBKB
Cortex Moutan	MOL000422	kaempferol	AKT1
Cortex Moutan	MOL000422	kaempferol	BCL2
Cortex Moutan	MOL000422	kaempferol	BAX
Cortex Moutan	MOL000422	kaempferol	TNFSF15
Cortex Moutan	MOL000422	kaempferol	JUN
Cortex Moutan	MOL000422	kaempferol	AHSA1
Cortex Moutan	MOL000422	kaempferol	CASP3
Cortex Moutan	MOL000422	kaempferol	MAPK8
Cortex Moutan	MOL000422	kaempferol	MMP1
Cortex Moutan	MOL000422	kaempferol	STAT1
Cortex Moutan	MOL000422	kaempferol	CDK1
Cortex Moutan	MOL000422	kaempferol	PPARG
Cortex Moutan	MOL000422	kaempferol	CYP3A4
Cortex Moutan	MOL000422	kaempferol	CYP1A2
Cortex Moutan	MOL000422	kaempferol	CYP1A1
Cortex Moutan	MOL000422	kaempferol	ICAM1
Cortex Moutan	MOL000422	kaempferol	SELE
Cortex Moutan	MOL000422	kaempferol	VCAM1
Cortex Moutan	MOL000422	kaempferol	NR1I2
Cortex Moutan	MOL000422	kaempferol	CYP1B1
Cortex Moutan	MOL000422	kaempferol	ALOX5
Cortex Moutan	MOL000422	kaempferol	HAS2
Cortex Moutan	MOL000422	kaempferol	GSTP1
Cortex Moutan	MOL000422	kaempferol	AHR
Cortex Moutan	MOL000422	kaempferol	PSMD3
Cortex Moutan	MOL000422	kaempferol	SLC2A4
Cortex Moutan	MOL000422	kaempferol	INSRR
Cortex Moutan	MOL000422	kaempferol	DIO1
Cortex Moutan	MOL000422	kaempferol	PPP3CA
Cortex Moutan	MOL000422	kaempferol	GSTM1
Cortex Moutan	MOL000422	kaempferol	GSTM2
Cortex Moutan	MOL000422	kaempferol	AKR1C3
Cortex Moutan	MOL000422	kaempferol	SLPI
Cortex Moutan	MOL000492	(+)-catechin	PTGS1
Cortex Moutan	MOL000492	(+)-catechin	ESR1
Cortex Moutan	MOL000492	(+)-catechin	PTGS2
Cortex Moutan	MOL000492	(+)-catechin	HSP90AA1
Cortex Moutan	MOL000492	(+)-catechin	CALM1
Cortex Moutan	MOL000492	(+)-catechin	RXRA
Cortex Moutan	MOL000492	(+)-catechin	CAT
Cortex Moutan	MOL000492	(+)-catechin	HAS2
Cortex Moutan	MOL007374	5-[[5-(4-methoxyphenyl)-2-furyl]methylene]barbituric acid	ESR1
Cortex Moutan	MOL007374	5-[[5-(4-methoxyphenyl)-2-furyl]methylene]barbituric acid	GSK3B
Cortex Moutan	MOL007374	5-[[5-(4-methoxyphenyl)-2-furyl]methylene]barbituric acid	HSP90AA1
Cortex Moutan	MOL007374	5-[[5-(4-methoxyphenyl)-2-furyl]methylene]barbituric acid	CDK2
Cortex Moutan	MOL000098	quercetin	PTGS1
Cortex Moutan	MOL000098	quercetin	AR
Cortex Moutan	MOL000098	quercetin	PPARG
Cortex Moutan	MOL000098	quercetin	PTGS2
Cortex Moutan	MOL000098	quercetin	NCOA2
Cortex Moutan	MOL000098	quercetin	DPP4
Cortex Moutan	MOL000098	quercetin	AKR1B1
Cortex Moutan	MOL000098	quercetin	PRSS1
Cortex Moutan	MOL000098	quercetin	HTR
Cortex Moutan	MOL000098	quercetin	KCNH2
Cortex Moutan	MOL000098	quercetin	SCN5A
Cortex Moutan	MOL000098	quercetin	ADRB2
Cortex Moutan	MOL000098	quercetin	MMP3
Cortex Moutan	MOL000098	quercetin	F7
Cortex Moutan	MOL000098	quercetin	RXRA
Cortex Moutan	MOL000098	quercetin	ACHE
Cortex Moutan	MOL000098	quercetin	GABRA1
Cortex Moutan	MOL000098	quercetin	MAOB
Cortex Moutan	MOL000098	quercetin	RELA
Cortex Moutan	MOL000098	quercetin	EGFR
Cortex Moutan	MOL000098	quercetin	AKT1
Cortex Moutan	MOL000098	quercetin	VEGFA
Cortex Moutan	MOL000098	quercetin	CCND1
Cortex Moutan	MOL000098	quercetin	BCL2
Cortex Moutan	MOL000098	quercetin	BCL2L1
Cortex Moutan	MOL000098	quercetin	FOS
Cortex Moutan	MOL000098	quercetin	CDKN1A
Cortex Moutan	MOL000098	quercetin	EIF6
Cortex Moutan	MOL000098	quercetin	CASP9
Cortex Moutan	MOL000098	quercetin	PLAU
Cortex Moutan	MOL000098	quercetin	MMP2
Cortex Moutan	MOL000098	quercetin	MMP9
Cortex Moutan	MOL000098	quercetin	MAPK1
Cortex Moutan	MOL000098	quercetin	IL10RB
Cortex Moutan	MOL000098	quercetin	EGF
Cortex Moutan	MOL000098	quercetin	RB1
Cortex Moutan	MOL000098	quercetin	TNFSF15
Cortex Moutan	MOL000098	quercetin	JUN
Cortex Moutan	MOL000098	quercetin	IL6
Cortex Moutan	MOL000098	quercetin	AHSA1
Cortex Moutan	MOL000098	quercetin	CASP3
Cortex Moutan	MOL000098	quercetin	ELK1
Cortex Moutan	MOL000098	quercetin	NFKBIA
Cortex Moutan	MOL000098	quercetin	POR
Cortex Moutan	MOL000098	quercetin	ODC1
Cortex Moutan	MOL000098	quercetin	CASP8
Cortex Moutan	MOL000098	quercetin	TOP1
Cortex Moutan	MOL000098	quercetin	RAF1
Cortex Moutan	MOL000098	quercetin	SOD1
Cortex Moutan	MOL000098	quercetin	PRKCA
Cortex Moutan	MOL000098	quercetin	MMP1
Cortex Moutan	MOL000098	quercetin	HIF1A
Cortex Moutan	MOL000098	quercetin	STAT1
Cortex Moutan	MOL000098	quercetin	RUNX1T1
Cortex Moutan	MOL000098	quercetin	CDK1
Cortex Moutan	MOL000098	quercetin	HSPA5
Cortex Moutan	MOL000098	quercetin	ERBB2
Cortex Moutan	MOL000098	quercetin	PPARG
Cortex Moutan	MOL000098	quercetin	ACACA
Cortex Moutan	MOL000098	quercetin	HMOX1
Cortex Moutan	MOL000098	quercetin	CYP3A4
Cortex Moutan	MOL000098	quercetin	CYP1A2
Cortex Moutan	MOL000098	quercetin	CAV1
Cortex Moutan	MOL000098	quercetin	MYC
Cortex Moutan	MOL000098	quercetin	F3
Cortex Moutan	MOL000098	quercetin	GJA1
Cortex Moutan	MOL000098	quercetin	CYP1A1
Cortex Moutan	MOL000098	quercetin	ICAM1
Cortex Moutan	MOL000098	quercetin	CCL2
Cortex Moutan	MOL000098	quercetin	SELE
Cortex Moutan	MOL000098	quercetin	VCAM1
Cortex Moutan	MOL000098	quercetin	PTGER3
Cortex Moutan	MOL000098	quercetin	IL8RA
Cortex Moutan	MOL000098	quercetin	PRKCB
Cortex Moutan	MOL000098	quercetin	BIRC5
Cortex Moutan	MOL000098	quercetin	DUOX2
Cortex Moutan	MOL000098	quercetin	NOS3
Cortex Moutan	MOL000098	quercetin	HSPB1
Cortex Moutan	MOL000098	quercetin	SULT1E1
Cortex Moutan	MOL000098	quercetin	MGAM
Cortex Moutan	MOL000098	quercetin	IL2
Cortex Moutan	MOL000098	quercetin	CYP1B1
Cortex Moutan	MOL000098	quercetin	CCNB1
Cortex Moutan	MOL000098	quercetin	PLAT
Cortex Moutan	MOL000098	quercetin	THBD
Cortex Moutan	MOL000098	quercetin	SERPINE1
Cortex Moutan	MOL000098	quercetin	COL1A1
Cortex Moutan	MOL000098	quercetin	IFNGR1
Cortex Moutan	MOL000098	quercetin	ALOX5
Cortex Moutan	MOL000098	quercetin	IL1A
Cortex Moutan	MOL000098	quercetin	MPO
Cortex Moutan	MOL000098	quercetin	TOP2A
Cortex Moutan	MOL000098	quercetin	NCF1
Cortex Moutan	MOL000098	quercetin	ABCG2
Cortex Moutan	MOL000098	quercetin	GSTP1
Cortex Moutan	MOL000098	quercetin	NFE2L2
Cortex Moutan	MOL000098	quercetin	NQO1
Cortex Moutan	MOL000098	quercetin	PARP1
Cortex Moutan	MOL000098	quercetin	AHR
Cortex Moutan	MOL000098	quercetin	PSMD3
Cortex Moutan	MOL000098	quercetin	SLC2A4
Cortex Moutan	MOL000098	quercetin	COL3A1
Cortex Moutan	MOL000098	quercetin	CXCL11
Cortex Moutan	MOL000098	quercetin	CXCL2
Cortex Moutan	MOL000098	quercetin	DCAF5
Cortex Moutan	MOL000098	quercetin	NR1I3
Cortex Moutan	MOL000098	quercetin	CHEK2
Cortex Moutan	MOL000098	quercetin	CLDN4
Cortex Moutan	MOL000098	quercetin	PPARA
Cortex Moutan	MOL000098	quercetin	PPARD
Cortex Moutan	MOL000098	quercetin	HSF1
Cortex Moutan	MOL000098	quercetin	CRP
Cortex Moutan	MOL000098	quercetin	CXCL10
Cortex Moutan	MOL000098	quercetin	CHUK
Cortex Moutan	MOL000098	quercetin	SPP1
Cortex Moutan	MOL000098	quercetin	RUNX2
Cortex Moutan	MOL000098	quercetin	RASSF1
Cortex Moutan	MOL000098	quercetin	E2F1
Cortex Moutan	MOL000098	quercetin	E2F2
Cortex Moutan	MOL000098	quercetin	ACPP
Cortex Moutan	MOL000098	quercetin	CTSD
Cortex Moutan	MOL000098	quercetin	IGF2
Cortex Moutan	MOL000098	quercetin	CD40LG
Cortex Moutan	MOL000098	quercetin	IRF1
Cortex Moutan	MOL000098	quercetin	ERBB3
Cortex Moutan	MOL000098	quercetin	PON1
Cortex Moutan	MOL000098	quercetin	DIO1
Cortex Moutan	MOL000098	quercetin	PCOLCE
Cortex Moutan	MOL000098	quercetin	NPEPPS
Cortex Moutan	MOL000098	quercetin	HK2
Cortex Moutan	MOL000098	quercetin	RASA1
Cortex Moutan	MOL000098	quercetin	GSTM1
Cortex Moutan	MOL000098	quercetin	GSTM2
Licorice	MOL001484	Inermine	PTGS1
Licorice	MOL001484	Inermine	CHRM3
Licorice	MOL001484	Inermine	SCN5A
Licorice	MOL001484	Inermine	PTGS2
Licorice	MOL001484	Inermine	HTR3A
Licorice	MOL001484	Inermine	RXRA
Licorice	MOL001484	Inermine	ADRA1B
Licorice	MOL001484	Inermine	ADRA1D
Licorice	MOL001484	Inermine	IGHG1
Licorice	MOL001484	Inermine	PRSS1
Licorice	MOL001484	Inermine	CALM1
Licorice	MOL001484	Inermine	CHRM1
Licorice	MOL001484	Inermine	ADRB2
Licorice	MOL001484	Inermine	OPRM1
Licorice	MOL001484	Inermine	HSP90AA1
Licorice	MOL001484	Inermine	IGHG1
Licorice	MOL001484	Inermine	PRSS1
Licorice	MOL001484	Inermine	CALM1
Licorice	MOL001484	Inermine	CHRM1
Licorice	MOL001484	Inermine	ADRB2
Licorice	MOL001484	Inermine	OPRM1
Licorice	MOL001484	Inermine	HSP90AA1
Licorice	MOL001484	Inermine	IGHG1
Licorice	MOL001484	Inermine	PRSS1
Licorice	MOL001484	Inermine	CALM1
Licorice	MOL001484	Inermine	CHRM1
Licorice	MOL001484	Inermine	ADRB2
Licorice	MOL001484	Inermine	OPRM1
Licorice	MOL001484	Inermine	HSP90AA1
Licorice	MOL001484	Inermine	IGHG1
Licorice	MOL001484	Inermine	PRSS1
Licorice	MOL001484	Inermine	CALM1
Licorice	MOL001484	Inermine	CHRM1
Licorice	MOL001484	Inermine	ADRB2
Licorice	MOL001484	Inermine	OPRM1
Licorice	MOL001484	Inermine	HSP90AA1
Licorice	MOL001484	Inermine	IGHG1
Licorice	MOL001484	Inermine	PRSS1
Licorice	MOL001484	Inermine	CALM1
Licorice	MOL001484	Inermine	CHRM1
Licorice	MOL001484	Inermine	ADRB2
Licorice	MOL001484	Inermine	OPRM1
Licorice	MOL001484	Inermine	HSP90AA1
Licorice	MOL001484	Inermine	IGHG1
Licorice	MOL001484	Inermine	PRSS1
Licorice	MOL001484	Inermine	CALM1
Licorice	MOL001484	Inermine	CHRM1
Licorice	MOL001484	Inermine	ADRB2
Licorice	MOL001484	Inermine	OPRM1
Licorice	MOL001484	Inermine	HSP90AA1
Licorice	MOL001484	Inermine	IGHG1
Licorice	MOL001484	Inermine	PRSS1
Licorice	MOL001484	Inermine	CALM1
Licorice	MOL001484	Inermine	CHRM1
Licorice	MOL001484	Inermine	ADRB2
Licorice	MOL001484	Inermine	OPRM1
Licorice	MOL001484	Inermine	HSP90AA1
Licorice	MOL000239	Jaranol	PTGS1
Licorice	MOL000239	Jaranol	AR
Licorice	MOL000239	Jaranol	SCN5A
Licorice	MOL000239	Jaranol	PTGS2
Licorice	MOL000239	Jaranol	ESR2
Licorice	MOL000239	Jaranol	DPP4
Licorice	MOL000239	Jaranol	HSP90AA1
Licorice	MOL000239	Jaranol	CDK2
Licorice	MOL000239	Jaranol	CHEK1
Licorice	MOL000239	Jaranol	PRSS1
Licorice	MOL000239	Jaranol	NCOA2
Licorice	MOL000239	Jaranol	CALM1
Licorice	MOL002565	Medicarpin	NOS2
Licorice	MOL002565	Medicarpin	PTGS1
Licorice	MOL002565	Medicarpin	DRD1
Licorice	MOL002565	Medicarpin	CHRM3
Licorice	MOL002565	Medicarpin	CHRM1
Licorice	MOL002565	Medicarpin	ESR1
Licorice	MOL002565	Medicarpin	SCN5A
Licorice	MOL002565	Medicarpin	CHRM5
Licorice	MOL002565	Medicarpin	PTGS2
Licorice	MOL002565	Medicarpin	CHRM4
Licorice	MOL002565	Medicarpin	RXRA
Licorice	MOL002565	Medicarpin	ADRA1A
Licorice	MOL002565	Medicarpin	CHRM2
Licorice	MOL002565	Medicarpin	ADRA1B
Licorice	MOL002565	Medicarpin	NOS2
Licorice	MOL002565	Medicarpin	PTGS1
Licorice	MOL002565	Medicarpin	DRD1
Licorice	MOL002565	Medicarpin	CHRM3
Licorice	MOL002565	Medicarpin	CHRM1
Licorice	MOL002565	Medicarpin	ESR1
Licorice	MOL002565	Medicarpin	SCN5A
Licorice	MOL002565	Medicarpin	CHRM5
Licorice	MOL002565	Medicarpin	PTGS2
Licorice	MOL002565	Medicarpin	CHRM4
Licorice	MOL002565	Medicarpin	RXRA
Licorice	MOL002565	Medicarpin	ADRA1A
Licorice	MOL002565	Medicarpin	CHRM2
Licorice	MOL002565	Medicarpin	ADRA1B
Licorice	MOL002565	Medicarpin	NOS2
Licorice	MOL002565	Medicarpin	PTGS1
Licorice	MOL002565	Medicarpin	DRD1
Licorice	MOL002565	Medicarpin	CHRM3
Licorice	MOL002565	Medicarpin	CHRM1
Licorice	MOL002565	Medicarpin	ESR1
Licorice	MOL002565	Medicarpin	SCN5A
Licorice	MOL002565	Medicarpin	CHRM5
Licorice	MOL002565	Medicarpin	PTGS2
Licorice	MOL002565	Medicarpin	CHRM4
Licorice	MOL002565	Medicarpin	RXRA
Licorice	MOL002565	Medicarpin	ADRA1A
Licorice	MOL002565	Medicarpin	CHRM2
Licorice	MOL002565	Medicarpin	ADRA1B
Licorice	MOL002565	Medicarpin	NOS2
Licorice	MOL002565	Medicarpin	PTGS1
Licorice	MOL002565	Medicarpin	DRD1
Licorice	MOL002565	Medicarpin	CHRM3
Licorice	MOL002565	Medicarpin	CHRM1
Licorice	MOL002565	Medicarpin	ESR1
Licorice	MOL002565	Medicarpin	SCN5A
Licorice	MOL002565	Medicarpin	CHRM5
Licorice	MOL002565	Medicarpin	PTGS2
Licorice	MOL002565	Medicarpin	CHRM4
Licorice	MOL002565	Medicarpin	RXRA
Licorice	MOL002565	Medicarpin	ADRA1A
Licorice	MOL002565	Medicarpin	CHRM2
Licorice	MOL002565	Medicarpin	ADRA1B
Licorice	MOL000354	isorhamnetin	NOS2
Licorice	MOL000354	isorhamnetin	PTGS1
Licorice	MOL000354	isorhamnetin	ESR1
Licorice	MOL000354	isorhamnetin	AR
Licorice	MOL000354	isorhamnetin	PPARG
Licorice	MOL000354	isorhamnetin	PTGS2
Licorice	MOL000354	isorhamnetin	ESR2
Licorice	MOL000354	isorhamnetin	DPP4
Licorice	MOL000354	isorhamnetin	MAPK14
Licorice	MOL000354	isorhamnetin	GSK3B
Licorice	MOL000354	isorhamnetin	HSP90AA1
Licorice	MOL000354	isorhamnetin	CDK2
Licorice	MOL000354	isorhamnetin	PRSS1
Licorice	MOL000354	isorhamnetin	CCNA2
Licorice	MOL000354	isorhamnetin	NCOA2
Licorice	MOL000354	isorhamnetin	CALM1
Licorice	MOL000354	isorhamnetin	PYGM
Licorice	MOL000354	isorhamnetin	PPARD
Licorice	MOL000354	isorhamnetin	CHEK1
Licorice	MOL000354	isorhamnetin	AKR1B1
Licorice	MOL000354	isorhamnetin	NCOA1
Licorice	MOL000354	isorhamnetin	F7
Licorice	MOL000354	isorhamnetin	HTR
Licorice	MOL000354	isorhamnetin	ACHE
Licorice	MOL000354	isorhamnetin	GABRA1
Licorice	MOL000354	isorhamnetin	MAOB
Licorice	MOL000354	isorhamnetin	GRIA2
Licorice	MOL000354	isorhamnetin	RELA
Licorice	MOL000354	isorhamnetin	NCF1
Licorice	MOL000354	isorhamnetin	OLR1
Licorice	MOL000359	sitosterol	PGR
Licorice	MOL000359	sitosterol	NCOA2
Licorice	MOL000359	sitosterol	NR3C2
Licorice	MOL003656	Lupiwighteone	NOS2
Licorice	MOL003656	Lupiwighteone	HTR
Licorice	MOL003656	Lupiwighteone	ESR1
Licorice	MOL003656	Lupiwighteone	AR
Licorice	MOL003656	Lupiwighteone	SCN5A
Licorice	MOL003656	Lupiwighteone	PPARG
Licorice	MOL003656	Lupiwighteone	PTGS2
Licorice	MOL003656	Lupiwighteone	ESR2
Licorice	MOL003656	Lupiwighteone	DPP4
Licorice	MOL003656	Lupiwighteone	MAPK14
Licorice	MOL003656	Lupiwighteone	GSK3B
Licorice	MOL003656	Lupiwighteone	HSP90AA1
Licorice	MOL003656	Lupiwighteone	CDK2
Licorice	MOL003656	Lupiwighteone	CHEK1
Licorice	MOL003656	Lupiwighteone	PRSS1
Licorice	MOL003656	Lupiwighteone	CCNA2
Licorice	MOL003656	Lupiwighteone	NCOA2
Licorice	MOL003656	Lupiwighteone	CALM1
Licorice	MOL003896	7-Methoxy-2-methyl isoflavone	NOS2
Licorice	MOL003896	7-Methoxy-2-methyl isoflavone	PTGS1
Licorice	MOL003896	7-Methoxy-2-methyl isoflavone	DRD1
Licorice	MOL003896	7-Methoxy-2-methyl isoflavone	ADRA1D
Licorice	MOL003896	7-Methoxy-2-methyl isoflavone	SLC6A4
Licorice	MOL003896	7-Methoxy-2-methyl isoflavone	ESR2
Licorice	MOL003896	7-Methoxy-2-methyl isoflavone	GABRA1
Licorice	MOL003896	7-Methoxy-2-methyl isoflavone	DPP4
Licorice	MOL003896	7-Methoxy-2-methyl isoflavone	MAPK14
Licorice	MOL003896	7-Methoxy-2-methyl isoflavone	GSK3B
Licorice	MOL003896	7-Methoxy-2-methyl isoflavone	HSP90AA1
Licorice	MOL003896	7-Methoxy-2-methyl isoflavone	CDK2
Licorice	MOL003896	7-Methoxy-2-methyl isoflavone	LTA4H
Licorice	MOL003896	7-Methoxy-2-methyl isoflavone	MAOB
Licorice	MOL003896	7-Methoxy-2-methyl isoflavone	CHEK1
Licorice	MOL003896	7-Methoxy-2-methyl isoflavone	IGHG1
[truncated: 1,522 more rows]

## Sheet: Table S5
Table S5: 1033 uveitis-related genes were identified
Gene Symbol	Description	Category	Gifts	GC Id	Relevance score	GeneCards Link
IL10	Interleukin 10	Protein Coding	47	GC01M206767	86.12	https://www.genecards.org/cgi-bin/carddisp.pl?gene=IL10
IL6	Interleukin 6	Protein Coding	50	GC07P022765	80.68	https://www.genecards.org/cgi-bin/carddisp.pl?gene=IL6
IFNG	Interferon Gamma	Protein Coding	48	GC12M068064	75.66	https://www.genecards.org/cgi-bin/carddisp.pl?gene=IFNG
CD40LG	CD40 Ligand	Protein Coding	47	GC0XP136649	68.5	https://www.genecards.org/cgi-bin/carddisp.pl?gene=CD40LG
HLA-DRB1	Major Histocompatibility Complex, Class II, DR Beta 1	Protein Coding	46	GC06M032578	67.95	https://www.genecards.org/cgi-bin/carddisp.pl?gene=HLA-DRB1
IL2RA	Interleukin 2 Receptor Subunit Alpha	Protein Coding	50	GC10M006010	67.46	https://www.genecards.org/cgi-bin/carddisp.pl?gene=IL2RA
HLA-B	Major Histocompatibility Complex, Class I, B	Protein Coding	45	GC06M031315	62.84	https://www.genecards.org/cgi-bin/carddisp.pl?gene=HLA-B
NOD2	Nucleotide Binding Oligomerization Domain Containing 2	Protein Coding	48	GC16P050693	62.4	https://www.genecards.org/cgi-bin/carddisp.pl?gene=NOD2
TLR2	Toll Like Receptor 2	Protein Coding	51	GC04P153684	59.86	https://www.genecards.org/cgi-bin/carddisp.pl?gene=TLR2
TLR4	Toll Like Receptor 4	Protein Coding	51	GC09P117704	59.09	https://www.genecards.org/cgi-bin/carddisp.pl?gene=TLR4
HLA-A	Major Histocompatibility Complex, Class I, A	Protein Coding	46	GC06P047265	55.67	https://www.genecards.org/cgi-bin/carddisp.pl?gene=HLA-A
CTLA4	Cytotoxic T-Lymphocyte Associated Protein 4	Protein Coding	45	GC02P203867	55.49	https://www.genecards.org/cgi-bin/carddisp.pl?gene=CTLA4
TNF	Tumor Necrosis Factor	Protein Coding	51	GC06P047305	55.42	https://www.genecards.org/cgi-bin/carddisp.pl?gene=TNF
FOXP3	Forkhead Box P3	Protein Coding	46	GC0XM049250	49.76	https://www.genecards.org/cgi-bin/carddisp.pl?gene=FOXP3
CCL2	C-C Motif Chemokine Ligand 2	Protein Coding	48	GC17P034255	48.99	https://www.genecards.org/cgi-bin/carddisp.pl?gene=CCL2
FAS	Fas Cell Surface Death Receptor	Protein Coding	50	GC10P088969	48.19	https://www.genecards.org/cgi-bin/carddisp.pl?gene=FAS
TNFRSF1A	TNF Receptor Superfamily Member 1A	Protein Coding	49	GC12M006328	47.03	https://www.genecards.org/cgi-bin/carddisp.pl?gene=TNFRSF1A
RAG1	Recombination Activating 1	Protein Coding	45	GC11P036514	46.33	https://www.genecards.org/cgi-bin/carddisp.pl?gene=RAG1
HLA-DQB1	Major Histocompatibility Complex, Class II, DQ Beta 1	Protein Coding	44	GC06M032804	45.45	https://www.genecards.org/cgi-bin/carddisp.pl?gene=HLA-DQB1
CCR5	C-C Motif Chemokine Receptor 5	Protein Coding	46	GC03P046383	44.64	https://www.genecards.org/cgi-bin/carddisp.pl?gene=CCR5
IL2RB	Interleukin 2 Receptor Subunit Beta	Protein Coding	48	GC22M037125	44.31	https://www.genecards.org/cgi-bin/carddisp.pl?gene=IL2RB
IL2	Interleukin 2	Protein Coding	45	GC04M122451	43.94	https://www.genecards.org/cgi-bin/carddisp.pl?gene=IL2
FASLG	Fas Ligand	Protein Coding	47	GC01P172628	43.67	https://www.genecards.org/cgi-bin/carddisp.pl?gene=FASLG
CD40	CD40 Molecule	Protein Coding	48	GC20P046118	43.2	https://www.genecards.org/cgi-bin/carddisp.pl?gene=CD40
NLRP3	NLR Family Pyrin Domain Containing 3	Protein Coding	47	GC01P247415	42.69	https://www.genecards.org/cgi-bin/carddisp.pl?gene=NLRP3
TLR3	Toll Like Receptor 3	Protein Coding	52	GC04P186059	41.32	https://www.genecards.org/cgi-bin/carddisp.pl?gene=TLR3
PTPN22	Protein Tyrosine Phosphatase Non-Receptor Type 22	Protein Coding	46	GC01M113813	41.12	https://www.genecards.org/cgi-bin/carddisp.pl?gene=PTPN22
ADA	Adenosine Deaminase	Protein Coding	51	GC20M044620	40.26	https://www.genecards.org/cgi-bin/carddisp.pl?gene=ADA
TNFAIP3	TNF Alpha Induced Protein 3	Protein Coding	48	GC06P137866	40.07	https://www.genecards.org/cgi-bin/carddisp.pl?gene=TNFAIP3
CD79A	CD79a Molecule	Protein Coding	46	GC19P041877	39.43	https://www.genecards.org/cgi-bin/carddisp.pl?gene=CD79A
IL4	Interleukin 4	Protein Coding	46	GC05P132673	39.34	https://www.genecards.org/cgi-bin/carddisp.pl?gene=IL4
STAT1	Signal Transducer And Activator Of Transcription 1	Protein Coding	53	GC02M190908	38.95	https://www.genecards.org/cgi-bin/carddisp.pl?gene=STAT1
MPO	Myeloperoxidase	Protein Coding	50	GC17M058269	38.19	https://www.genecards.org/cgi-bin/carddisp.pl?gene=MPO
CCL3	C-C Motif Chemokine Ligand 3	Protein Coding	39	GC17M036088	38.01	https://www.genecards.org/cgi-bin/carddisp.pl?gene=CCL3
IL1B	Interleukin 1 Beta	Protein Coding	48	GC02M112829	37.93	https://www.genecards.org/cgi-bin/carddisp.pl?gene=IL1B
PTPRC	Protein Tyrosine Phosphatase Receptor Type C	Protein Coding	51	GC01P198607	37.71	https://www.genecards.org/cgi-bin/carddisp.pl?gene=PTPRC
STAT4	Signal Transducer And Activator Of Transcription 4	Protein Coding	45	GC02M191029	37.17	https://www.genecards.org/cgi-bin/carddisp.pl?gene=STAT4
IL23R	Interleukin 23 Receptor	Protein Coding	44	GC01P067138	37.16	https://www.genecards.org/cgi-bin/carddisp.pl?gene=IL23R
NLRP1	NLR Family Pyrin Domain Containing 1	Protein Coding	44	GC17M005499	36.92	https://www.genecards.org/cgi-bin/carddisp.pl?gene=NLRP1
STAT3	Signal Transducer And Activator Of Transcription 3	Protein Coding	52	GC17M042313	36.59	https://www.genecards.org/cgi-bin/carddisp.pl?gene=STAT3
CD27	CD27 Molecule	Protein Coding	45	GC12P008144	36.47	https://www.genecards.org/cgi-bin/carddisp.pl?gene=CD27
CD19	CD19 Molecule	Protein Coding	49	GC16P029083	36.46	https://www.genecards.org/cgi-bin/carddisp.pl?gene=CD19
MEFV	MEFV Innate Immuity Regulator, Pyrin	Protein Coding	43	GC16M003281	36.25	https://www.genecards.org/cgi-bin/carddisp.pl?gene=MEFV
MBL2	Mannose Binding Lectin 2	Protein Coding	47	GC10M052760	36.19	https://www.genecards.org/cgi-bin/carddisp.pl?gene=MBL2
IL7R	Interleukin 7 Receptor	Protein Coding	47	GC05P035852	36	https://www.genecards.org/cgi-bin/carddisp.pl?gene=IL7R
IL17A	Interleukin 17A	Protein Coding	42	GC06P052186	35.49	https://www.genecards.org/cgi-bin/carddisp.pl?gene=IL17A
CD4	CD4 Molecule	Protein Coding	49	GC12P006786	35.32	https://www.genecards.org/cgi-bin/carddisp.pl?gene=CD4
HLA-DQA1	Major Histocompatibility Complex, Class II, DQ Alpha 1	Protein Coding	42	GC06P047340	35.27	https://www.genecards.org/cgi-bin/carddisp.pl?gene=HLA-DQA1
MIF	Macrophage Migration Inhibitory Factor	Protein Coding	49	GC22P023894	35.12	https://www.genecards.org/cgi-bin/carddisp.pl?gene=MIF
CXCL8	C-X-C Motif Chemokine Ligand 8	Protein Coding	41	GC04P073740	34.64	https://www.genecards.org/cgi-bin/carddisp.pl?gene=CXCL8
PRF1	Perforin 1	Protein Coding	45	GC10M070597	34.04	https://www.genecards.org/cgi-bin/carddisp.pl?gene=PRF1
HLA-C	Major Histocompatibility Complex, Class I, C	Protein Coding	44	GC06M031272	33.63	https://www.genecards.org/cgi-bin/carddisp.pl?gene=HLA-C
C4A	Complement C4A (Rodgers Blood Group)	Protein Coding	42	GC06P047332	33.56	https://www.genecards.org/cgi-bin/carddisp.pl?gene=C4A
IL12RB1	Interleukin 12 Receptor Subunit Beta 1	Protein Coding	44	GC19M018058	33.31	https://www.genecards.org/cgi-bin/carddisp.pl?gene=IL12RB1
CCR6	C-C Motif Chemokine Receptor 6	Protein Coding	44	GC06P167111	33.05	https://www.genecards.org/cgi-bin/carddisp.pl?gene=CCR6
B2M	Beta-2-Microglobulin	Protein Coding	48	GC15P044711	32.94	https://www.genecards.org/cgi-bin/carddisp.pl?gene=B2M
MRAP	Melanocortin 2 Receptor Accessory Protein	Protein Coding	37	GC21P032291	32.52	https://www.genecards.org/cgi-bin/carddisp.pl?gene=MRAP
SH2D1A	SH2 Domain Containing 1A	Protein Coding	47	GC0XP124227	32.33	https://www.genecards.org/cgi-bin/carddisp.pl?gene=SH2D1A
PRTN3	Proteinase 3	Protein Coding	44	GC19P000840	32.16	https://www.genecards.org/cgi-bin/carddisp.pl?gene=PRTN3
PDCD1	Programmed Cell Death 1	Protein Coding	48	GC02M241849	31.37	https://www.genecards.org/cgi-bin/carddisp.pl?gene=PDCD1
TLR5	Toll Like Receptor 5	Protein Coding	47	GC01M223109	31.36	https://www.genecards.org/cgi-bin/carddisp.pl?gene=TLR5
AIRE	Autoimmune Regulator	Protein Coding	44	GC21P044285	31.14	https://www.genecards.org/cgi-bin/carddisp.pl?gene=AIRE
IKBKG	Inhibitor Of Nuclear Factor Kappa B Kinase Regulatory Subunit Gamma	Protein Coding	48	GC0XP154541	31.11	https://www.genecards.org/cgi-bin/carddisp.pl?gene=IKBKG
PSTPIP1	Proline-Serine-Threonine Phosphatase Interacting Protein 1	Protein Coding	45	GC15P076993	31.02	https://www.genecards.org/cgi-bin/carddisp.pl?gene=PSTPIP1
MYD88	MYD88 Innate Immune Signal Transduction Adaptor	Protein Coding	50	GC03P038179	30.87	https://www.genecards.org/cgi-bin/carddisp.pl?gene=MYD88
C3	Complement C3	Protein Coding	47	GC19M006677	30.84	https://www.genecards.org/cgi-bin/carddisp.pl?gene=C3
FCGR3B	Fc Fragment Of IgG Receptor IIIb	Protein Coding	42	GC01M161623	30.59	https://www.genecards.org/cgi-bin/carddisp.pl?gene=FCGR3B
TP53	Tumor Protein P53	Protein Coding	54	GC17M007661	30.42	https://www.genecards.org/cgi-bin/carddisp.pl?gene=TP53
IL13	Interleukin 13	Protein Coding	44	GC05P132656	29.9	https://www.genecards.org/cgi-bin/carddisp.pl?gene=IL13
CD8A	CD8a Molecule	Protein Coding	46	GC02M086784	29.88	https://www.genecards.org/cgi-bin/carddisp.pl?gene=CD8A
ZAP70	Zeta Chain Of T Cell Receptor Associated Protein Kinase 70	Protein Coding	51	GC02P097696	29.76	https://www.genecards.org/cgi-bin/carddisp.pl?gene=ZAP70
CFH	Complement Factor H	Protein Coding	45	GC01P196621	29.36	https://www.genecards.org/cgi-bin/carddisp.pl?gene=CFH
CRP	C-Reactive Protein	Protein Coding	46	GC01M159716	29.22	https://www.genecards.org/cgi-bin/carddisp.pl?gene=CRP
NLRC4	NLR Family CARD Domain Containing 4	Protein Coding	44	GC02M032224	28.94	https://www.genecards.org/cgi-bin/carddisp.pl?gene=NLRC4
IL18	Interleukin 18	Protein Coding	44	GC11M112143	28.35	https://www.genecards.org/cgi-bin/carddisp.pl?gene=IL18
TGFB2	Transforming Growth Factor Beta 2	Protein Coding	50	GC01P218345	28.14	https://www.genecards.org/cgi-bin/carddisp.pl?gene=TGFB2
IL1RN	Interleukin 1 Receptor Antagonist	Protein Coding	48	GC02P115307	28.03	https://www.genecards.org/cgi-bin/carddisp.pl?gene=IL1RN
IL17F	Interleukin 17F	Protein Coding	41	GC06M052209	27.98	https://www.genecards.org/cgi-bin/carddisp.pl?gene=IL17F
CCL11	C-C Motif Chemokine Ligand 11	Protein Coding	43	GC17P034285	27.89	https://www.genecards.org/cgi-bin/carddisp.pl?gene=CCL11
HLA-DPB1	Major Histocompatibility Complex, Class II, DP Beta 1	Protein Coding	43	GC06P047346	27.8	https://www.genecards.org/cgi-bin/carddisp.pl?gene=HLA-DPB1
FCGR2A	Fc Fragment Of IgG Receptor IIa	Protein Coding	45	GC01P161505	27.77	https://www.genecards.org/cgi-bin/carddisp.pl?gene=FCGR2A
CXCL12	C-X-C Motif Chemokine Ligand 12	Protein Coding	45	GC10M044294	27.63	https://www.genecards.org/cgi-bin/carddisp.pl?gene=CXCL12
IL1A	Interleukin 1 Alpha	Protein Coding	44	GC02M112773	27.58	https://www.genecards.org/cgi-bin/carddisp.pl?gene=IL1A
ICAM1	Intercellular Adhesion Molecule 1	Protein Coding	50	GC19P010270	27.45	https://www.genecards.org/cgi-bin/carddisp.pl?gene=ICAM1
BTK	Bruton Tyrosine Kinase	Protein Coding	53	GC0XM101349	27.44	https://www.genecards.org/cgi-bin/carddisp.pl?gene=BTK
JAK2	Janus Kinase 2	Protein Coding	54	GC09P004985	27.42	https://www.genecards.org/cgi-bin/carddisp.pl?gene=JAK2
TNFRSF1B	TNF Receptor Superfamily Member 1B	Protein Coding	47	GC01P012167	27.4	https://www.genecards.org/cgi-bin/carddisp.pl?gene=TNFRSF1B
IL5	Interleukin 5	Protein Coding	44	GC05M132541	27.3	https://www.genecards.org/cgi-bin/carddisp.pl?gene=IL5
CR2	Complement C3d Receptor 2	Protein Coding	44	GC01P207454	27.28	https://www.genecards.org/cgi-bin/carddisp.pl?gene=CR2
ITGAM	Integrin Subunit Alpha M	Protein Coding	46	GC16P031550	27.22	https://www.genecards.org/cgi-bin/carddisp.pl?gene=ITGAM
TLR9	Toll Like Receptor 9	Protein Coding	45	GC03M052222	26.94	https://www.genecards.org/cgi-bin/carddisp.pl?gene=TLR9
ICOSLG	Inducible T Cell Costimulator Ligand	Protein Coding	39	GC21M044222	26.93	https://www.genecards.org/cgi-bin/carddisp.pl?gene=ICOSLG
LRBA	LPS Responsive Beige-Like Anchor Protein	Protein Coding	41	GC04M150264	26.41	https://www.genecards.org/cgi-bin/carddisp.pl?gene=LRBA
CD28	CD28 Molecule	Protein Coding	47	GC02P203706	26.31	https://www.genecards.org/cgi-bin/carddisp.pl?gene=CD28
MVK	Mevalonate Kinase	Protein Coding	48	GC12P109573	26.3	https://www.genecards.org/cgi-bin/carddisp.pl?gene=MVK
ERAP1	Endoplasmic Reticulum Aminopeptidase 1	Protein Coding	43	GC05M096760	26.15	https://www.genecards.org/cgi-bin/carddisp.pl?gene=ERAP1
IFNA1	Interferon Alpha 1	Protein Coding	39	GC09P021494	26.07	https://www.genecards.org/cgi-bin/carddisp.pl?gene=IFNA1
CCR1	C-C Motif Chemokine Receptor 1	Protein Coding	45	GC03M046218	26.04	https://www.genecards.org/cgi-bin/carddisp.pl?gene=CCR1
RIPK1	Receptor Interacting Serine/Threonine Kinase 1	Protein Coding	49	GC06P003064	26	https://www.genecards.org/cgi-bin/carddisp.pl?gene=RIPK1
MIR146A	MicroRNA 146a	RNA Gene	22	GC05P160485	25.49	https://www.genecards.org/cgi-bin/carddisp.pl?gene=MIR146A
BTNL2	Butyrophilin Like 2	Protein Coding	39	GC06M032393	25.38	https://www.genecards.org/cgi-bin/carddisp.pl?gene=BTNL2
UNC13D	Unc-13 Homolog D	Protein Coding	43	GC17M075827	25.04	https://www.genecards.org/cgi-bin/carddisp.pl?gene=UNC13D
IL1R1	Interleukin 1 Receptor Type 1	Protein Coding	45	GC02P102136	24.74	https://www.genecards.org/cgi-bin/carddisp.pl?gene=IL1R1
LTA	Lymphotoxin Alpha	Protein Coding	42	GC06P047303	24.54	https://www.genecards.org/cgi-bin/carddisp.pl?gene=LTA
ALB	Albumin	Protein Coding	50	GC04P073397	24.53	https://www.genecards.org/cgi-bin/carddisp.pl?gene=ALB
MIR155	MicroRNA 155	RNA Gene	18	GC21P025573	24.51	https://www.genecards.org/cgi-bin/carddisp.pl?gene=MIR155
KIR3DL1	Killer Cell Immunoglobulin Like Receptor, Three Ig Domains And Long Cytoplasmic Tail 1	Protein Coding	40	GC19P055442	24.51	https://www.genecards.org/cgi-bin/carddisp.pl?gene=KIR3DL1
PRKCD	Protein Kinase C Delta	Protein Coding	53	GC03P053156	24.27	https://www.genecards.org/cgi-bin/carddisp.pl?gene=PRKCD
SLC11A1	Solute Carrier Family 11 Member 1	Protein Coding	47	GC02P218382	24.23	https://www.genecards.org/cgi-bin/carddisp.pl?gene=SLC11A1
TNFRSF13C	TNF Receptor Superfamily Member 13C	Protein Coding	44	GC22M045411	24.18	https://www.genecards.org/cgi-bin/carddisp.pl?gene=TNFRSF13C
NFKBIA	NFKB Inhibitor Alpha	Protein Coding	50	GC14M035401	24.11	https://www.genecards.org/cgi-bin/carddisp.pl?gene=NFKBIA
IL15	Interleukin 15	Protein Coding	40	GC04P141636	24.11	https://www.genecards.org/cgi-bin/carddisp.pl?gene=IL15
LACC1	Laccase Domain Containing 1	Protein Coding	35	GC13P043879	23.98	https://www.genecards.org/cgi-bin/carddisp.pl?gene=LACC1
TGFB1	Transforming Growth Factor Beta 1	Protein Coding	52	GC19M041301	23.95	https://www.genecards.org/cgi-bin/carddisp.pl?gene=TGFB1
CARD11	Caspase Recruitment Domain Family Member 11	Protein Coding	47	GC07M002906	23.92	https://www.genecards.org/cgi-bin/carddisp.pl?gene=CARD11
CASP8	Caspase 8	Protein Coding	52	GC02P201233	23.46	https://www.genecards.org/cgi-bin/carddisp.pl?gene=CASP8
CCL5	C-C Motif Chemokine Ligand 5	Protein Coding	43	GC17M035871	23.4	https://www.genecards.org/cgi-bin/carddisp.pl?gene=CCL5
CXCL10	C-X-C Motif Chemokine Ligand 10	Protein Coding	44	GC04M076021	23.33	https://www.genecards.org/cgi-bin/carddisp.pl?gene=CXCL10
TNFSF13B	TNF Superfamily Member 13b	Protein Coding	45	GC13P108251	23.29	https://www.genecards.org/cgi-bin/carddisp.pl?gene=TNFSF13B
TNFRSF4	TNF Receptor Superfamily Member 4	Protein Coding	43	GC01M001211	23.05	https://www.genecards.org/cgi-bin/carddisp.pl?gene=TNFRSF4
NFKB1	Nuclear Factor Kappa B Subunit 1	Protein Coding	52	GC04P102501	22.99	https://www.genecards.org/cgi-bin/carddisp.pl?gene=NFKB1
RBP3	Retinol Binding Protein 3	Protein Coding	40	GC10P047348	22.8	https://www.genecards.org/cgi-bin/carddisp.pl?gene=RBP3
CSF2	Colony Stimulating Factor 2	Protein Coding	44	GC05P132073	22.77	https://www.genecards.org/cgi-bin/carddisp.pl?gene=CSF2
BCL10	BCL10 Immune Signaling Adaptor	Protein Coding	45	GC01M085265	22.75	https://www.genecards.org/cgi-bin/carddisp.pl?gene=BCL10
IFNB1	Interferon Beta 1	Protein Coding	41	GC09M021077	22.65	https://www.genecards.org/cgi-bin/carddisp.pl?gene=IFNB1
CXCR3	C-X-C Motif Chemokine Receptor 3	Protein Coding	44	GC0XM071615	22.65	https://www.genecards.org/cgi-bin/carddisp.pl?gene=CXCR3
SPP1	Secreted Phosphoprotein 1	Protein Coding	46	GC04P087975	22.56	https://www.genecards.org/cgi-bin/carddisp.pl?gene=SPP1
RASGRP1	RAS Guanyl Releasing Protein 1	Protein Coding	46	GC15M038488	22.45	https://www.genecards.org/cgi-bin/carddisp.pl?gene=RASGRP1
NFKB2	Nuclear Factor Kappa B Subunit 2	Protein Coding	52	GC10P102394	22.39	https://www.genecards.org/cgi-bin/carddisp.pl?gene=NFKB2
MIR21	MicroRNA 21	RNA Gene	24	GC17P059841	22.36	https://www.genecards.org/cgi-bin/carddisp.pl?gene=MIR21
IL12A	Interleukin 12A	Protein Coding	44	GC03P159988	22.31	https://www.genecards.org/cgi-bin/carddisp.pl?gene=IL12A
IKBKB	Inhibitor Of Nuclear Factor Kappa B Kinase Subunit Beta	Protein Coding	52	GC08P042271	22.14	https://www.genecards.org/cgi-bin/carddisp.pl?gene=IKBKB
ATM	ATM Serine/Threonine Kinase	Protein Coding	54	GC11P108222	22.12	https://www.genecards.org/cgi-bin/carddisp.pl?gene=ATM
CASP10	Caspase 10	Protein Coding	48	GC02P201182	22.03	https://www.genecards.org/cgi-bin/carddisp.pl?gene=CASP10
DDX58	DExD/H-Box Helicase 58	Protein Coding	47	GC09M032455	21.98	https://www.genecards.org/cgi-bin/carddisp.pl?gene=DDX58
JAK3	Janus Kinase 3	Protein Coding	51	GC19M017824	21.84	https://www.genecards.org/cgi-bin/carddisp.pl?gene=JAK3
CXCR1	C-X-C Motif Chemokine Receptor 1	Protein Coding	43	GC02M218162	21.8	https://www.genecards.org/cgi-bin/carddisp.pl?gene=CXCR1
CD80	CD80 Molecule	Protein Coding	41	GC03M119524	21.77	https://www.genecards.org/cgi-bin/carddisp.pl?gene=CD80
IRF8	Interferon Regulatory Factor 8	Protein Coding	45	GC16P085898	21.56	https://www.genecards.org/cgi-bin/carddisp.pl?gene=IRF8
CCL4	C-C Motif Chemokine Ligand 4	Protein Coding	40	GC17P036103	21.3	https://www.genecards.org/cgi-bin/carddisp.pl?gene=CCL4
CCND1	Cyclin D1	Protein Coding	52	GC11P069641	21.26	https://www.genecards.org/cgi-bin/carddisp.pl?gene=CCND1
CD69	CD69 Molecule	Protein Coding	40	GC12M013857	21.23	https://www.genecards.org/cgi-bin/carddisp.pl?gene=CD69
INS	Insulin	Protein Coding	48	GC11M002159	21.21	https://www.genecards.org/cgi-bin/carddisp.pl?gene=INS
PSMB9	Proteasome 20S Subunit Beta 9	Protein Coding	46	GC06P047342	21.13	https://www.genecards.org/cgi-bin/carddisp.pl?gene=PSMB9
CD86	CD86 Molecule	Protein Coding	43	GC03P122055	21.02	https://www.genecards.org/cgi-bin/carddisp.pl?gene=CD86
CFI	Complement Factor I	Protein Coding	46	GC04M109740	20.96	https://www.genecards.org/cgi-bin/carddisp.pl?gene=CFI
TLR7	Toll Like Receptor 7	Protein Coding	46	GC0XP012867	20.71	https://www.genecards.org/cgi-bin/carddisp.pl?gene=TLR7
MAGT1	Magnesium Transporter 1	Protein Coding	40	GC0XM077826	20.68	https://www.genecards.org/cgi-bin/carddisp.pl?gene=MAGT1
VCAM1	Vascular Cell Adhesion Molecule 1	Protein Coding	45	GC01P100719	20.59	https://www.genecards.org/cgi-bin/carddisp.pl?gene=VCAM1
CD247	CD247 Molecule	Protein Coding	49	GC01M167399	20.25	https://www.genecards.org/cgi-bin/carddisp.pl?gene=CD247
VEGFA	Vascular Endothelial Growth Factor A	Protein Coding	48	GC06P043770	20.24	https://www.genecards.org/cgi-bin/carddisp.pl?gene=VEGFA
HRAS	HRas Proto-Oncogene, GTPase	Protein Coding	52	GC11M000635	20.22	https://www.genecards.org/cgi-bin/carddisp.pl?gene=HRAS
SRC	SRC Proto-Oncogene, Non-Receptor Tyrosine Kinase	Protein Coding	51	GC20P037344	20.19	https://www.genecards.org/cgi-bin/carddisp.pl?gene=SRC
MALT1	MALT1 Paracaspase	Protein Coding	47	GC18P058671	20.04	https://www.genecards.org/cgi-bin/carddisp.pl?gene=MALT1
HSPD1	Heat Shock Protein Family D (Hsp60) Member 1	Protein Coding	47	GC02M197486	19.68	https://www.genecards.org/cgi-bin/carddisp.pl?gene=HSPD1
ADA2	Adenosine Deaminase 2	Protein Coding	34	GC22M017179	19.66	https://www.genecards.org/cgi-bin/carddisp.pl?gene=ADA2
TKT	Transketolase	Protein Coding	46	GC03M053224	19.65	https://www.genecards.org/cgi-bin/carddisp.pl?gene=TKT
NRAS	NRAS Proto-Oncogene, GTPase	Protein Coding	50	GC01M114704	19.58	https://www.genecards.org/cgi-bin/carddisp.pl?gene=NRAS
CD209	CD209 Molecule	Protein Coding	43	GC19M007739	19.41	https://www.genecards.org/cgi-bin/carddisp.pl?gene=CD209
HSPG2	Heparan Sulfate Proteoglycan 2	Protein Coding	45	GC01M021822	19.28	https://www.genecards.org/cgi-bin/carddisp.pl?gene=HSPG2
IFNA2	Interferon Alpha 2	Protein Coding	41	GC09M021384	19	https://www.genecards.org/cgi-bin/carddisp.pl?gene=IFNA2
IL9	Interleukin 9	Protein Coding	43	GC05M135891	18.75	https://www.genecards.org/cgi-bin/carddisp.pl?gene=IL9
SAG	S-Antigen Visual Arrestin	Protein Coding	44	GC02P233311	18.73	https://www.genecards.org/cgi-bin/carddisp.pl?gene=SAG
KLRK1	Killer Cell Lectin Like Receptor K1	Protein Coding	40	GC12M013865	18.6	https://www.genecards.org/cgi-bin/carddisp.pl?gene=KLRK1
KRAS	KRAS Proto-Oncogene, GTPase	Protein Coding	51	GC12M025204	18.33	https://www.genecards.org/cgi-bin/carddisp.pl?gene=KRAS
FCGR3A	Fc Fragment Of IgG Receptor IIIa	Protein Coding	44	GC01M161541	18.23	https://www.genecards.org/cgi-bin/carddisp.pl?gene=FCGR3A
IFNGR2	Interferon Gamma Receptor 2	Protein Coding	43	GC21P033402	18.2	https://www.genecards.org/cgi-bin/carddisp.pl?gene=IFNGR2
ELANE	Elastase, Neutrophil Expressed	Protein Coding	46	GC19P000854	18.06	https://www.genecards.org/cgi-bin/carddisp.pl?gene=ELANE
ACE	Angiotensin I Converting Enzyme	Protein Coding	49	GC17P063477	17.97	https://www.genecards.org/cgi-bin/carddisp.pl?gene=ACE
TLR1	Toll Like Receptor 1	Protein Coding	47	GC04M038797	17.72	https://www.genecards.org/cgi-bin/carddisp.pl?gene=TLR1
TAP1	Transporter 1, ATP Binding Cassette Subfamily B Member	Protein Coding	47	GC06M032865	17.62	https://www.genecards.org/cgi-bin/carddisp.pl?gene=TAP1
DNASE1L3	Deoxyribonuclease 1 Like 3	Protein Coding	43	GC03M058192	17.6	https://www.genecards.org/cgi-bin/carddisp.pl?gene=DNASE1L3
PADI4	Peptidyl Arginine Deiminase 4	Protein Coding	44	GC01P017308	17.59	https://www.genecards.org/cgi-bin/carddisp.pl?gene=PADI4
BIRC3	Baculoviral IAP Repeat Containing 3	Protein Coding	46	GC11P102317	17.43	https://www.genecards.org/cgi-bin/carddisp.pl?gene=BIRC3
CCR4	C-C Motif Chemokine Receptor 4	Protein Coding	45	GC03P032951	17.29	https://www.genecards.org/cgi-bin/carddisp.pl?gene=CCR4
BRCA2	BRCA2 DNA Repair Associated	Protein Coding	49	GC13P032315	17.28	https://www.genecards.org/cgi-bin/carddisp.pl?gene=BRCA2
H2AC18	H2A Clustered Histone 18	Protein Coding	26	GC01M149961	17.27	https://www.genecards.org/cgi-bin/carddisp.pl?gene=H2AC18
SELE	Selectin E	Protein Coding	44	GC01M169722	17.22	https://www.genecards.org/cgi-bin/carddisp.pl?gene=SELE
BRCA1	BRCA1 DNA Repair Associated	Protein Coding	50	GC17M043044	17.2	https://www.genecards.org/cgi-bin/carddisp.pl?gene=BRCA1
IL12B	Interleukin 12B	Protein Coding	44	GC05M159314	17.01	https://www.genecards.org/cgi-bin/carddisp.pl?gene=IL12B
NOD1	Nucleotide Binding Oligomerization Domain Containing 1	Protein Coding	44	GC07M030424	17.01	https://www.genecards.org/cgi-bin/carddisp.pl?gene=NOD1
TPMT	Thiopurine S-Methyltransferase	Protein Coding	47	GC06M018128	17	https://www.genecards.org/cgi-bin/carddisp.pl?gene=TPMT
IDO1	Indoleamine 2,3-Dioxygenase 1	Protein Coding	45	GC08P039891	16.96	https://www.genecards.org/cgi-bin/carddisp.pl?gene=IDO1
HMGB1	High Mobility Group Box 1	Protein Coding	44	GC13M030456	16.79	https://www.genecards.org/cgi-bin/carddisp.pl?gene=HMGB1
LAT	Linker For Activation Of T Cells	Protein Coding	45	GC16P029115	16.77	https://www.genecards.org/cgi-bin/carddisp.pl?gene=LAT
SPINK5	Serine Peptidase Inhibitor Kazal Type 5	Protein Coding	41	GC05P148025	16.75	https://www.genecards.org/cgi-bin/carddisp.pl?gene=SPINK5
BRAF	B-Raf Proto-Oncogene, Serine/Threonine Kinase	Protein Coding	54	GC07M140719	16.64	https://www.genecards.org/cgi-bin/carddisp.pl?gene=BRAF
TAP2	Transporter 2, ATP Binding Cassette Subfamily B Member	Protein Coding	44	GC06M032821	16.63	https://www.genecards.org/cgi-bin/carddisp.pl?gene=TAP2
S100A12	S100 Calcium Binding Protein A12	Protein Coding	39	GC01M153373	16.27	https://www.genecards.org/cgi-bin/carddisp.pl?gene=S100A12
IRF4	Interferon Regulatory Factor 4	Protein Coding	43	GC06P000391	16.25	https://www.genecards.org/cgi-bin/carddisp.pl?gene=IRF4
ITGB2	Integrin Subunit Beta 2	Protein Coding	50	GC21M044885	16.18	https://www.genecards.org/cgi-bin/carddisp.pl?gene=ITGB2
TLR8	Toll Like Receptor 8	Protein Coding	47	GC0XP012924	16.11	https://www.genecards.org/cgi-bin/carddisp.pl?gene=TLR8
TLR6	Toll Like Receptor 6	Protein Coding	44	GC04M038828	16.06	https://www.genecards.org/cgi-bin/carddisp.pl?gene=TLR6
IL7	Interleukin 7	Protein Coding	42	GC08M078689	15.96	https://www.genecards.org/cgi-bin/carddisp.pl?gene=IL7
GZMB	Granzyme B	Protein Coding	45	GC14M024630	15.96	https://www.genecards.org/cgi-bin/carddisp.pl?gene=GZMB
CSF3	Colony Stimulating Factor 3	Protein Coding	40	GC17P040015	15.91	https://www.genecards.org/cgi-bin/carddisp.pl?gene=CSF3
SELL	Selectin L	Protein Coding	42	GC01M169690	15.83	https://www.genecards.org/cgi-bin/carddisp.pl?gene=SELL
IL6R	Interleukin 6 Receptor	Protein Coding	48	GC01P154405	15.75	https://www.genecards.org/cgi-bin/carddisp.pl?gene=IL6R
COL2A1	Collagen Type II Alpha 1 Chain	Protein Coding	48	GC12M047972	15.64	https://www.genecards.org/cgi-bin/carddisp.pl?gene=COL2A1
SERPINA3	Serpin Family A Member 3	Protein Coding	43	GC14P094612	15.54	https://www.genecards.org/cgi-bin/carddisp.pl?gene=SERPINA3
BLM	BLM RecQ Like Helicase	Protein Coding	48	GC15P090717	15.46	https://www.genecards.org/cgi-bin/carddisp.pl?gene=BLM
MICA	MHC Class I Polypeptide-Related Sequence A	Protein Coding	39	GC06P031399	15.42	https://www.genecards.org/cgi-bin/carddisp.pl?gene=MICA
CD14	CD14 Molecule	Protein Coding	44	GC05M140631	15.37	https://www.genecards.org/cgi-bin/carddisp.pl?gene=CD14
CIITA	Class II Major Histocompatibility Complex Transactivator	Protein Coding	45	GC16P010879	15.37	https://www.genecards.org/cgi-bin/carddisp.pl?gene=CIITA
MYC	MYC Proto-Oncogene, BHLH Transcription Factor	Protein Coding	51	GC08P127735	15.2	https://www.genecards.org/cgi-bin/carddisp.pl?gene=MYC
EP300	E1A Binding Protein P300	Protein Coding	50	GC22P041091	15.17	https://www.genecards.org/cgi-bin/carddisp.pl?gene=EP300
CCR3	C-C Motif Chemokine Receptor 3	Protein Coding	47	GC03P046227	15.12	https://www.genecards.org/cgi-bin/carddisp.pl?gene=CCR3
CCR7	C-C Motif Chemokine Receptor 7	Protein Coding	45	GC17M040556	15.04	https://www.genecards.org/cgi-bin/carddisp.pl?gene=CCR7
RIPK2	Receptor Interacting Serine/Threonine Kinase 2	Protein Coding	46	GC08P089758	15.03	https://www.genecards.org/cgi-bin/carddisp.pl?gene=RIPK2
IKZF1	IKAROS Family Zinc Finger 1	Protein Coding	47	GC07P050303	14.96	https://www.genecards.org/cgi-bin/carddisp.pl?gene=IKZF1
NLRP12	NLR Family Pyrin Domain Containing 12	Protein Coding	44	GC19M053793	14.96	https://www.genecards.org/cgi-bin/carddisp.pl?gene=NLRP12
CASP1	Caspase 1	Protein Coding	50	GC11M105025	14.87	https://www.genecards.org/cgi-bin/carddisp.pl?gene=CASP1
IL33	Interleukin 33	Protein Coding	40	GC09P006206	14.78	https://www.genecards.org/cgi-bin/carddisp.pl?gene=IL33
IGH	Immunoglobulin Heavy Locus	Protein Coding	15	GC14M109514	14.77	https://www.genecards.org/cgi-bin/carddisp.pl?gene=IGH
TNFSF15	TNF Superfamily Member 15	Protein Coding	45	GC09M114784	14.69	https://www.genecards.org/cgi-bin/carddisp.pl?gene=TNFSF15
APOH	Apolipoprotein H	Protein Coding	44	GC17M066212	14.68	https://www.genecards.org/cgi-bin/carddisp.pl?gene=APOH
MTOR	Mechanistic Target Of Rapamycin Kinase	Protein Coding	54	GC01M011106	14.57	https://www.genecards.org/cgi-bin/carddisp.pl?gene=MTOR
TREX1	Three Prime Repair Exonuclease 1	Protein Coding	42	GC03P048466	14.53	https://www.genecards.org/cgi-bin/carddisp.pl?gene=TREX1
NUP107	Nucleoporin 107	Protein Coding	43	GC12P068686	14.4	https://www.genecards.org/cgi-bin/carddisp.pl?gene=NUP107
TAPBP	TAP Binding Protein	Protein Coding	43	GC06M033299	14.33	https://www.genecards.org/cgi-bin/carddisp.pl?gene=TAPBP
TGFBR2	Transforming Growth Factor Beta Receptor 2	Protein Coding	51	GC03P030623	14.29	https://www.genecards.org/cgi-bin/carddisp.pl?gene=TGFBR2
TLR10	Toll Like Receptor 10	Protein Coding	40	GC04M038773	14.2	https://www.genecards.org/cgi-bin/carddisp.pl?gene=TLR10
S100A8	S100 Calcium Binding Protein A8	Protein Coding	42	GC01M153391	14.18	https://www.genecards.org/cgi-bin/carddisp.pl?gene=S100A8
CFHR2	Complement Factor H Related 2	Protein Coding	37	GC01P196943	14.16	https://www.genecards.org/cgi-bin/carddisp.pl?gene=CFHR2
JAK1	Janus Kinase 1	Protein Coding	50	GC01M064833	14.15	https://www.genecards.org/cgi-bin/carddisp.pl?gene=JAK1
MIR34A	MicroRNA 34a	RNA Gene	22	GC01M009151	14.14	https://www.genecards.org/cgi-bin/carddisp.pl?gene=MIR34A
IL37	Interleukin 37	Protein Coding	37	GC02P115304	14.12	https://www.genecards.org/cgi-bin/carddisp.pl?gene=IL37
IL22	Interleukin 22	Protein Coding	41	GC12M068248	14.06	https://www.genecards.org/cgi-bin/carddisp.pl?gene=IL22
BCL6	BCL6 Transcription Repressor	Protein Coding	45	GC03M187721	14.04	https://www.genecards.org/cgi-bin/carddisp.pl?gene=BCL6
S100A9	S100 Calcium Binding Protein A9	Protein Coding	43	GC01P153357	14.01	https://www.genecards.org/cgi-bin/carddisp.pl?gene=S100A9
MIR200B	MicroRNA 200b	RNA Gene	20	GC01P001167	14	https://www.genecards.org/cgi-bin/carddisp.pl?gene=MIR200B
IRF5	Interferon Regulatory Factor 5	Protein Coding	48	GC07P128937	13.92	https://www.genecards.org/cgi-bin/carddisp.pl?gene=IRF5
CCR2	C-C Motif Chemokine Receptor 2	Protein Coding	45	GC03P046356	13.9	https://www.genecards.org/cgi-bin/carddisp.pl?gene=CCR2
SELP	Selectin P	Protein Coding	45	GC01M169558	13.84	https://www.genecards.org/cgi-bin/carddisp.pl?gene=SELP
C4B	Complement C4B (Chido Blood Group)	Protein Coding	41	GC06P032014	13.75	https://www.genecards.org/cgi-bin/carddisp.pl?gene=C4B
GATA3	GATA Binding Protein 3	Protein Coding	49	GC10P008045	13.72	https://www.genecards.org/cgi-bin/carddisp.pl?gene=GATA3
OCLN	Occludin	Protein Coding	44	GC05P069492	13.69	https://www.genecards.org/cgi-bin/carddisp.pl?gene=OCLN
CFB	Complement Factor B	Protein Coding	45	GC06P031945	13.65	https://www.genecards.org/cgi-bin/carddisp.pl?gene=CFB
SFTPD	Surfactant Protein D	Protein Coding	44	GC10M079937	13.62	https://www.genecards.org/cgi-bin/carddisp.pl?gene=SFTPD
CD79B	CD79b Molecule	Protein Coding	47	GC17M063928	13.57	https://www.genecards.org/cgi-bin/carddisp.pl?gene=CD79B
IRGM	Immunity Related GTPase M	Protein Coding	38	GC05P150846	13.55	https://www.genecards.org/cgi-bin/carddisp.pl?gene=IRGM
DOCK8	Dedicator Of Cytokinesis 8	Protein Coding	43	GC09P000214	13.55	https://www.genecards.org/cgi-bin/carddisp.pl?gene=DOCK8
JUN	Jun Proto-Oncogene, AP-1 Transcription Factor Subunit	Protein Coding	49	GC01M058780	13.5	https://www.genecards.org/cgi-bin/carddisp.pl?gene=JUN
AICDA	Activation Induced Cytidine Deaminase	Protein Coding	45	GC12M008602	13.45	https://www.genecards.org/cgi-bin/carddisp.pl?gene=AICDA
CDK4	Cyclin Dependent Kinase 4	Protein Coding	54	GC12M057743	13.4	https://www.genecards.org/cgi-bin/carddisp.pl?gene=CDK4
CAT	Catalase	Protein Coding	50	GC11P034460	13.4	https://www.genecards.org/cgi-bin/carddisp.pl?gene=CAT
F2	Coagulation Factor II, Thrombin	Protein Coding	48	GC11P046720	13.36	https://www.genecards.org/cgi-bin/carddisp.pl?gene=F2
CAPN5	Calpain 5	Protein Coding	43	GC11P077066	13.26	https://www.genecards.org/cgi-bin/carddisp.pl?gene=CAPN5
CXCR5	C-X-C Motif Chemokine Receptor 5	Protein Coding	41	GC11P118898	13.2	https://www.genecards.org/cgi-bin/carddisp.pl?gene=CXCR5
NUP133	Nucleoporin 133	Protein Coding	40	GC01M229441	13.2	https://www.genecards.org/cgi-bin/carddisp.pl?gene=NUP133
CXCL9	C-X-C Motif Chemokine Ligand 9	Protein Coding	39	GC04M076001	13.2	https://www.genecards.org/cgi-bin/carddisp.pl?gene=CXCL9
VDR	Vitamin D Receptor	Protein Coding	51	GC12M047841	13.14	https://www.genecards.org/cgi-bin/carddisp.pl?gene=VDR
SERPINA1	Serpin Family A Member 1	Protein Coding	49	GC14M094376	13.13	https://www.genecards.org/cgi-bin/carddisp.pl?gene=SERPINA1
MIR222	MicroRNA 222	RNA Gene	21	GC0XM045747	13.07	https://www.genecards.org/cgi-bin/carddisp.pl?gene=MIR222
TNFRSF18	TNF Receptor Superfamily Member 18	Protein Coding	42	GC01M001203	13.02	https://www.genecards.org/cgi-bin/carddisp.pl?gene=TNFRSF18
IL21	Interleukin 21	Protein Coding	43	GC04M122612	13.01	https://www.genecards.org/cgi-bin/carddisp.pl?gene=IL21
LCN2	Lipocalin 2	Protein Coding	43	GC09P128149	13.01	https://www.genecards.org/cgi-bin/carddisp.pl?gene=LCN2
IRF7	Interferon Regulatory Factor 7	Protein Coding	46	GC11M000612	12.93	https://www.genecards.org/cgi-bin/carddisp.pl?gene=IRF7
IL1RAPL2	Interleukin 1 Receptor Accessory Protein Like 2	Protein Coding	37	GC0XP104566	12.87	https://www.genecards.org/cgi-bin/carddisp.pl?gene=IL1RAPL2
ITGAL	Integrin Subunit Alpha L	Protein Coding	45	GC16P030472	12.86	https://www.genecards.org/cgi-bin/carddisp.pl?gene=ITGAL
XIAP	X-Linked Inhibitor Of Apoptosis	Protein Coding	49	GC0XP123859	12.86	https://www.genecards.org/cgi-bin/carddisp.pl?gene=XIAP
BCL2	BCL2 Apoptosis Regulator	Protein Coding	51	GC18M063123	12.85	https://www.genecards.org/cgi-bin/carddisp.pl?gene=BCL2
TNFRSF8	TNF Receptor Superfamily Member 8	Protein Coding	42	GC01P012063	12.65	https://www.genecards.org/cgi-bin/carddisp.pl?gene=TNFRSF8
ENO1	Enolase 1	Protein Coding	47	GC01M008861	12.62	https://www.genecards.org/cgi-bin/carddisp.pl?gene=ENO1
TNFRSF10A	TNF Receptor Superfamily Member 10a	Protein Coding	45	GC08M023190	12.6	https://www.genecards.org/cgi-bin/carddisp.pl?gene=TNFRSF10A
GBA	Glucosylceramidase Beta	Protein Coding	47	GC01M155234	12.58	https://www.genecards.org/cgi-bin/carddisp.pl?gene=GBA
P2RX7	Purinergic Receptor P2X 7	Protein Coding	45	GC12P122829	12.54	https://www.genecards.org/cgi-bin/carddisp.pl?gene=P2RX7
DKC1	Dyskerin Pseudouridine Synthase 1	Protein Coding	46	GC0XP154762	12.49	https://www.genecards.org/cgi-bin/carddisp.pl?gene=DKC1
MAPK14	Mitogen-Activated Protein Kinase 14	Protein Coding	51	GC06P047451	12.45	https://www.genecards.org/cgi-bin/carddisp.pl?gene=MAPK14
IL27	Interleukin 27	Protein Coding	38	GC16M028511	12.42	https://www.genecards.org/cgi-bin/carddisp.pl?gene=IL27
TRAF6	TNF Receptor Associated Factor 6	Protein Coding	47	GC11M036467	12.39	https://www.genecards.org/cgi-bin/carddisp.pl?gene=TRAF6
STAT6	Signal Transducer And Activator Of Transcription 6	Protein Coding	50	GC12M057095	12.38	https://www.genecards.org/cgi-bin/carddisp.pl?gene=STAT6
IL16	Interleukin 16	Protein Coding	42	GC15P081159	12.38	https://www.genecards.org/cgi-bin/carddisp.pl?gene=IL16
RORC	RAR Related Orphan Receptor C	Protein Coding	45	GC01M151806	12.33	https://www.genecards.org/cgi-bin/carddisp.pl?gene=RORC
MICB	MHC Class I Polypeptide-Related Sequence B	Protein Coding	41	GC06P047300	12.31	https://www.genecards.org/cgi-bin/carddisp.pl?gene=MICB
TIMP1	TIMP Metallopeptidase Inhibitor 1	Protein Coding	45	GC0XP047583	12.3	https://www.genecards.org/cgi-bin/carddisp.pl?gene=TIMP1
C5	Complement C5	Protein Coding	46	GC09M120952	12.29	https://www.genecards.org/cgi-bin/carddisp.pl?gene=C5
MMP9	Matrix Metallopeptidase 9	Protein Coding	52	GC20P046008	12.24	https://www.genecards.org/cgi-bin/carddisp.pl?gene=MMP9
LTF	Lactotransferrin	Protein Coding	43	GC03M046435	12.16	https://www.genecards.org/cgi-bin/carddisp.pl?gene=LTF
KLRC4	Killer Cell Lectin Like Receptor C4	Protein Coding	36	GC12M013866	12.15	https://www.genecards.org/cgi-bin/carddisp.pl?gene=KLRC4
FOS	Fos Proto-Oncogene, AP-1 Transcription Factor Subunit	Protein Coding	50	GC14P075278	12.14	https://www.genecards.org/cgi-bin/carddisp.pl?gene=FOS
CASP3	Caspase 3	Protein Coding	50	GC04M184627	12.06	https://www.genecards.org/cgi-bin/carddisp.pl?gene=CASP3
FGF2	Fibroblast Growth Factor 2	Protein Coding	47	GC04P122826	12.05	https://www.genecards.org/cgi-bin/carddisp.pl?gene=FGF2
ERAP2	Endoplasmic Reticulum Aminopeptidase 2	Protein Coding	37	GC05P096875	12	https://www.genecards.org/cgi-bin/carddisp.pl?gene=ERAP2
PTPN2	Protein Tyrosine Phosphatase Non-Receptor Type 2	Protein Coding	46	GC18M017325	11.92	https://www.genecards.org/cgi-bin/carddisp.pl?gene=PTPN2
TOP2A	DNA Topoisomerase II Alpha	Protein Coding	50	GC17M040388	11.88	https://www.genecards.org/cgi-bin/carddisp.pl?gene=TOP2A
IL12A-AS1	IL12A Antisense RNA 1	RNA Gene	14	GC03M159913	11.88	https://www.genecards.org/cgi-bin/carddisp.pl?gene=IL12A-AS1
RB1	RB Transcriptional Corepressor 1	Protein Coding	49	GC13P048303	11.86	https://www.genecards.org/cgi-bin/carddisp.pl?gene=RB1
TNFSF11	TNF Superfamily Member 11	Protein Coding	47	GC13P042562	11.85	https://www.genecards.org/cgi-bin/carddisp.pl?gene=TNFSF11
MST1	Macrophage Stimulating 1	Protein Coding	44	GC03M049683	11.82	https://www.genecards.org/cgi-bin/carddisp.pl?gene=MST1
CXCR2	C-X-C Motif Chemokine Receptor 2	Protein Coding	48	GC02P218125	11.73	https://www.genecards.org/cgi-bin/carddisp.pl?gene=CXCR2
GUSB	Glucuronidase Beta	Protein Coding	47	GC07M065960	11.7	https://www.genecards.org/cgi-bin/carddisp.pl?gene=GUSB
DPEP1	Dipeptidase 1	Protein Coding	42	GC16P089613	11.69	https://www.genecards.org/cgi-bin/carddisp.pl?gene=DPEP1
GJB2	Gap Junction Protein Beta 2	Protein Coding	47	GC13M020187	11.62	https://www.genecards.org/cgi-bin/carddisp.pl?gene=GJB2
CD44	CD44 Molecule (Indian Blood Group)	Protein Coding	47	GC11P035139	11.61	https://www.genecards.org/cgi-bin/carddisp.pl?gene=CD44
GFAP	Glial Fibrillary Acidic Protein	Protein Coding	47	GC17M044905	11.59	https://www.genecards.org/cgi-bin/carddisp.pl?gene=GFAP
CTSG	Cathepsin G	Protein Coding	44	GC14M024573	11.58	https://www.genecards.org/cgi-bin/carddisp.pl?gene=CTSG
FN1	Fibronectin 1	Protein Coding	50	GC02M215360	11.56	https://www.genecards.org/cgi-bin/carddisp.pl?gene=FN1
GJA1	Gap Junction Protein Alpha 1	Protein Coding	50	GC06P121436	11.54	https://www.genecards.org/cgi-bin/carddisp.pl?gene=GJA1
CP	Ceruloplasmin	Protein Coding	47	GC03M149162	11.54	https://www.genecards.org/cgi-bin/carddisp.pl?gene=CP
PTX3	Pentraxin 3	Protein Coding	41	GC03P157436	11.53	https://www.genecards.org/cgi-bin/carddisp.pl?gene=PTX3
UBAC2	UBA Domain Containing 2	Protein Coding	37	GC13P099200	11.52	https://www.genecards.org/cgi-bin/carddisp.pl?gene=UBAC2
CD5	CD5 Molecule	Protein Coding	41	GC11P061114	11.47	https://www.genecards.org/cgi-bin/carddisp.pl?gene=CD5
TCF4	Transcription Factor 4	Protein Coding	46	GC18M055222	11.38	https://www.genecards.org/cgi-bin/carddisp.pl?gene=TCF4
CX3CR1	C-X3-C Motif Chemokine Receptor 1	Protein Coding	44	GC03M039279	11.34	https://www.genecards.org/cgi-bin/carddisp.pl?gene=CX3CR1
CHUK	Component Of Inhibitor Of Nuclear Factor Kappa B Kinase Complex	Protein Coding	52	GC10M100188	11.23	https://www.genecards.org/cgi-bin/carddisp.pl?gene=CHUK
CXCR4	C-X-C Motif Chemokine Receptor 4	Protein Coding	52	GC02M136114	11.21	https://www.genecards.org/cgi-bin/carddisp.pl?gene=CXCR4
KIR2DL1	Killer Cell Immunoglobulin Like Receptor, Two Ig Domains And Long Cytoplasmic Tail 1	Protein Coding	36	GC19P055437	11.21	https://www.genecards.org/cgi-bin/carddisp.pl?gene=KIR2DL1
CALR	Calreticulin	Protein Coding	51	GC19P012938	11.19	https://www.genecards.org/cgi-bin/carddisp.pl?gene=CALR
SOCS1	Suppressor Of Cytokine Signaling 1	Protein Coding	43	GC16M011255	11.15	https://www.genecards.org/cgi-bin/carddisp.pl?gene=SOCS1
GJC2	Gap Junction Protein Gamma 2	Protein Coding	41	GC01P228175	11.13	https://www.genecards.org/cgi-bin/carddisp.pl?gene=GJC2
GPT	Glutamic--Pyruvic Transaminase	Protein Coding	41	GC08P144502	11.13	https://www.genecards.org/cgi-bin/carddisp.pl?gene=GPT
IL23A	Interleukin 23 Subunit Alpha	Protein Coding	39	GC12P056335	11.06	https://www.genecards.org/cgi-bin/carddisp.pl?gene=IL23A
CAMP	Cathelicidin Antimicrobial Peptide	Protein Coding	41	GC03P048266	11.04	https://www.genecards.org/cgi-bin/carddisp.pl?gene=CAMP
CD59	CD59 Molecule (CD59 Blood Group)	Protein Coding	46	GC11M033704	11.03	https://www.genecards.org/cgi-bin/carddisp.pl?gene=CD59
MMP3	Matrix Metallopeptidase 3	Protein Coding	51	GC11M102835	10.98	https://www.genecards.org/cgi-bin/carddisp.pl?gene=MMP3
ICOS	Inducible T Cell Costimulator	Protein Coding	43	GC02P203937	10.97	https://www.genecards.org/cgi-bin/carddisp.pl?gene=ICOS
PMEL	Premelanosome Protein	Protein Coding	37	GC12M055954	10.95	https://www.genecards.org/cgi-bin/carddisp.pl?gene=PMEL
IRF1	Interferon Regulatory Factor 1	Protein Coding	47	GC05M132481	10.94	https://www.genecards.org/cgi-bin/carddisp.pl?gene=IRF1
HELLS	Helicase, Lymphoid Specific	Protein Coding	45	GC10P094501	10.86	https://www.genecards.org/cgi-bin/carddisp.pl?gene=HELLS
F5	Coagulation Factor V	Protein Coding	45	GC01M169511	10.81	https://www.genecards.org/cgi-bin/carddisp.pl?gene=F5
HSPA4	Heat Shock Protein Family A (Hsp70) Member 4	Protein Coding	41	GC05P133051	10.81	https://www.genecards.org/cgi-bin/carddisp.pl?gene=HSPA4
IL12RB2	Interleukin 12 Receptor Subunit Beta 2	Protein Coding	43	GC01P067307	10.79	https://www.genecards.org/cgi-bin/carddisp.pl?gene=IL12RB2
TTR	Transthyretin	Protein Coding	49	GC18P031557	10.77	https://www.genecards.org/cgi-bin/carddisp.pl?gene=TTR
FANCA	FA Complementation Group A	Protein Coding	48	GC16M089748	10.74	https://www.genecards.org/cgi-bin/carddisp.pl?gene=FANCA
TNFSF10	TNF Superfamily Member 10	Protein Coding	46	GC03M172505	10.73	https://www.genecards.org/cgi-bin/carddisp.pl?gene=TNFSF10
FADD	Fas Associated Via Death Domain	Protein Coding	47	GC11P070203	10.72	https://www.genecards.org/cgi-bin/carddisp.pl?gene=FADD
THBD	Thrombomodulin	Protein Coding	44	GC20M023026	10.68	https://www.genecards.org/cgi-bin/carddisp.pl?gene=THBD
CYP27B1	Cytochrome P450 Family 27 Subfamily B Member 1	Protein Coding	47	GC12M057757	10.59	https://www.genecards.org/cgi-bin/carddisp.pl?gene=CYP27B1
CD1D	CD1d Molecule	Protein Coding	42	GC01P158178	10.55	https://www.genecards.org/cgi-bin/carddisp.pl?gene=CD1D
MET	MET Proto-Oncogene, Receptor Tyrosine Kinase	Protein Coding	54	GC07P116672	10.52	https://www.genecards.org/cgi-bin/carddisp.pl?gene=MET
GPR35	G Protein-Coupled Receptor 35	Protein Coding	43	GC02P240605	10.52	https://www.genecards.org/cgi-bin/carddisp.pl?gene=GPR35
CX3CL1	C-X3-C Motif Chemokine Ligand 1	Protein Coding	42	GC16P057372	10.48	https://www.genecards.org/cgi-bin/carddisp.pl?gene=CX3CL1
AKT1	AKT Serine/Threonine Kinase 1	Protein Coding	54	GC14M104769	10.48	https://www.genecards.org/cgi-bin/carddisp.pl?gene=AKT1
XRCC6	X-Ray Repair Cross Complementing 6	Protein Coding	45	GC22P041622	10.46	https://www.genecards.org/cgi-bin/carddisp.pl?gene=XRCC6
TRIM5	Tripartite Motif Containing 5	Protein Coding	41	GC11M005693	10.45	https://www.genecards.org/cgi-bin/carddisp.pl?gene=TRIM5
RELB	RELB Proto-Oncogene, NF-KB Subunit	Protein Coding	45	GC19P045002	10.4	https://www.genecards.org/cgi-bin/carddisp.pl?gene=RELB
MX1	MX Dynamin Like GTPase 1	Protein Coding	41	GC21P041420	10.4	https://www.genecards.org/cgi-bin/carddisp.pl?gene=MX1
SERPINC1	Serpin Family C Member 1	Protein Coding	48	GC01M174153	10.4	https://www.genecards.org/cgi-bin/carddisp.pl?gene=SERPINC1
BAX	BCL2 Associated X, Apoptosis Regulator	Protein Coding	48	GC19P048954	10.39	https://www.genecards.org/cgi-bin/carddisp.pl?gene=BAX
DNMT1	DNA Methyltransferase 1	Protein Coding	50	GC19M010133	10.35	https://www.genecards.org/cgi-bin/carddisp.pl?gene=DNMT1
MIR142	MicroRNA 142	RNA Gene	20	GC17M058331	10.3	https://www.genecards.org/cgi-bin/carddisp.pl?gene=MIR142
S100B	S100 Calcium Binding Protein B	Protein Coding	45	GC21M047431	10.3	https://www.genecards.org/cgi-bin/carddisp.pl?gene=S100B
IFI16	Interferon Gamma Inducible Protein 16	Protein Coding	42	GC01P158969	10.24	https://www.genecards.org/cgi-bin/carddisp.pl?gene=IFI16
IFNL3	Interferon Lambda 3	Protein Coding	35	GC19M039243	10.2	https://www.genecards.org/cgi-bin/carddisp.pl?gene=IFNL3
TXK	TXK Tyrosine Kinase	Protein Coding	45	GC04M048066	10.14	https://www.genecards.org/cgi-bin/carddisp.pl?gene=TXK
F3	Coagulation Factor III, Tissue Factor	Protein Coding	45	GC01M094530	10.08	https://www.genecards.org/cgi-bin/carddisp.pl?gene=F3
IL18R1	Interleukin 18 Receptor 1	Protein Coding	43	GC02P102311	10.08	https://www.genecards.org/cgi-bin/carddisp.pl?gene=IL18R1
CRYAA	Crystallin Alpha A	Protein Coding	44	GC21P043169	10.07	https://www.genecards.org/cgi-bin/carddisp.pl?gene=CRYAA
PTH	Parathyroid Hormone	Protein Coding	47	GC11M013492	10.02	https://www.genecards.org/cgi-bin/carddisp.pl?gene=PTH
PON1	Paraoxonase 1	Protein Coding	45	GC07M095297	10	https://www.genecards.org/cgi-bin/carddisp.pl?gene=PON1
FOXP1	Forkhead Box P1	Protein Coding	45	GC03M070926	9.97	https://www.genecards.org/cgi-bin/carddisp.pl?gene=FOXP1
VTN	Vitronectin	Protein Coding	44	GC17M029955	9.95	https://www.genecards.org/cgi-bin/carddisp.pl?gene=VTN
FCN2	Ficolin 2	Protein Coding	40	GC09P134864	9.9	https://www.genecards.org/cgi-bin/carddisp.pl?gene=FCN2
CXCL13	C-X-C Motif Chemokine Ligand 13	Protein Coding	41	GC04P077511	9.88	https://www.genecards.org/cgi-bin/carddisp.pl?gene=CXCL13
MALAT1	Metastasis Associated Lung Adenocarcinoma Transcript 1	RNA Gene	24	GC11P065806	9.88	https://www.genecards.org/cgi-bin/carddisp.pl?gene=MALAT1
NOS2	Nitric Oxide Synthase 2	Protein Coding	49	GC17M027756	9.87	https://www.genecards.org/cgi-bin/carddisp.pl?gene=NOS2
CD1A	CD1a Molecule	Protein Coding	41	GC01P158255	9.83	https://www.genecards.org/cgi-bin/carddisp.pl?gene=CD1A
IGHV4-38-2	Immunoglobulin Heavy Variable 4-38-2	Protein Coding	8	GC14U901616	9.79	https://www.genecards.org/cgi-bin/carddisp.pl?gene=IGHV4-38-2
COL9A1	Collagen Type IX Alpha 1 Chain	Protein Coding	43	GC06M070215	9.77	https://www.genecards.org/cgi-bin/carddisp.pl?gene=COL9A1
PPARG	Peroxisome Proliferator Activated Receptor Gamma	Protein Coding	52	GC03P012287	9.7	https://www.genecards.org/cgi-bin/carddisp.pl?gene=PPARG
AIM2	Absent In Melanoma 2	Protein Coding	41	GC01M159062	9.7	https://www.genecards.org/cgi-bin/carddisp.pl?gene=AIM2
TBX21	T-Box Transcription Factor 21	Protein Coding	45	GC17P047733	9.7	https://www.genecards.org/cgi-bin/carddisp.pl?gene=TBX21
CD22	CD22 Molecule	Protein Coding	45	GC19P035319	9.7	https://www.genecards.org/cgi-bin/carddisp.pl?gene=CD22
CDKN1A	Cyclin Dependent Kinase Inhibitor 1A	Protein Coding	50	GC06P047460	9.7	https://www.genecards.org/cgi-bin/carddisp.pl?gene=CDKN1A
MTHFR	Methylenetetrahydrofolate Reductase	Protein Coding	47	GC01M011785	9.63	https://www.genecards.org/cgi-bin/carddisp.pl?gene=MTHFR
CCN2	Cellular Communication Network Factor 2	Protein Coding	39	GC06M131948	9.61	https://www.genecards.org/cgi-bin/carddisp.pl?gene=CCN2
CCL18	C-C Motif Chemokine Ligand 18	Protein Coding	36	GC17P036064	9.56	https://www.genecards.org/cgi-bin/carddisp.pl?gene=CCL18
CD163	CD163 Molecule	Protein Coding	42	GC12M007471	9.46	https://www.genecards.org/cgi-bin/carddisp.pl?gene=CD163
FCER2	Fc Fragment Of IgE Receptor II	Protein Coding	45	GC19M007689	9.46	https://www.genecards.org/cgi-bin/carddisp.pl?gene=FCER2
TJP1	Tight Junction Protein 1	Protein Coding	43	GC15M029699	9.44	https://www.genecards.org/cgi-bin/carddisp.pl?gene=TJP1
SMARCA4	SWI/SNF Related, Matrix Associated, Actin Dependent Regulator Of Chromatin, Subfamily A, Member 4	Protein Coding	50	GC19P010932	9.44	https://www.genecards.org/cgi-bin/carddisp.pl?gene=SMARCA4
MDM2	MDM2 Proto-Oncogene	Protein Coding	52	GC12P068808	9.4	https://www.genecards.org/cgi-bin/carddisp.pl?gene=MDM2
GLUL	Glutamate-Ammonia Ligase	Protein Coding	49	GC01M182350	9.37	https://www.genecards.org/cgi-bin/carddisp.pl?gene=GLUL
UNG	Uracil DNA Glycosylase	Protein Coding	46	GC12P109097	9.36	https://www.genecards.org/cgi-bin/carddisp.pl?gene=UNG
MAPK1	Mitogen-Activated Protein Kinase 1	Protein Coding	51	GC22M021754	9.33	https://www.genecards.org/cgi-bin/carddisp.pl?gene=MAPK1
CFTR	CF Transmembrane Conductance Regulator	Protein Coding	51	GC07P117287	9.28	https://www.genecards.org/cgi-bin/carddisp.pl?gene=CFTR
PRODH	Proline Dehydrogenase 1	Protein Coding	45	GC22M018912	9.28	https://www.genecards.org/cgi-bin/carddisp.pl?gene=PRODH
IL3	Interleukin 3	Protein Coding	44	GC05P132060	9.25	https://www.genecards.org/cgi-bin/carddisp.pl?gene=IL3
BGLAP	Bone Gamma-Carboxyglutamate Protein	Protein Coding	40	GC01P156242	9.25	https://www.genecards.org/cgi-bin/carddisp.pl?gene=BGLAP
KIR2DS1	Killer Cell Immunoglobulin Like Receptor, Two Ig Domains And Short Cytoplasmic Tail 1	Protein Coding	22	GC19Mr00063	9.24	https://www.genecards.org/cgi-bin/carddisp.pl?gene=KIR2DS1
PML	PML Nuclear Body Scaffold	Protein Coding	45	GC15P073994	9.23	https://www.genecards.org/cgi-bin/carddisp.pl?gene=PML
G6PD	Glucose-6-Phosphate Dehydrogenase	Protein Coding	50	GC0XM154531	9.22	https://www.genecards.org/cgi-bin/carddisp.pl?gene=G6PD
EDA	Ectodysplasin A	Protein Coding	41	GC0XP069618	9.21	https://www.genecards.org/cgi-bin/carddisp.pl?gene=EDA
SPG7	SPG7 Matrix AAA Peptidase Subunit, Paraplegin	Protein Coding	43	GC16P089492	9.2	https://www.genecards.org/cgi-bin/carddisp.pl?gene=SPG7
MBP	Myelin Basic Protein	Protein Coding	44	GC18M076978	9.2	https://www.genecards.org/cgi-bin/carddisp.pl?gene=MBP
HLA-DRA	Major Histocompatibility Complex, Class II, DR Alpha	Protein Coding	47	GC06P032439	9.18	https://www.genecards.org/cgi-bin/carddisp.pl?gene=HLA-DRA
PCCA	Propionyl-CoA Carboxylase Subunit Alpha	Protein Coding	45	GC13P100089	9.14	https://www.genecards.org/cgi-bin/carddisp.pl?gene=PCCA
SPN	Sialophorin	Protein Coding	39	GC16P029662	9.12	https://www.genecards.org/cgi-bin/carddisp.pl?gene=SPN
CD1C	CD1c Molecule	Protein Coding	39	GC01P158289	9.11	https://www.genecards.org/cgi-bin/carddisp.pl?gene=CD1C
KIR2DS2	Killer Cell Immunoglobulin Like Receptor, Two Ig Domains And Short Cytoplasmic Tail 2	Protein Coding	24	GC19MR00122	9.07	https://www.genecards.org/cgi-bin/carddisp.pl?gene=KIR2DS2
ABL1	ABL Proto-Oncogene 1, Non-Receptor Tyrosine Kinase	Protein Coding	52	GC09P130713	9.05	https://www.genecards.org/cgi-bin/carddisp.pl?gene=ABL1
NEU1	Neuraminidase 1	Protein Coding	44	GC06M031857	8.97	https://www.genecards.org/cgi-bin/carddisp.pl?gene=NEU1
MME	Membrane Metalloendopeptidase	Protein Coding	50	GC03P155024	8.96	https://www.genecards.org/cgi-bin/carddisp.pl?gene=MME
EDAR	Ectodysplasin A Receptor	Protein Coding	41	GC02M108894	8.96	https://www.genecards.org/cgi-bin/carddisp.pl?gene=EDAR
CSF1	Colony Stimulating Factor 1	Protein Coding	43	GC01P109911	8.92	https://www.genecards.org/cgi-bin/carddisp.pl?gene=CSF1
FBN1	Fibrillin 1	Protein Coding	45	GC15M048408	8.91	https://www.genecards.org/cgi-bin/carddisp.pl?gene=FBN1
RAF1	Raf-1 Proto-Oncogene, Serine/Threonine Kinase	Protein Coding	54	GC03M012583	8.89	https://www.genecards.org/cgi-bin/carddisp.pl?gene=RAF1
MADCAM1	Mucosal Vascular Addressin Cell Adhesion Molecule 1	Protein Coding	37	GC19P000499	8.87	https://www.genecards.org/cgi-bin/carddisp.pl?gene=MADCAM1
CDKN2A	Cyclin Dependent Kinase Inhibitor 2A	Protein Coding	51	GC09M021967	8.87	https://www.genecards.org/cgi-bin/carddisp.pl?gene=CDKN2A
LEP	Leptin	Protein Coding	47	GC07P128241	8.81	https://www.genecards.org/cgi-bin/carddisp.pl?gene=LEP
KIR2DL3	Killer Cell Immunoglobulin Like Receptor, Two Ig Domains And Long Cytoplasmic Tail 3	Protein Coding	36	GC19P055469	8.81	https://www.genecards.org/cgi-bin/carddisp.pl?gene=KIR2DL3
CYP3A4	Cytochrome P450 Family 3 Subfamily A Member 4	Protein Coding	48	GC07M099759	8.8	https://www.genecards.org/cgi-bin/carddisp.pl?gene=CYP3A4
HGF	Hepatocyte Growth Factor	Protein Coding	52	GC07M081699	8.77	https://www.genecards.org/cgi-bin/carddisp.pl?gene=HGF
KIAA1109	KIAA1109	Protein Coding	35	GC04P122152	8.77	https://www.genecards.org/cgi-bin/carddisp.pl?gene=KIAA1109
CDC42	Cell Division Cycle 42	Protein Coding	51	GC01P022057	8.72	https://www.genecards.org/cgi-bin/carddisp.pl?gene=CDC42
STUB1	STIP1 Homology And U-Box Containing Protein 1	Protein Coding	45	GC16P001405	8.65	https://www.genecards.org/cgi-bin/carddisp.pl?gene=STUB1
CFLAR	CASP8 And FADD Like Apoptosis Regulator	Protein Coding	46	GC02P201117	8.62	https://www.genecards.org/cgi-bin/carddisp.pl?gene=CFLAR
APC	APC Regulator Of WNT Signaling Pathway	Protein Coding	48	GC05P112707	8.61	https://www.genecards.org/cgi-bin/carddisp.pl?gene=APC
ERVW-1	Endogenous Retrovirus Group W Member 1, Envelope	Protein Coding	32	GC07M092468	8.6	https://www.genecards.org/cgi-bin/carddisp.pl?gene=ERVW-1
SIRT1	Sirtuin 1	Protein Coding	49	GC10P067884	8.59	https://www.genecards.org/cgi-bin/carddisp.pl?gene=SIRT1
TRIM21	Tripartite Motif Containing 21	Protein Coding	42	GC11M004384	8.46	https://www.genecards.org/cgi-bin/carddisp.pl?gene=TRIM21
KIR2DS4	Killer Cell Immunoglobulin Like Receptor, Two Ig Domains And Short Cytoplasmic Tail 4	Protein Coding	32	GC19P055443	8.45	https://www.genecards.org/cgi-bin/carddisp.pl?gene=KIR2DS4
CD58	CD58 Molecule	Protein Coding	40	GC01M116514	8.37	https://www.genecards.org/cgi-bin/carddisp.pl?gene=CD58
ITGA4	Integrin Subunit Alpha 4	Protein Coding	48	GC02P181456	8.36	https://www.genecards.org/cgi-bin/carddisp.pl?gene=ITGA4
TNFRSF11B	TNF Receptor Superfamily Member 11b	Protein Coding	47	GC08M118923	8.31	https://www.genecards.org/cgi-bin/carddisp.pl?gene=TNFRSF11B
PIK3CG	Phosphatidylinositol-4,5-Bisphosphate 3-Kinase Catalytic Subunit Gamma	Protein Coding	48	GC07P106865	8.3	https://www.genecards.org/cgi-bin/carddisp.pl?gene=PIK3CG
BIRC2	Baculoviral IAP Repeat Containing 2	Protein Coding	45	GC11P102347	8.28	https://www.genecards.org/cgi-bin/carddisp.pl?gene=BIRC2
GNLY	Granulysin	Protein Coding	38	GC02P085685	8.23	https://www.genecards.org/cgi-bin/carddisp.pl?gene=GNLY
ACKR2	Atypical Chemokine Receptor 2	Protein Coding	37	GC03P042804	8.22	https://www.genecards.org/cgi-bin/carddisp.pl?gene=ACKR2
BMP6	Bone Morphogenetic Protein 6	Protein Coding	43	GC06P007726	8.21	https://www.genecards.org/cgi-bin/carddisp.pl?gene=BMP6
TFRC	Transferrin Receptor	Protein Coding	48	GC03M196027	8.18	https://www.genecards.org/cgi-bin/carddisp.pl?gene=TFRC
CDKN1B	Cyclin Dependent Kinase Inhibitor 1B	Protein Coding	48	GC12P012716	8.18	https://www.genecards.org/cgi-bin/carddisp.pl?gene=CDKN1B
TNFRSF25	TNF Receptor Superfamily Member 25	Protein Coding	43	GC01M006460	8.14	https://www.genecards.org/cgi-bin/carddisp.pl?gene=TNFRSF25
CFHR1	Complement Factor H Related 1	Protein Coding	41	GC01P196788	8.11	https://www.genecards.org/cgi-bin/carddisp.pl?gene=CFHR1
SIGLEC5	Sialic Acid Binding Ig Like Lectin 5	Protein Coding	37	GC19M051611	8.08	https://www.genecards.org/cgi-bin/carddisp.pl?gene=SIGLEC5
CCR9	C-C Motif Chemokine Receptor 9	Protein Coding	40	GC03P045903	8.08	https://www.genecards.org/cgi-bin/carddisp.pl?gene=CCR9
RAD54L	RAD54 Like	Protein Coding	45	GC01P046258	8.05	https://www.genecards.org/cgi-bin/carddisp.pl?gene=RAD54L
PPIA	Peptidylprolyl Isomerase A	Protein Coding	47	GC07P044807	8.02	https://www.genecards.org/cgi-bin/carddisp.pl?gene=PPIA
CD36	CD36 Molecule	Protein Coding	48	GC07P080369	8.01	https://www.genecards.org/cgi-bin/carddisp.pl?gene=CD36
HPRT1	Hypoxanthine Phosphoribosyltransferase 1	Protein Coding	48	GC0XP134460	8	https://www.genecards.org/cgi-bin/carddisp.pl?gene=HPRT1
TIMP2	TIMP Metallopeptidase Inhibitor 2	Protein Coding	44	GC17M078852	8	https://www.genecards.org/cgi-bin/carddisp.pl?gene=TIMP2
ALPL	Alkaline Phosphatase, Biomineralization Associated	Protein Coding	50	GC01P021508	7.98	https://www.genecards.org/cgi-bin/carddisp.pl?gene=ALPL
SMARCA2	SWI/SNF Related, Matrix Associated, Actin Dependent Regulator Of Chromatin, Subfamily A, Member 2	Protein Coding	49	GC09P001980	7.97	https://www.genecards.org/cgi-bin/carddisp.pl?gene=SMARCA2
ETS1	ETS Proto-Oncogene 1, Transcription Factor	Protein Coding	49	GC11M128458	7.96	https://www.genecards.org/cgi-bin/carddisp.pl?gene=ETS1
CXCL1	C-X-C Motif Chemokine Ligand 1	Protein Coding	43	GC04P073869	7.89	https://www.genecards.org/cgi-bin/carddisp.pl?gene=CXCL1
SLC17A5	Solute Carrier Family 17 Member 5	Protein Coding	44	GC06M073593	7.88	https://www.genecards.org/cgi-bin/carddisp.pl?gene=SLC17A5
MYCN	MYCN Proto-Oncogene, BHLH Transcription Factor	Protein Coding	46	GC02P015949	7.87	https://www.genecards.org/cgi-bin/carddisp.pl?gene=MYCN
FGFR1	Fibroblast Growth Factor Receptor 1	Protein Coding	55	GC08M038400	7.86	https://www.genecards.org/cgi-bin/carddisp.pl?gene=FGFR1
SS3	Sarcoidosis, Susceptibility To, 3	Genetic Locus	2	GC10U901083	7.86	https://www.genecards.org/cgi-bin/carddisp.pl?gene=SS3
U2AF1	U2 Small Nuclear RNA Auxiliary Factor 1	Protein Coding	41	GC21M043092	7.85	https://www.genecards.org/cgi-bin/carddisp.pl?gene=U2AF1
FCAR	Fc Fragment Of IgA Receptor	Protein Coding	41	GC19P055445	7.83	https://www.genecards.org/cgi-bin/carddisp.pl?gene=FCAR
MT-CYB	Mitochondrially Encoded Cytochrome B	Protein Coding	31	GCMTP014749	7.81	https://www.genecards.org/cgi-bin/carddisp.pl?gene=MT-CYB
TIMM8A	Translocase Of Inner Mitochondrial Membrane 8A	Protein Coding	43	GC0XM101345	7.81	https://www.genecards.org/cgi-bin/carddisp.pl?gene=TIMM8A
ADM	Adrenomedullin	Protein Coding	44	GC11P010304	7.79	https://www.genecards.org/cgi-bin/carddisp.pl?gene=ADM
KIR2DS3	Killer Cell Immunoglobulin Like Receptor, Two Ig Domains And Short Cytoplasmic Tail 3	Protein Coding	24	GC19MR00031	7.79	https://www.genecards.org/cgi-bin/carddisp.pl?gene=KIR2DS3
CISH	Cytokine Inducible SH2 Containing Protein	Protein Coding	44	GC03M050618	7.77	https://www.genecards.org/cgi-bin/carddisp.pl?gene=CISH
EPO	Erythropoietin	Protein Coding	41	GC07P100720	7.75	https://www.genecards.org/cgi-bin/carddisp.pl?gene=EPO
BCL2L11	BCL2 Like 11	Protein Coding	45	GC02P111119	7.74	https://www.genecards.org/cgi-bin/carddisp.pl?gene=BCL2L11
MT-CO1	Mitochondrially Encoded Cytochrome C Oxidase I	Protein Coding	32	GCMTP005906	7.74	https://www.genecards.org/cgi-bin/carddisp.pl?gene=MT-CO1
MPZ	Myelin Protein Zero	Protein Coding	44	GC01M161304	7.73	https://www.genecards.org/cgi-bin/carddisp.pl?gene=MPZ
HAMP	Hepcidin Antimicrobial Peptide	Protein Coding	44	GC19P038216	7.72	https://www.genecards.org/cgi-bin/carddisp.pl?gene=HAMP
KDR	Kinase Insert Domain Receptor	Protein Coding	53	GC04M055078	7.71	https://www.genecards.org/cgi-bin/carddisp.pl?gene=KDR
TNFSF13	TNF Superfamily Member 13	Protein Coding	44	GC17P007558	7.71	https://www.genecards.org/cgi-bin/carddisp.pl?gene=TNFSF13
IGKC	Immunoglobulin Kappa Constant	Protein Coding	32	GC02M089142	7.7	https://www.genecards.org/cgi-bin/carddisp.pl?gene=IGKC
CD68	CD68 Molecule	Protein Coding	40	GC17P007579	7.7	https://www.genecards.org/cgi-bin/carddisp.pl?gene=CD68
POMC	Proopiomelanocortin	Protein Coding	48	GC02M025160	7.69	https://www.genecards.org/cgi-bin/carddisp.pl?gene=POMC
SOCS3	Suppressor Of Cytokine Signaling 3	Protein Coding	44	GC17M078356	7.62	https://www.genecards.org/cgi-bin/carddisp.pl?gene=SOCS3
KDM4C	Lysine Demethylase 4C	Protein Coding	40	GC09P006720	7.62	https://www.genecards.org/cgi-bin/carddisp.pl?gene=KDM4C
CHIT1	Chitinase 1	Protein Coding	43	GC01M203181	7.61	https://www.genecards.org/cgi-bin/carddisp.pl?gene=CHIT1
IL22RA1	Interleukin 22 Receptor Subunit Alpha 1	Protein Coding	39	GC01M024119	7.56	https://www.genecards.org/cgi-bin/carddisp.pl?gene=IL22RA1
TGM1	Transglutaminase 1	Protein Coding	45	GC14M024249	7.55	https://www.genecards.org/cgi-bin/carddisp.pl?gene=TGM1
HSP90AA1	Heat Shock Protein 90 Alpha Family Class A Member 1	Protein Coding	48	GC14M102080	7.55	https://www.genecards.org/cgi-bin/carddisp.pl?gene=HSP90AA1
GGT1	Gamma-Glutamyltransferase 1	Protein Coding	46	GC22P024927	7.53	https://www.genecards.org/cgi-bin/carddisp.pl?gene=GGT1
ANKRD55	Ankyrin Repeat Domain 55	Protein Coding	33	GC05M056099	7.51	https://www.genecards.org/cgi-bin/carddisp.pl?gene=ANKRD55
ATP4A	ATPase H+/K+ Transporting Subunit Alpha	Protein Coding	41	GC19M042544	7.48	https://www.genecards.org/cgi-bin/carddisp.pl?gene=ATP4A
DHFR	Dihydrofolate Reductase	Protein Coding	49	GC05M080626	7.44	https://www.genecards.org/cgi-bin/carddisp.pl?gene=DHFR
CD1B	CD1b Molecule	Protein Coding	39	GC01M158297	7.41	https://www.genecards.org/cgi-bin/carddisp.pl?gene=CD1B
PYCARD	PYD And CARD Domain Containing	Protein Coding	43	GC16M031201	7.41	https://www.genecards.org/cgi-bin/carddisp.pl?gene=PYCARD
CYP2D6	Cytochrome P450 Family 2 Subfamily D Member 6	Protein Coding	48	GC22M042126	7.39	https://www.genecards.org/cgi-bin/carddisp.pl?gene=CYP2D6
FYN	FYN Proto-Oncogene, Src Family Tyrosine Kinase	Protein Coding	48	GC06M111660	7.39	https://www.genecards.org/cgi-bin/carddisp.pl?gene=FYN
HAVCR1	Hepatitis A Virus Cellular Receptor 1	Protein Coding	41	GC05M157028	7.38	https://www.genecards.org/cgi-bin/carddisp.pl?gene=HAVCR1
UNC93B1	Unc-93 Homolog B1, TLR Signaling Regulator	Protein Coding	39	GC11M067991	7.37	https://www.genecards.org/cgi-bin/carddisp.pl?gene=UNC93B1
RIPK3	Receptor Interacting Serine/Threonine Kinase 3	Protein Coding	43	GC14M024336	7.35	https://www.genecards.org/cgi-bin/carddisp.pl?gene=RIPK3
RAD51	RAD51 Recombinase	Protein Coding	52	GC15P040694	7.34	https://www.genecards.org/cgi-bin/carddisp.pl?gene=RAD51
LIG1	DNA Ligase 1	Protein Coding	46	GC19M048115	7.32	https://www.genecards.org/cgi-bin/carddisp.pl?gene=LIG1
FLT1	Fms Related Receptor Tyrosine Kinase 1	Protein Coding	51	GC13M028300	7.31	https://www.genecards.org/cgi-bin/carddisp.pl?gene=FLT1
KLRD1	Killer Cell Lectin Like Receptor D1	Protein Coding	41	GC12P010226	7.3	https://www.genecards.org/cgi-bin/carddisp.pl?gene=KLRD1
WRN	WRN RecQ Like Helicase	Protein Coding	45	GC08P031033	7.3	https://www.genecards.org/cgi-bin/carddisp.pl?gene=WRN
H3C14	H3 Clustered Histone 14	Protein Coding	29	GC01M149963	7.25	https://www.genecards.org/cgi-bin/carddisp.pl?gene=H3C14
TRAF3IP2	TRAF3 Interacting Protein 2	Protein Coding	43	GC06M111555	7.24	https://www.genecards.org/cgi-bin/carddisp.pl?gene=TRAF3IP2
ATP12A	ATPase H+/K+ Transporting Non-Gastric Alpha2 Subunit	Protein Coding	43	GC13P024680	7.23	https://www.genecards.org/cgi-bin/carddisp.pl?gene=ATP12A
PAX5	Paired Box 5	Protein Coding	46	GC09M036828	7.22	https://www.genecards.org/cgi-bin/carddisp.pl?gene=PAX5
CHI3L1	Chitinase 3 Like 1	Protein Coding	43	GC01M203148	7.21	https://www.genecards.org/cgi-bin/carddisp.pl?gene=CHI3L1
MIR199A1	MicroRNA 199a-1	RNA Gene	18	GC19M010792	7.2	https://www.genecards.org/cgi-bin/carddisp.pl?gene=MIR199A1
TAC1	Tachykinin Precursor 1	Protein Coding	43	GC07P097731	7.18	https://www.genecards.org/cgi-bin/carddisp.pl?gene=TAC1
CXCL11	C-X-C Motif Chemokine Ligand 11	Protein Coding	40	GC04M076033	7.15	https://www.genecards.org/cgi-bin/carddisp.pl?gene=CXCL11
TECPR2	Tectonin Beta-Propeller Repeat Containing 2	Protein Coding	35	GC14P102362	7.13	https://www.genecards.org/cgi-bin/carddisp.pl?gene=TECPR2
SDC1	Syndecan 1	Protein Coding	43	GC02M020200	7.12	https://www.genecards.org/cgi-bin/carddisp.pl?gene=SDC1
CYP11B1	Cytochrome P450 Family 11 Subfamily B Member 1	Protein Coding	48	GC08M142872	7.09	https://www.genecards.org/cgi-bin/carddisp.pl?gene=CYP11B1
MT-TF	Mitochondrially Encoded TRNA-Phe (UUU/C)	RNA Gene	14	GCMTP000580	7.06	https://www.genecards.org/cgi-bin/carddisp.pl?gene=MT-TF
MT-TH	Mitochondrially Encoded TRNA-His (CAU/C)	RNA Gene	13	GCMTP012140	7.06	https://www.genecards.org/cgi-bin/carddisp.pl?gene=MT-TH
APOE	Apolipoprotein E	Protein Coding	50	GC19P044906	7.05	https://www.genecards.org/cgi-bin/carddisp.pl?gene=APOE
CXCL5	C-X-C Motif Chemokine Ligand 5	Protein Coding	40	GC04M073995	7.05	https://www.genecards.org/cgi-bin/carddisp.pl?gene=CXCL5
NAT2	N-Acetyltransferase 2	Protein Coding	43	GC08P018391	7.04	https://www.genecards.org/cgi-bin/carddisp.pl?gene=NAT2
DEK	DEK Proto-Oncogene	Protein Coding	40	GC06M018224	7.01	https://www.genecards.org/cgi-bin/carddisp.pl?gene=DEK
NELFCD	Negative Elongation Factor Complex Member C/D	Protein Coding	35	GC20P058981	6.99	https://www.genecards.org/cgi-bin/carddisp.pl?gene=NELFCD
ADAM17	ADAM Metallopeptidase Domain 17	Protein Coding	51	GC02M009488	6.96	https://www.genecards.org/cgi-bin/carddisp.pl?gene=ADAM17
BPI	Bactericidal Permeability Increasing Protein	Protein Coding	41	GC20P038304	6.96	https://www.genecards.org/cgi-bin/carddisp.pl?gene=BPI
CREBBP	CREB Binding Protein	Protein Coding	52	GC16M003726	6.95	https://www.genecards.org/cgi-bin/carddisp.pl?gene=CREBBP
SLPI	Secretory Leukocyte Peptidase Inhibitor	Protein Coding	39	GC20M045252	6.95	https://www.genecards.org/cgi-bin/carddisp.pl?gene=SLPI
H2AX	H2A.X Variant Histone	Protein Coding	35	GC11M119097	6.95	https://www.genecards.org/cgi-bin/carddisp.pl?gene=H2AX
IL19	Interleukin 19	Protein Coding	40	GC01P206770	6.94	https://www.genecards.org/cgi-bin/carddisp.pl?gene=IL19
MIRLET7E	MicroRNA Let-7e	RNA Gene	20	GC19P051718	6.93	https://www.genecards.org/cgi-bin/carddisp.pl?gene=MIRLET7E
TRIP11	Thyroid Hormone Receptor Interactor 11	Protein Coding	42	GC14M091965	6.91	https://www.genecards.org/cgi-bin/carddisp.pl?gene=TRIP11
CDK1	Cyclin Dependent Kinase 1	Protein Coding	45	GC10P060772	6.9	https://www.genecards.org/cgi-bin/carddisp.pl?gene=CDK1
HDAC9	Histone Deacetylase 9	Protein Coding	46	GC07P018086	6.89	https://www.genecards.org/cgi-bin/carddisp.pl?gene=HDAC9
CCND3	Cyclin D3	Protein Coding	47	GC06M041934	6.84	https://www.genecards.org/cgi-bin/carddisp.pl?gene=CCND3
LY96	Lymphocyte Antigen 96	Protein Coding	42	GC08P073991	6.83	https://www.genecards.org/cgi-bin/carddisp.pl?gene=LY96
BMP4	Bone Morphogenetic Protein 4	Protein Coding	49	GC14M053949	6.83	https://www.genecards.org/cgi-bin/carddisp.pl?gene=BMP4
LRP2	LDL Receptor Related Protein 2	Protein Coding	45	GC02M169127	6.78	https://www.genecards.org/cgi-bin/carddisp.pl?gene=LRP2
CXCR6	C-X-C Motif Chemokine Receptor 6	Protein Coding	40	GC03P045982	6.78	https://www.genecards.org/cgi-bin/carddisp.pl?gene=CXCR6
PCNA	Proliferating Cell Nuclear Antigen	Protein Coding	51	GC20M005114	6.75	https://www.genecards.org/cgi-bin/carddisp.pl?gene=PCNA
TACR1	Tachykinin Receptor 1	Protein Coding	45	GC02M075010	6.75	https://www.genecards.org/cgi-bin/carddisp.pl?gene=TACR1
FES	FES Proto-Oncogene, Tyrosine Kinase	Protein Coding	48	GC15P090883	6.71	https://www.genecards.org/cgi-bin/carddisp.pl?gene=FES
CD1E	CD1e Molecule	Protein Coding	39	GC01P158354	6.67	https://www.genecards.org/cgi-bin/carddisp.pl?gene=CD1E
MAS1L	MAS1 Proto-Oncogene Like, G Protein-Coupled Receptor	Protein Coding	35	GC06M029504	6.67	https://www.genecards.org/cgi-bin/carddisp.pl?gene=MAS1L
ALPP	Alkaline Phosphatase, Placental	Protein Coding	46	GC02P232378	6.67	https://www.genecards.org/cgi-bin/carddisp.pl?gene=ALPP
NCR3	Natural Cytotoxicity Triggering Receptor 3	Protein Coding	39	GC06M031588	6.67	https://www.genecards.org/cgi-bin/carddisp.pl?gene=NCR3
HMGCR	3-Hydroxy-3-Methylglutaryl-CoA Reductase	Protein Coding	45	GC05P075336	6.67	https://www.genecards.org/cgi-bin/carddisp.pl?gene=HMGCR
RUNX2	RUNX Family Transcription Factor 2	Protein Coding	47	GC06P047549	6.65	https://www.genecards.org/cgi-bin/carddisp.pl?gene=RUNX2
SPARC	Secreted Protein Acidic And Cysteine Rich	Protein Coding	50	GC05M151639	6.65	https://www.genecards.org/cgi-bin/carddisp.pl?gene=SPARC
LPRS	Leprosy, Susceptibility To 1	Genetic Locus	2	GC10U990119	6.64	https://www.genecards.org/cgi-bin/carddisp.pl?gene=LPRS
POLR3A	RNA Polymerase III Subunit A	Protein Coding	43	GC10M077969	6.64	https://www.genecards.org/cgi-bin/carddisp.pl?gene=POLR3A
MAPK8	Mitogen-Activated Protein Kinase 8	Protein Coding	50	GC10P048306	6.64	https://www.genecards.org/cgi-bin/carddisp.pl?gene=MAPK8
ARF1	ADP Ribosylation Factor 1	Protein Coding	46	GC01P228082	6.63	https://www.genecards.org/cgi-bin/carddisp.pl?gene=ARF1
GIMAP4	GTPase, IMAP Family Member 4	Protein Coding	38	GC07P150568	6.62	https://www.genecards.org/cgi-bin/carddisp.pl?gene=GIMAP4
LNPEP	Leucyl And Cystinyl Aminopeptidase	Protein Coding	45	GC05P096935	6.53	https://www.genecards.org/cgi-bin/carddisp.pl?gene=LNPEP
FURIN	Furin, Paired Basic Amino Acid Cleaving Enzyme	Protein Coding	46	GC15P090868	6.53	https://www.genecards.org/cgi-bin/carddisp.pl?gene=FURIN
CXCL2	C-X-C Motif Chemokine Ligand 2	Protein Coding	40	GC04M074097	6.52	https://www.genecards.org/cgi-bin/carddisp.pl?gene=CXCL2
CYP2C19	Cytochrome P450 Family 2 Subfamily C Member 19	Protein Coding	46	GC10P094762	6.51	https://www.genecards.org/cgi-bin/carddisp.pl?gene=CYP2C19
PTGS2	Prostaglandin-Endoperoxide Synthase 2	Protein Coding	48	GC01M186640	6.49	https://www.genecards.org/cgi-bin/carddisp.pl?gene=PTGS2
FUT2	Fucosyltransferase 2	Protein Coding	44	GC19P048695	6.49	https://www.genecards.org/cgi-bin/carddisp.pl?gene=FUT2
TRIM39	Tripartite Motif Containing 39	Protein Coding	37	GC06P047275	6.48	https://www.genecards.org/cgi-bin/carddisp.pl?gene=TRIM39
FUS	FUS RNA Binding Protein	Protein Coding	44	GC16P031180	6.48	https://www.genecards.org/cgi-bin/carddisp.pl?gene=FUS
IL6ST	Interleukin 6 Signal Transducer	Protein Coding	45	GC05M055935	6.46	https://www.genecards.org/cgi-bin/carddisp.pl?gene=IL6ST
ACTA2	Actin Alpha 2, Smooth Muscle	Protein Coding	48	GC10M088935	6.45	https://www.genecards.org/cgi-bin/carddisp.pl?gene=ACTA2
DLAT	Dihydrolipoamide S-Acetyltransferase	Protein Coding	46	GC11P112024	6.45	https://www.genecards.org/cgi-bin/carddisp.pl?gene=DLAT
PCSK1	Proprotein Convertase Subtilisin/Kexin Type 1	Protein Coding	45	GC05M096391	6.44	https://www.genecards.org/cgi-bin/carddisp.pl?gene=PCSK1
NUP43	Nucleoporin 43	Protein Coding	34	GC06M149724	6.43	https://www.genecards.org/cgi-bin/carddisp.pl?gene=NUP43
RLBP1	Retinaldehyde Binding Protein 1	Protein Coding	44	GC15M089209	6.43	https://www.genecards.org/cgi-bin/carddisp.pl?gene=RLBP1
NUP85	Nucleoporin 85	Protein Coding	39	GC17P075205	6.42	https://www.genecards.org/cgi-bin/carddisp.pl?gene=NUP85
RBCK1	RANBP2-Type And C3HC4-Type Zinc Finger Containing 1	Protein Coding	43	GC20P000407	6.42	https://www.genecards.org/cgi-bin/carddisp.pl?gene=RBCK1
SCGB1A1	Secretoglobin Family 1A Member 1	Protein Coding	40	GC11P062405	6.4	https://www.genecards.org/cgi-bin/carddisp.pl?gene=SCGB1A1
FGF1	Fibroblast Growth Factor 1	Protein Coding	48	GC05M142555	6.4	https://www.genecards.org/cgi-bin/carddisp.pl?gene=FGF1
CCL20	C-C Motif Chemokine Ligand 20	Protein Coding	43	GC02P227813	6.39	https://www.genecards.org/cgi-bin/carddisp.pl?gene=CCL20
PRDM10	PR/SET Domain 10	Protein Coding	34	GC11M129899	6.38	https://www.genecards.org/cgi-bin/carddisp.pl?gene=PRDM10
HCP5	HLA Complex P5	RNA Gene	29	GC06P031400	6.37	https://www.genecards.org/cgi-bin/carddisp.pl?gene=HCP5
THBS1	Thrombospondin 1	Protein Coding	44	GC15P039581	6.37	https://www.genecards.org/cgi-bin/carddisp.pl?gene=THBS1
CTTN	Cortactin	Protein Coding	43	GC11P070398	6.35	https://www.genecards.org/cgi-bin/carddisp.pl?gene=CTTN
CDK6	Cyclin Dependent Kinase 6	Protein Coding	54	GC07M092604	6.34	https://www.genecards.org/cgi-bin/carddisp.pl?gene=CDK6
ENO2	Enolase 2	Protein Coding	47	GC12P006913	6.32	https://www.genecards.org/cgi-bin/carddisp.pl?gene=ENO2
FSCN1	Fascin Actin-Bundling Protein 1	Protein Coding	43	GC07P005592	6.31	https://www.genecards.org/cgi-bin/carddisp.pl?gene=FSCN1
PIK3C2A	Phosphatidylinositol-4-Phosphate 3-Kinase Catalytic Subunit Type 2 Alpha	Protein Coding	47	GC11M017191	6.31	https://www.genecards.org/cgi-bin/carddisp.pl?gene=PIK3C2A
MLKL	Mixed Lineage Kinase Domain Like Pseudokinase	Protein Coding	41	GC16M074672	6.28	https://www.genecards.org/cgi-bin/carddisp.pl?gene=MLKL
CCND2	Cyclin D2	Protein Coding	50	GC12P008103	6.27	https://www.genecards.org/cgi-bin/carddisp.pl?gene=CCND2
TRB	T Cell Receptor Beta Locus	Protein Coding	14	GC07P145138	6.27	https://www.genecards.org/cgi-bin/carddisp.pl?gene=TRB
CDKN2B	Cyclin Dependent Kinase Inhibitor 2B	Protein Coding	47	GC09M022002	6.26	https://www.genecards.org/cgi-bin/carddisp.pl?gene=CDKN2B
PTPN3	Protein Tyrosine Phosphatase Non-Receptor Type 3	Protein Coding	44	GC09M109375	6.26	https://www.genecards.org/cgi-bin/carddisp.pl?gene=PTPN3
NUP160	Nucleoporin 160	Protein Coding	39	GC11M061140	6.25	https://www.genecards.org/cgi-bin/carddisp.pl?gene=NUP160
FST	Follistatin	Protein Coding	46	GC05P053480	6.24	https://www.genecards.org/cgi-bin/carddisp.pl?gene=FST
NR1H4	Nuclear Receptor Subfamily 1 Group H Member 4	Protein Coding	48	GC12P100473	6.21	https://www.genecards.org/cgi-bin/carddisp.pl?gene=NR1H4
ALPI	Alkaline Phosphatase, Intestinal	Protein Coding	43	GC02P232456	6.2	https://www.genecards.org/cgi-bin/carddisp.pl?gene=ALPI
MAPK3	Mitogen-Activated Protein Kinase 3	Protein Coding	49	GC16M030117	6.2	https://www.genecards.org/cgi-bin/carddisp.pl?gene=MAPK3
ABCB11	ATP Binding Cassette Subfamily B Member 11	Protein Coding	45	GC02M168922	6.19	https://www.genecards.org/cgi-bin/carddisp.pl?gene=ABCB11
TREM1	Triggering Receptor Expressed On Myeloid Cells 1	Protein Coding	41	GC06M041267	6.18	https://www.genecards.org/cgi-bin/carddisp.pl?gene=TREM1
WASL	WASP Like Actin Nucleation Promoting Factor	Protein Coding	41	GC07M123681	6.18	https://www.genecards.org/cgi-bin/carddisp.pl?gene=WASL
TCN1	Transcobalamin 1	Protein Coding	40	GC11M061283	6.18	https://www.genecards.org/cgi-bin/carddisp.pl?gene=TCN1
GIMAP2	GTPase, IMAP Family Member 2	Protein Coding	35	GC07P150686	6.17	https://www.genecards.org/cgi-bin/carddisp.pl?gene=GIMAP2
PAM16	Presequence Translocase Associated Motor 16	Protein Coding	36	GC16M004332	6.17	https://www.genecards.org/cgi-bin/carddisp.pl?gene=PAM16
SPI1	Spi-1 Proto-Oncogene	Protein Coding	44	GC11M061125	6.16	https://www.genecards.org/cgi-bin/carddisp.pl?gene=SPI1
SUMO4	Small Ubiquitin Like Modifier 4	Protein Coding	38	GC06P149401	6.15	https://www.genecards.org/cgi-bin/carddisp.pl?gene=SUMO4
UHRF1	Ubiquitin Like With PHD And Ring Finger Domains 1	Protein Coding	40	GC19P004910	6.14	https://www.genecards.org/cgi-bin/carddisp.pl?gene=UHRF1
RNPC3	RNA Binding Region (RNP1, RRM) Containing 3	Protein Coding	35	GC01P103525	6.1	https://www.genecards.org/cgi-bin/carddisp.pl?gene=RNPC3
TRAF2	TNF Receptor Associated Factor 2	Protein Coding	44	GC09P136881	6.1	https://www.genecards.org/cgi-bin/carddisp.pl?gene=TRAF2
SP100	SP100 Nuclear Antigen	Protein Coding	41	GC02P230415	6.07	https://www.genecards.org/cgi-bin/carddisp.pl?gene=SP100
CHEK1	Checkpoint Kinase 1	Protein Coding	50	GC11P125625	6.07	https://www.genecards.org/cgi-bin/carddisp.pl?gene=CHEK1
SMARCB1	SWI/SNF Related, Matrix Associated, Actin Dependent Regulator Of Chromatin, Subfamily B, Member 1	Protein Coding	45	GC22P023786	6.05	https://www.genecards.org/cgi-bin/carddisp.pl?gene=SMARCB1
APPL1	Adaptor Protein, Phosphotyrosine Interacting With PH Domain And Leucine Zipper 1	Protein Coding	45	GC03P057227	5.99	https://www.genecards.org/cgi-bin/carddisp.pl?gene=APPL1
XDH	Xanthine Dehydrogenase	Protein Coding	47	GC02M031294	5.96	https://www.genecards.org/cgi-bin/carddisp.pl?gene=XDH
EBI3	Epstein-Barr Virus Induced 3	Protein Coding	39	GC19P004232	5.95	https://www.genecards.org/cgi-bin/carddisp.pl?gene=EBI3
CDK2	Cyclin Dependent Kinase 2	Protein Coding	52	GC12P055966	5.93	https://www.genecards.org/cgi-bin/carddisp.pl?gene=CDK2
TERF2	Telomeric Repeat Binding Factor 2	Protein Coding	40	GC16M069355	5.92	https://www.genecards.org/cgi-bin/carddisp.pl?gene=TERF2
DMBT1	Deleted In Malignant Brain Tumors 1	Protein Coding	40	GC10P122560	5.92	https://www.genecards.org/cgi-bin/carddisp.pl?gene=DMBT1
HLA-DRB5	Major Histocompatibility Complex, Class II, DR Beta 5	Protein Coding	40	GC06M032683	5.92	https://www.genecards.org/cgi-bin/carddisp.pl?gene=HLA-DRB5
ANKRD49	Ankyrin Repeat Domain 49	Protein Coding	36	GC11P094493	5.9	https://www.genecards.org/cgi-bin/carddisp.pl?gene=ANKRD49
SLC30A7	Solute Carrier Family 30 Member 7	Protein Coding	39	GC01P100824	5.9	https://www.genecards.org/cgi-bin/carddisp.pl?gene=SLC30A7
ARFGAP1	ADP Ribosylation Factor GTPase Activating Protein 1	Protein Coding	42	GC20P063272	5.88	https://www.genecards.org/cgi-bin/carddisp.pl?gene=ARFGAP1
BLOC1S1	Biogenesis Of Lysosomal Organelles Complex 1 Subunit 1	Protein Coding	36	GC12P055718	5.88	https://www.genecards.org/cgi-bin/carddisp.pl?gene=BLOC1S1
DYNLT1	Dynein Light Chain Tctex-Type 1	Protein Coding	37	GC06M158636	5.87	https://www.genecards.org/cgi-bin/carddisp.pl?gene=DYNLT1
ATN1	Atrophin 1	Protein Coding	43	GC12P008222	5.86	https://www.genecards.org/cgi-bin/carddisp.pl?gene=ATN1
SAA1	Serum Amyloid A1	Protein Coding	42	GC11P018267	5.86	https://www.genecards.org/cgi-bin/carddisp.pl?gene=SAA1
TEC	Tec Protein Tyrosine Kinase	Protein Coding	45	GC04M048137	5.85	https://www.genecards.org/cgi-bin/carddisp.pl?gene=TEC
MBTPS2	Membrane Bound Transcription Factor Peptidase, Site 2	Protein Coding	43	GC0XP021839	5.8	https://www.genecards.org/cgi-bin/carddisp.pl?gene=MBTPS2
CARD14	Caspase Recruitment Domain Family Member 14	Protein Coding	43	GC17P080170	5.79	https://www.genecards.org/cgi-bin/carddisp.pl?gene=CARD14
NGF	Nerve Growth Factor	Protein Coding	50	GC01M115285	5.79	https://www.genecards.org/cgi-bin/carddisp.pl?gene=NGF
CDC25A	Cell Division Cycle 25A	Protein Coding	47	GC03M048173	5.79	https://www.genecards.org/cgi-bin/carddisp.pl?gene=CDC25A
TSPAN12	Tetraspanin 12	Protein Coding	43	GC07M120787	5.78	https://www.genecards.org/cgi-bin/carddisp.pl?gene=TSPAN12
LPRS6	Leprosy, Susceptiblity To, 6	Genetic Locus	2	GC13U900765	5.78	https://www.genecards.org/cgi-bin/carddisp.pl?gene=LPRS6
PSC	Cholangitis, Primary Sclerosing	Genetic Locus	2	GC03U901834	5.78	https://www.genecards.org/cgi-bin/carddisp.pl?gene=PSC
PTPRJ	Protein Tyrosine Phosphatase Receptor Type J	Protein Coding	45	GC11P048002	5.77	https://www.genecards.org/cgi-bin/carddisp.pl?gene=PTPRJ
FAF1	Fas Associated Factor 1	Protein Coding	43	GC01M050439	5.77	https://www.genecards.org/cgi-bin/carddisp.pl?gene=FAF1
LIN54	Lin-54 DREAM MuvB Core Complex Component	Protein Coding	36	GC04M082909	5.74	https://www.genecards.org/cgi-bin/carddisp.pl?gene=LIN54
LINC01554	Long Intergenic Non-Protein Coding RNA 1554	RNA Gene	21	GC05P095838	5.74	https://www.genecards.org/cgi-bin/carddisp.pl?gene=LINC01554
COL1A2	Collagen Type I Alpha 2 Chain	Protein Coding	47	GC07P094394	5.7	https://www.genecards.org/cgi-bin/carddisp.pl?gene=COL1A2
IFNAR1	Interferon Alpha And Beta Receptor Subunit 1	Protein Coding	45	GC21P033324	5.7	https://www.genecards.org/cgi-bin/carddisp.pl?gene=IFNAR1
MIR320A	MicroRNA 320a	RNA Gene	20	GC08M022246	5.7	https://www.genecards.org/cgi-bin/carddisp.pl?gene=MIR320A
JAG1	Jagged Canonical Notch Ligand 1	Protein Coding	50	GC20M010637	5.7	https://www.genecards.org/cgi-bin/carddisp.pl?gene=JAG1
HDAC1	Histone Deacetylase 1	Protein Coding	49	GC01P032292	5.69	https://www.genecards.org/cgi-bin/carddisp.pl?gene=HDAC1
MUC5AC	Mucin 5AC, Oligomeric Mucus/Gel-Forming	Protein Coding	39	GC11P001151	5.69	https://www.genecards.org/cgi-bin/carddisp.pl?gene=MUC5AC
SOD1	Superoxide Dismutase 1	Protein Coding	51	GC21P031659	5.69	https://www.genecards.org/cgi-bin/carddisp.pl?gene=SOD1
HAPLN1	Hyaluronan And Proteoglycan Link Protein 1	Protein Coding	42	GC05M083637	5.68	https://www.genecards.org/cgi-bin/carddisp.pl?gene=HAPLN1
RECQL4	RecQ Like Helicase 4	Protein Coding	41	GC08M144512	5.67	https://www.genecards.org/cgi-bin/carddisp.pl?gene=RECQL4
FLNA	Filamin A	Protein Coding	49	GC0XM154348	5.66	https://www.genecards.org/cgi-bin/carddisp.pl?gene=FLNA
LGALS1	Galectin 1	Protein Coding	43	GC22P037675	5.66	https://www.genecards.org/cgi-bin/carddisp.pl?gene=LGALS1
HMGB2	High Mobility Group Box 2	Protein Coding	42	GC04M173331	5.65	https://www.genecards.org/cgi-bin/carddisp.pl?gene=HMGB2
MIR198	MicroRNA 198	RNA Gene	16	GC03M120395	5.65	https://www.genecards.org/cgi-bin/carddisp.pl?gene=MIR198
MATK	Megakaryocyte-Associated Tyrosine Kinase	Protein Coding	45	GC19M003777	5.62	https://www.genecards.org/cgi-bin/carddisp.pl?gene=MATK
ALPG	Alkaline Phosphatase, Germ Cell	Protein Coding	32	GC02P232407	5.62	https://www.genecards.org/cgi-bin/carddisp.pl?gene=ALPG
SEPSECS	Sep (O-Phosphoserine) TRNA:Sec (Selenocysteine) TRNA Synthase	Protein Coding	43	GC04M025121	5.59	https://www.genecards.org/cgi-bin/carddisp.pl?gene=SEPSECS
SLC30A5	Solute Carrier Family 30 Member 5	Protein Coding	41	GC05P069093	5.59	https://www.genecards.org/cgi-bin/carddisp.pl?gene=SLC30A5
GET1	Guided Entry Of Tail-Anchored Proteins Factor 1	Protein Coding	27	GC21P039377	5.59	https://www.genecards.org/cgi-bin/carddisp.pl?gene=GET1
HLA-DQA2	Major Histocompatibility Complex, Class II, DQ Alpha 2	Protein Coding	37	GC06P032741	5.57	https://www.genecards.org/cgi-bin/carddisp.pl?gene=HLA-DQA2
ARFGAP3	ADP Ribosylation Factor GTPase Activating Protein 3	Protein Coding	40	GC22M042796	5.56	https://www.genecards.org/cgi-bin/carddisp.pl?gene=ARFGAP3
VILL	Villin Like	Protein Coding	35	GC03P037989	5.56	https://www.genecards.org/cgi-bin/carddisp.pl?gene=VILL
SKP2	S-Phase Kinase Associated Protein 2	Protein Coding	44	GC05P036103	5.56	https://www.genecards.org/cgi-bin/carddisp.pl?gene=SKP2
AHCTF1	AT-Hook Containing Transcription Factor 1	Protein Coding	36	GC01M246840	5.55	https://www.genecards.org/cgi-bin/carddisp.pl?gene=AHCTF1
SRSF6	Serine And Arginine Rich Splicing Factor 6	Protein Coding	39	GC20P043457	5.55	https://www.genecards.org/cgi-bin/carddisp.pl?gene=SRSF6
CYP1A2	Cytochrome P450 Family 1 Subfamily A Member 2	Protein Coding	45	GC15P074748	5.54	https://www.genecards.org/cgi-bin/carddisp.pl?gene=CYP1A2
LILRA2	Leukocyte Immunoglobulin Like Receptor A2	Protein Coding	39	GC19P054572	5.54	https://www.genecards.org/cgi-bin/carddisp.pl?gene=LILRA2
MTCP1	Mature T Cell Proliferation 1	Protein Coding	35	GC0XM155062	5.54	https://www.genecards.org/cgi-bin/carddisp.pl?gene=MTCP1
NCAM1	Neural Cell Adhesion Molecule 1	Protein Coding	45	GC11P112961	5.52	https://www.genecards.org/cgi-bin/carddisp.pl?gene=NCAM1
F13A1	Coagulation Factor XIII A Chain	Protein Coding	45	GC06M006144	5.5	https://www.genecards.org/cgi-bin/carddisp.pl?gene=F13A1
IVD	Isovaleryl-CoA Dehydrogenase	Protein Coding	45	GC15P040405	5.5	https://www.genecards.org/cgi-bin/carddisp.pl?gene=IVD
MIR494	MicroRNA 494	RNA Gene	17	GC14P104814	5.49	https://www.genecards.org/cgi-bin/carddisp.pl?gene=MIR494
HOTAIR	HOX Transcript Antisense RNA	RNA Gene	25	GC12M053962	5.49	https://www.genecards.org/cgi-bin/carddisp.pl?gene=HOTAIR
HOXA1	Homeobox A1	Protein Coding	44	GC07M027092	5.44	https://www.genecards.org/cgi-bin/carddisp.pl?gene=HOXA1
PECAM1	Platelet And Endothelial Cell Adhesion Molecule 1	Protein Coding	40	GC17M064319	5.43	https://www.genecards.org/cgi-bin/carddisp.pl?gene=PECAM1
VIP	Vasoactive Intestinal Peptide	Protein Coding	44	GC06P152750	5.43	https://www.genecards.org/cgi-bin/carddisp.pl?gene=VIP
PRKCB	Protein Kinase C Beta	Protein Coding	47	GC16P023892	5.42	https://www.genecards.org/cgi-bin/carddisp.pl?gene=PRKCB
LRRK2	Leucine Rich Repeat Kinase 2	Protein Coding	49	GC12P040196	5.41	https://www.genecards.org/cgi-bin/carddisp.pl?gene=LRRK2
CLPS	Colipase	Protein Coding	40	GC06M042222	5.4	https://www.genecards.org/cgi-bin/carddisp.pl?gene=CLPS
COL1A1	Collagen Type I Alpha 1 Chain	Protein Coding	50	GC17M050183	5.4	https://www.genecards.org/cgi-bin/carddisp.pl?gene=COL1A1
DNAL1	Dynein Axonemal Light Chain 1	Protein Coding	41	GC14P073644	5.38	https://www.genecards.org/cgi-bin/carddisp.pl?gene=DNAL1
NT5C	5', 3'-Nucleotidase, Cytosolic	Protein Coding	41	GC17M075130	5.37	https://www.genecards.org/cgi-bin/carddisp.pl?gene=NT5C
RAB3IL1	RAB3A Interacting Protein Like 1	Protein Coding	37	GC11M061897	5.37	https://www.genecards.org/cgi-bin/carddisp.pl?gene=RAB3IL1
ARFGAP2	ADP Ribosylation Factor GTPase Activating Protein 2	Protein Coding	36	GC11M061114	5.37	https://www.genecards.org/cgi-bin/carddisp.pl?gene=ARFGAP2
MTUS2	Microtubule Associated Scaffold Protein 2	Protein Coding	34	GC13P028820	5.37	https://www.genecards.org/cgi-bin/carddisp.pl?gene=MTUS2
PGF	Placental Growth Factor	Protein Coding	43	GC14M074941	5.36	https://www.genecards.org/cgi-bin/carddisp.pl?gene=PGF
TCN2	Transcobalamin 2	Protein Coding	44	GC22P030606	5.33	https://www.genecards.org/cgi-bin/carddisp.pl?gene=TCN2
AFP	Alpha Fetoprotein	Protein Coding	45	GC04P073431	5.33	https://www.genecards.org/cgi-bin/carddisp.pl?gene=AFP
UACA	Uveal Autoantigen With Coiled-Coil Domains And Ankyrin Repeats	Protein Coding	36	GC15M070654	5.33	https://www.genecards.org/cgi-bin/carddisp.pl?gene=UACA
LCOR	Ligand Dependent Nuclear Receptor Corepressor	Protein Coding	37	GC10P096832	5.32	https://www.genecards.org/cgi-bin/carddisp.pl?gene=LCOR
SERPING1	Serpin Family G Member 1	Protein Coding	46	GC11P057597	5.3	https://www.genecards.org/cgi-bin/carddisp.pl?gene=SERPING1
COL11A2	Collagen Type XI Alpha 2 Chain	Protein Coding	44	GC06M033162	5.28	https://www.genecards.org/cgi-bin/carddisp.pl?gene=COL11A2
DPYSL5	Dihydropyrimidinase Like 5	Protein Coding	37	GC02P026847	5.25	https://www.genecards.org/cgi-bin/carddisp.pl?gene=DPYSL5
ABCB4	ATP Binding Cassette Subfamily B Member 4	Protein Coding	45	GC07M087401	5.24	https://www.genecards.org/cgi-bin/carddisp.pl?gene=ABCB4
DHPS	Deoxyhypusine Synthase	Protein Coding	41	GC19M012684	5.23	https://www.genecards.org/cgi-bin/carddisp.pl?gene=DHPS
KRT19	Keratin 19	Protein Coding	45	GC17M041523	5.23	https://www.genecards.org/cgi-bin/carddisp.pl?gene=KRT19
EPHX1	Epoxide Hydrolase 1	Protein Coding	47	GC01P225810	5.23	https://www.genecards.org/cgi-bin/carddisp.pl?gene=EPHX1
C1orf141	Chromosome 1 Open Reading Frame 141	Protein Coding	27	GC01M067092	5.21	https://www.genecards.org/cgi-bin/carddisp.pl?gene=C1orf141
PSORS1C1	Psoriasis Susceptibility 1 Candidate 1	Protein Coding	28	GC06P031114	5.21	https://www.genecards.org/cgi-bin/carddisp.pl?gene=PSORS1C1
MEG3	Maternally Expressed 3	RNA Gene	29	GC14P104771	5.21	https://www.genecards.org/cgi-bin/carddisp.pl?gene=MEG3
CDKN2C	Cyclin Dependent Kinase Inhibitor 2C	Protein Coding	45	GC01P050960	5.2	https://www.genecards.org/cgi-bin/carddisp.pl?gene=CDKN2C
JRKL	JRK Like	Protein Coding	33	GC11P096389	5.2	https://www.genecards.org/cgi-bin/carddisp.pl?gene=JRKL
CCDC180	Coiled-Coil Domain Containing 180	Protein Coding	32	GC09P097307	5.2	https://www.genecards.org/cgi-bin/carddisp.pl?gene=CCDC180
ANKRD20A1	Ankyrin Repeat Domain 20 Family Member A1	Protein Coding	28	GC09P067832	5.18	https://www.genecards.org/cgi-bin/carddisp.pl?gene=ANKRD20A1
KRT7	Keratin 7	Protein Coding	41	GC12P052232	5.16	https://www.genecards.org/cgi-bin/carddisp.pl?gene=KRT7
CLDN11	Claudin 11	Protein Coding	40	GC03P170418	5.15	https://www.genecards.org/cgi-bin/carddisp.pl?gene=CLDN11
CEBPA	CCAAT Enhancer Binding Protein Alpha	Protein Coding	47	GC19M033299	5.15	https://www.genecards.org/cgi-bin/carddisp.pl?gene=CEBPA
LPIN2	Lipin 2	Protein Coding	42	GC18M002906	5.15	https://www.genecards.org/cgi-bin/carddisp.pl?gene=LPIN2
RBBP4	RB Binding Protein 4, Chromatin Remodeling Factor	Protein Coding	43	GC01P032651	5.14	https://www.genecards.org/cgi-bin/carddisp.pl?gene=RBBP4
RHO	Rhodopsin	Protein Coding	47	GC03P130619	5.14	https://www.genecards.org/cgi-bin/carddisp.pl?gene=RHO
SDHD	Succinate Dehydrogenase Complex Subunit D	Protein Coding	44	GC11P112087	5.13	https://www.genecards.org/cgi-bin/carddisp.pl?gene=SDHD
MYOD1	Myogenic Differentiation 1	Protein Coding	46	GC11P017741	5.13	https://www.genecards.org/cgi-bin/carddisp.pl?gene=MYOD1
MLANA	Melan-A	Protein Coding	39	GC09P005846	5.12	https://www.genecards.org/cgi-bin/carddisp.pl?gene=MLANA
CNTN2	Contactin 2	Protein Coding	45	GC01P205043	5.11	https://www.genecards.org/cgi-bin/carddisp.pl?gene=CNTN2
ATF2	Activating Transcription Factor 2	Protein Coding	45	GC02M175072	5.1	https://www.genecards.org/cgi-bin/carddisp.pl?gene=ATF2
RBBP7	RB Binding Protein 7, Chromatin Remodeling Factor	Protein Coding	40	GC0XM016839	5.09	https://www.genecards.org/cgi-bin/carddisp.pl?gene=RBBP7
TRA	T Cell Receptor Alpha Locus	Protein Coding	17	GC14P021621	5.04	https://www.genecards.org/cgi-bin/carddisp.pl?gene=TRA
VKORC1	Vitamin K Epoxide Reductase Complex Subunit 1	Protein Coding	47	GC16M031105	5.01	https://www.genecards.org/cgi-bin/carddisp.pl?gene=VKORC1
IL20	Interleukin 20	Protein Coding	39	GC01P206866	4.99	https://www.genecards.org/cgi-bin/carddisp.pl?gene=IL20
FANCM	FA Complementation Group M	Protein Coding	42	GC14P045135	4.99	https://www.genecards.org/cgi-bin/carddisp.pl?gene=FANCM
COMP	Cartilage Oligomeric Matrix Protein	Protein Coding	47	GC19M018783	4.98	https://www.genecards.org/cgi-bin/carddisp.pl?gene=COMP
MUS81	MUS81 Structure-Specific Endonuclease Subunit	Protein Coding	42	GC11P065883	4.97	https://www.genecards.org/cgi-bin/carddisp.pl?gene=MUS81
SELPLG	Selectin P Ligand	Protein Coding	42	GC12M108621	4.96	https://www.genecards.org/cgi-bin/carddisp.pl?gene=SELPLG
CYP7A1	Cytochrome P450 Family 7 Subfamily A Member 1	Protein Coding	42	GC08M058476	4.95	https://www.genecards.org/cgi-bin/carddisp.pl?gene=CYP7A1
ATOH7	Atonal BHLH Transcription Factor 7	Protein Coding	39	GC10M068230	4.95	https://www.genecards.org/cgi-bin/carddisp.pl?gene=ATOH7
IL18RAP	Interleukin 18 Receptor Accessory Protein	Protein Coding	39	GC02P102418	4.95	https://www.genecards.org/cgi-bin/carddisp.pl?gene=IL18RAP
INAVA	Innate Immunity Activator	Protein Coding	28	GC01P200892	4.93	https://www.genecards.org/cgi-bin/carddisp.pl?gene=INAVA
PRKN	Parkin RBR E3 Ubiquitin Protein Ligase	Protein Coding	40	GC06M161348	4.92	https://www.genecards.org/cgi-bin/carddisp.pl?gene=PRKN
COL5A2	Collagen Type V Alpha 2 Chain	Protein Coding	41	GC02M189031	4.9	https://www.genecards.org/cgi-bin/carddisp.pl?gene=COL5A2
SOD2	Superoxide Dismutase 2	Protein Coding	51	GC06M159669	4.9	https://www.genecards.org/cgi-bin/carddisp.pl?gene=SOD2
PPIG	Peptidylprolyl Isomerase G	Protein Coding	41	GC02P169584	4.88	https://www.genecards.org/cgi-bin/carddisp.pl?gene=PPIG
LINC01194	Long Intergenic Non-Protein Coding RNA 1194	RNA Gene	17	GC05P012578	4.87	https://www.genecards.org/cgi-bin/carddisp.pl?gene=LINC01194
HTRA1	HtrA Serine Peptidase 1	Protein Coding	43	GC10P122461	4.87	https://www.genecards.org/cgi-bin/carddisp.pl?gene=HTRA1
NUP210	Nucleoporin 210	Protein Coding	39	GC03M015777	4.86	https://www.genecards.org/cgi-bin/carddisp.pl?gene=NUP210
CEP290	Centrosomal Protein 290	Protein Coding	40	GC12M088049	4.84	https://www.genecards.org/cgi-bin/carddisp.pl?gene=CEP290
VIM	Vimentin	Protein Coding	50	GC10P017227	4.8	https://www.genecards.org/cgi-bin/carddisp.pl?gene=VIM
EPCAM	Epithelial Cell Adhesion Molecule	Protein Coding	47	GC02P047345	4.8	https://www.genecards.org/cgi-bin/carddisp.pl?gene=EPCAM
CRH	Corticotropin Releasing Hormone	Protein Coding	44	GC08M066176	4.79	https://www.genecards.org/cgi-bin/carddisp.pl?gene=CRH
TGFBR3	Transforming Growth Factor Beta Receptor 3	Protein Coding	45	GC01M091680	4.79	https://www.genecards.org/cgi-bin/carddisp.pl?gene=TGFBR3
SOX9	SRY-Box Transcription Factor 9	Protein Coding	47	GC17P072121	4.78	https://www.genecards.org/cgi-bin/carddisp.pl?gene=SOX9
CNR2	Cannabinoid Receptor 2	Protein Coding	45	GC01M023870	4.77	https://www.genecards.org/cgi-bin/carddisp.pl?gene=CNR2
IL1RAP	Interleukin 1 Receptor Accessory Protein	Protein Coding	43	GC03P190514	4.76	https://www.genecards.org/cgi-bin/carddisp.pl?gene=IL1RAP
MMAB	Metabolism Of Cobalamin Associated B	Protein Coding	45	GC12M109553	4.75	https://www.genecards.org/cgi-bin/carddisp.pl?gene=MMAB
AHR	Aryl Hydrocarbon Receptor	Protein Coding	48	GC07P016916	4.74	https://www.genecards.org/cgi-bin/carddisp.pl?gene=AHR
SLC9A3	Solute Carrier Family 9 Member A3	Protein Coding	47	GC05M000472	4.73	https://www.genecards.org/cgi-bin/carddisp.pl?gene=SLC9A3
AQP1	Aquaporin 1 (Colton Blood Group)	Protein Coding	45	GC07P030911	4.73	https://www.genecards.org/cgi-bin/carddisp.pl?gene=AQP1
CLEC16A	C-Type Lectin Domain Containing 16A	Protein Coding	37	GC16P010944	4.72	https://www.genecards.org/cgi-bin/carddisp.pl?gene=CLEC16A
MAP2K1	Mitogen-Activated Protein Kinase Kinase 1	Protein Coding	54	GC15P066386	4.72	https://www.genecards.org/cgi-bin/carddisp.pl?gene=MAP2K1
CXCL6	C-X-C Motif Chemokine Ligand 6	Protein Coding	40	GC04P073837	4.7	https://www.genecards.org/cgi-bin/carddisp.pl?gene=CXCL6
TOP3A	DNA Topoisomerase III Alpha	Protein Coding	42	GC17M018271	4.7	https://www.genecards.org/cgi-bin/carddisp.pl?gene=TOP3A
SERPINF1	Serpin Family F Member 1	Protein Coding	44	GC17P001761	4.69	https://www.genecards.org/cgi-bin/carddisp.pl?gene=SERPINF1
ANKH	ANKH Inorganic Pyrophosphate Transport Regulator	Protein Coding	40	GC05M014706	4.67	https://www.genecards.org/cgi-bin/carddisp.pl?gene=ANKH
ARMS2	Age-Related Maculopathy Susceptibility 2	Protein Coding	30	GC10P122454	4.62	https://www.genecards.org/cgi-bin/carddisp.pl?gene=ARMS2
RNF31	Ring Finger Protein 31	Protein Coding	41	GC14P024146	4.62	https://www.genecards.org/cgi-bin/carddisp.pl?gene=RNF31
IL1RL2	Interleukin 1 Receptor Like 2	Protein Coding	41	GC02P102186	4.61	https://www.genecards.org/cgi-bin/carddisp.pl?gene=IL1RL2
FGF19	Fibroblast Growth Factor 19	Protein Coding	44	GC11M069699	4.58	https://www.genecards.org/cgi-bin/carddisp.pl?gene=FGF19
CRBN	Cereblon	Protein Coding	43	GC03M003144	4.55	https://www.genecards.org/cgi-bin/carddisp.pl?gene=CRBN
ANGPT2	Angiopoietin 2	Protein Coding	44	GC08M006499	4.54	https://www.genecards.org/cgi-bin/carddisp.pl?gene=ANGPT2
EIF2AK3	Eukaryotic Translation Initiation Factor 2 Alpha Kinase 3	Protein Coding	48	GC02M088637	4.52	https://www.genecards.org/cgi-bin/carddisp.pl?gene=EIF2AK3
CD160	CD160 Molecule	Protein Coding	39	GC01P145719	4.51	https://www.genecards.org/cgi-bin/carddisp.pl?gene=CD160
CCNA2	Cyclin A2	Protein Coding	44	GC04M121816	4.49	https://www.genecards.org/cgi-bin/carddisp.pl?gene=CCNA2
SHARPIN	SHANK Associated RH Domain Interactor	Protein Coding	40	GC08M144098	4.49	https://www.genecards.org/cgi-bin/carddisp.pl?gene=SHARPIN
CCL25	C-C Motif Chemokine Ligand 25	Protein Coding	39	GC19P008117	4.47	https://www.genecards.org/cgi-bin/carddisp.pl?gene=CCL25
NOTCH2	Notch Receptor 2	Protein Coding	50	GC01M119911	4.46	https://www.genecards.org/cgi-bin/carddisp.pl?gene=NOTCH2
NR1I2	Nuclear Receptor Subfamily 1 Group I Member 2	Protein Coding	45	GC03P119780	4.45	https://www.genecards.org/cgi-bin/carddisp.pl?gene=NR1I2
DUSP5	Dual Specificity Phosphatase 5	Protein Coding	41	GC10P110497	4.43	https://www.genecards.org/cgi-bin/carddisp.pl?gene=DUSP5
KIR2DS5	Killer Cell Immunoglobulin Like Receptor, Two Ig Domains And Short Cytoplasmic Tail 5	Protein Coding	23	GC19Mr00079	4.41	https://www.genecards.org/cgi-bin/carddisp.pl?gene=KIR2DS5
AKR1B1	Aldo-Keto Reductase Family 1 Member B	Protein Coding	47	GC07M134442	4.41	https://www.genecards.org/cgi-bin/carddisp.pl?gene=AKR1B1
FEN1	Flap Structure-Specific Endonuclease 1	Protein Coding	46	GC11P061811	4.41	https://www.genecards.org/cgi-bin/carddisp.pl?gene=FEN1
KIR2DL2	Killer Cell Immunoglobulin Like Receptor, Two Ig Domains And Long Cytoplasmic Tail 2	Protein Coding	23	GC19Mr00108	4.4	https://www.genecards.org/cgi-bin/carddisp.pl?gene=KIR2DL2
SRP72	Signal Recognition Particle 72	Protein Coding	40	GC04P056466	4.4	https://www.genecards.org/cgi-bin/carddisp.pl?gene=SRP72
RPE65	Retinoid Isomerohydrolase RPE65	Protein Coding	44	GC01M068428	4.4	https://www.genecards.org/cgi-bin/carddisp.pl?gene=RPE65
IRF2	Interferon Regulatory Factor 2	Protein Coding	43	GC04M184387	4.39	https://www.genecards.org/cgi-bin/carddisp.pl?gene=IRF2
PARP1	Poly(ADP-Ribose) Polymerase 1	Protein Coding	49	GC01M226360	4.34	https://www.genecards.org/cgi-bin/carddisp.pl?gene=PARP1
HSPA1A	Heat Shock Protein Family A (Hsp70) Member 1A	Protein Coding	43	GC06P047326	4.34	https://www.genecards.org/cgi-bin/carddisp.pl?gene=HSPA1A
ATP8B1	ATPase Phospholipid Transporting 8B1	Protein Coding	40	GC18M057646	4.31	https://www.genecards.org/cgi-bin/carddisp.pl?gene=ATP8B1
UBR4	Ubiquitin Protein Ligase E3 Component N-Recognin 4	Protein Coding	39	GC01M019074	4.3	https://www.genecards.org/cgi-bin/carddisp.pl?gene=UBR4
CDKN3	Cyclin Dependent Kinase Inhibitor 3	Protein Coding	42	GC14P054398	4.29	https://www.genecards.org/cgi-bin/carddisp.pl?gene=CDKN3
RETN	Resistin	Protein Coding	43	GC19P007669	4.27	https://www.genecards.org/cgi-bin/carddisp.pl?gene=RETN
CEBPB	CCAAT Enhancer Binding Protein Beta	Protein Coding	43	GC20P050190	4.27	https://www.genecards.org/cgi-bin/carddisp.pl?gene=CEBPB
SSB	Small RNA Binding Exonuclease Protection Factor La	Protein Coding	42	GC02P169791	4.24	https://www.genecards.org/cgi-bin/carddisp.pl?gene=SSB
SYP	Synaptophysin	Protein Coding	43	GC0XM049187	4.24	https://www.genecards.org/cgi-bin/carddisp.pl?gene=SYP
VTCN1	V-Set Domain Containing T Cell Activation Inhibitor 1	Protein Coding	40	GC01M117143	4.24	https://www.genecards.org/cgi-bin/carddisp.pl?gene=VTCN1
CYP2B6	Cytochrome P450 Family 2 Subfamily B Member 6	Protein Coding	47	GC19P040991	4.23	https://www.genecards.org/cgi-bin/carddisp.pl?gene=CYP2B6
CACNA1F	Calcium Voltage-Gated Channel Subunit Alpha1 F	Protein Coding	45	GC0XM049205	4.23	https://www.genecards.org/cgi-bin/carddisp.pl?gene=CACNA1F
LPAR6	Lysophosphatidic Acid Receptor 6	Protein Coding	45	GC13M048389	4.21	https://www.genecards.org/cgi-bin/carddisp.pl?gene=LPAR6
RANBP2	RAN Binding Protein 2	Protein Coding	45	GC02P108719	4.21	https://www.genecards.org/cgi-bin/carddisp.pl?gene=RANBP2
CD200	CD200 Molecule	Protein Coding	39	GC03P112332	4.19	https://www.genecards.org/cgi-bin/carddisp.pl?gene=CD200
GC	GC Vitamin D Binding Protein	Protein Coding	43	GC04M071741	4.18	https://www.genecards.org/cgi-bin/carddisp.pl?gene=GC
PNMA2	PNMA Family Member 2	Protein Coding	36	GC08M026504	4.17	https://www.genecards.org/cgi-bin/carddisp.pl?gene=PNMA2
ABCC2	ATP Binding Cassette Subfamily C Member 2	Protein Coding	47	GC10P099782	4.16	https://www.genecards.org/cgi-bin/carddisp.pl?gene=ABCC2
DCAF8	DDB1 And CUL4 Associated Factor 8	Protein Coding	38	GC01M160215	4.14	https://www.genecards.org/cgi-bin/carddisp.pl?gene=DCAF8
CCNG1	Cyclin G1	Protein Coding	42	GC05P163438	4.13	https://www.genecards.org/cgi-bin/carddisp.pl?gene=CCNG1
DDX1	DEAD-Box Helicase 1	Protein Coding	43	GC02P015591	4.1	https://www.genecards.org/cgi-bin/carddisp.pl?gene=DDX1
LIG3	DNA Ligase 3	Protein Coding	44	GC17P034980	4.1	https://www.genecards.org/cgi-bin/carddisp.pl?gene=LIG3
TRIB2	Tribbles Pseudokinase 2	Protein Coding	37	GC02P012706	4.1	https://www.genecards.org/cgi-bin/carddisp.pl?gene=TRIB2
ASPRV1	Aspartic Peptidase Retroviral Like 1	Protein Coding	34	GC02M069960	4.09	https://www.genecards.org/cgi-bin/carddisp.pl?gene=ASPRV1
IL1RL1	Interleukin 1 Receptor Like 1	Protein Coding	41	GC02P102294	4.04	https://www.genecards.org/cgi-bin/carddisp.pl?gene=IL1RL1
PLA2G7	Phospholipase A2 Group VII	Protein Coding	50	GC06M046704	4.03	https://www.genecards.org/cgi-bin/carddisp.pl?gene=PLA2G7
CCNB1	Cyclin B1	Protein Coding	47	GC05P069167	3.99	https://www.genecards.org/cgi-bin/carddisp.pl?gene=CCNB1
COL11A1	Collagen Type XI Alpha 1 Chain	Protein Coding	43	GC01M102876	3.99	https://www.genecards.org/cgi-bin/carddisp.pl?gene=COL11A1
MIR139	MicroRNA 139	RNA Gene	19	GC11M072615	3.97	https://www.genecards.org/cgi-bin/carddisp.pl?gene=MIR139
E2F1	E2F Transcription Factor 1	Protein Coding	43	GC20M033675	3.96	https://www.genecards.org/cgi-bin/carddisp.pl?gene=E2F1
GGT3P	Gamma-Glutamyltransferase 3 Pseudogene	Pseudogene	18	GC22M018773	3.95	https://www.genecards.org/cgi-bin/carddisp.pl?gene=GGT3P
CCAT1	Colon Cancer Associated Transcript 1	RNA Gene	14	GC08M127207	3.93	https://www.genecards.org/cgi-bin/carddisp.pl?gene=CCAT1
GGT2	Gamma-Glutamyltransferase 2	Protein Coding	31	GC22M021207	3.93	https://www.genecards.org/cgi-bin/carddisp.pl?gene=GGT2
KIR3DS1	Killer Cell Immunoglobulin Like Receptor, Three Ig Domains And Short Cytoplasmic Tail 1	Protein Coding	21	GC19MR00058	3.9	https://www.genecards.org/cgi-bin/carddisp.pl?gene=KIR3DS1
RBL1	RB Transcriptional Corepressor Like 1	Protein Coding	41	GC20M036996	3.88	https://www.genecards.org/cgi-bin/carddisp.pl?gene=RBL1
MAPK9	Mitogen-Activated Protein Kinase 9	Protein Coding	48	GC05M180234	3.82	https://www.genecards.org/cgi-bin/carddisp.pl?gene=MAPK9
DCT	Dopachrome Tautomerase	Protein Coding	41	GC13M094436	3.82	https://www.genecards.org/cgi-bin/carddisp.pl?gene=DCT
AHI1	Abelson Helper Integration Site 1	Protein Coding	41	GC06M135283	3.8	https://www.genecards.org/cgi-bin/carddisp.pl?gene=AHI1
TRAF5	TNF Receptor Associated Factor 5	Protein Coding	42	GC01P211326	3.79	https://www.genecards.org/cgi-bin/carddisp.pl?gene=TRAF5
NR1H2	Nuclear Receptor Subfamily 1 Group H Member 2	Protein Coding	48	GC19P050329	3.78	https://www.genecards.org/cgi-bin/carddisp.pl?gene=NR1H2
FOXO1	Forkhead Box O1	Protein Coding	48	GC13M040555	3.77	https://www.genecards.org/cgi-bin/carddisp.pl?gene=FOXO1
PLAUR	Plasminogen Activator, Urokinase Receptor	Protein Coding	44	GC19M043646	3.73	https://www.genecards.org/cgi-bin/carddisp.pl?gene=PLAUR
CCNT1	Cyclin T1	Protein Coding	41	GC12M048688	3.72	https://www.genecards.org/cgi-bin/carddisp.pl?gene=CCNT1
CCNE1	Cyclin E1	Protein Coding	48	GC19P029811	3.7	https://www.genecards.org/cgi-bin/carddisp.pl?gene=CCNE1
PSIP1	PC4 And SFRS1 Interacting Protein 1	Protein Coding	39	GC09M015456	3.7	https://www.genecards.org/cgi-bin/carddisp.pl?gene=PSIP1
AOC3	Amine Oxidase Copper Containing 3	Protein Coding	44	GC17P042851	3.69	https://www.genecards.org/cgi-bin/carddisp.pl?gene=AOC3
ZNF354A	Zinc Finger Protein 354A	Protein Coding	37	GC05M178711	3.68	https://www.genecards.org/cgi-bin/carddisp.pl?gene=ZNF354A
LMOD1	Leiomodin 1	Protein Coding	40	GC01M201896	3.67	https://www.genecards.org/cgi-bin/carddisp.pl?gene=LMOD1
BGN	Biglycan	Protein Coding	43	GC0XP153494	3.67	https://www.genecards.org/cgi-bin/carddisp.pl?gene=BGN
PIPOX	Pipecolic Acid And Sarcosine Oxidase	Protein Coding	39	GC17P028951	3.66	https://www.genecards.org/cgi-bin/carddisp.pl?gene=PIPOX
USP50	Ubiquitin Specific Peptidase 50	Protein Coding	33	GC15M050496	3.66	https://www.genecards.org/cgi-bin/carddisp.pl?gene=USP50
FRG2C	FSHD Region Gene 2 Family Member C	Protein Coding	24	GC03P075646	3.66	https://www.genecards.org/cgi-bin/carddisp.pl?gene=FRG2C
PTPMT1	Protein Tyrosine Phosphatase Mitochondrial 1	Protein Coding	37	GC11P047568	3.66	https://www.genecards.org/cgi-bin/carddisp.pl?gene=PTPMT1
MCM7	Minichromosome Maintenance Complex Component 7	Protein Coding	44	GC07M100092	3.65	https://www.genecards.org/cgi-bin/carddisp.pl?gene=MCM7
DPP6	Dipeptidyl Peptidase Like 6	Protein Coding	43	GC07P153748	3.65	https://www.genecards.org/cgi-bin/carddisp.pl?gene=DPP6
ESX1	ESX Homeobox 1	Protein Coding	32	GC0XM104250	3.65	https://www.genecards.org/cgi-bin/carddisp.pl?gene=ESX1
GGTLC3	Gamma-Glutamyltransferase Light Chain Family Member 3	Protein Coding	20	GC22M018516	3.65	https://www.genecards.org/cgi-bin/carddisp.pl?gene=GGTLC3
EPGN	Epithelial Mitogen	Protein Coding	34	GC04P074309	3.65	https://www.genecards.org/cgi-bin/carddisp.pl?gene=EPGN
CRYAB	Crystallin Alpha B	Protein Coding	45	GC11M111908	3.63	https://www.genecards.org/cgi-bin/carddisp.pl?gene=CRYAB
EZR	Ezrin	Protein Coding	45	GC06M158765	3.63	https://www.genecards.org/cgi-bin/carddisp.pl?gene=EZR
PACRG	Parkin Coregulated	Protein Coding	37	GC06P162727	3.63	https://www.genecards.org/cgi-bin/carddisp.pl?gene=PACRG
PRRT2	Proline Rich Transmembrane Protein 2	Protein Coding	39	GC16P029811	3.6	https://www.genecards.org/cgi-bin/carddisp.pl?gene=PRRT2
IVNS1ABP	Influenza Virus NS1A Binding Protein	Protein Coding	39	GC01M185295	3.6	https://www.genecards.org/cgi-bin/carddisp.pl?gene=IVNS1ABP
SLC10A1	Solute Carrier Family 10 Member 1	Protein Coding	43	GC14M069775	3.59	https://www.genecards.org/cgi-bin/carddisp.pl?gene=SLC10A1
AGTR1	Angiotensin II Receptor Type 1	Protein Coding	51	GC03P148697	3.59	https://www.genecards.org/cgi-bin/carddisp.pl?gene=AGTR1
RECQL	RecQ Like Helicase	Protein Coding	41	GC12M021468	3.58	https://www.genecards.org/cgi-bin/carddisp.pl?gene=RECQL
SULT2A1	Sulfotransferase Family 2A Member 1	Protein Coding	44	GC19M047870	3.57	https://www.genecards.org/cgi-bin/carddisp.pl?gene=SULT2A1
COCH	Cochlin	Protein Coding	42	GC14P030874	3.56	https://www.genecards.org/cgi-bin/carddisp.pl?gene=COCH
NLRP6	NLR Family Pyrin Domain Containing 6	Protein Coding	38	GC11P000269	3.54	https://www.genecards.org/cgi-bin/carddisp.pl?gene=NLRP6
MAOA	Monoamine Oxidase A	Protein Coding	50	GC0XP043654	3.54	https://www.genecards.org/cgi-bin/carddisp.pl?gene=MAOA
TBP	TATA-Box Binding Protein	Protein Coding	48	GC06P170554	3.52	https://www.genecards.org/cgi-bin/carddisp.pl?gene=TBP
CNR1	Cannabinoid Receptor 1	Protein Coding	46	GC06M088139	3.5	https://www.genecards.org/cgi-bin/carddisp.pl?gene=CNR1
RBBP8	RB Binding Protein 8, Endonuclease	Protein Coding	44	GC18P022798	3.48	https://www.genecards.org/cgi-bin/carddisp.pl?gene=RBBP8
ARL3	ADP Ribosylation Factor Like GTPase 3	Protein Coding	44	GC10M102673	3.48	https://www.genecards.org/cgi-bin/carddisp.pl?gene=ARL3
TGIF1	TGFB Induced Factor Homeobox 1	Protein Coding	45	GC18P003411	3.47	https://www.genecards.org/cgi-bin/carddisp.pl?gene=TGIF1
GALK1	Galactokinase 1	Protein Coding	48	GC17M075751	3.45	https://www.genecards.org/cgi-bin/carddisp.pl?gene=GALK1
SUV39H1	Suppressor Of Variegation 3-9 Homolog 1	Protein Coding	43	GC0XP048698	3.45	https://www.genecards.org/cgi-bin/carddisp.pl?gene=SUV39H1
CD200R1	CD200 Receptor 1	Protein Coding	40	GC03M112921	3.44	https://www.genecards.org/cgi-bin/carddisp.pl?gene=CD200R1
SLC10A2	Solute Carrier Family 10 Member 2	Protein Coding	43	GC13M103043	3.42	https://www.genecards.org/cgi-bin/carddisp.pl?gene=SLC10A2
MMP8	Matrix Metallopeptidase 8	Protein Coding	47	GC11M102617	3.41	https://www.genecards.org/cgi-bin/carddisp.pl?gene=MMP8
FANCC	FA Complementation Group C	Protein Coding	47	GC09M095099	3.41	https://www.genecards.org/cgi-bin/carddisp.pl?gene=FANCC
CHIA	Chitinase Acidic	Protein Coding	42	GC01P111291	3.41	https://www.genecards.org/cgi-bin/carddisp.pl?gene=CHIA
MATN3	Matrilin 3	Protein Coding	43	GC02M019992	3.4	https://www.genecards.org/cgi-bin/carddisp.pl?gene=MATN3
MATN1	Matrilin 1	Protein Coding	39	GC01M030711	3.39	https://www.genecards.org/cgi-bin/carddisp.pl?gene=MATN1
BLZF1	Basic Leucine Zipper Nuclear Factor 1	Protein Coding	39	GC01P169367	3.38	https://www.genecards.org/cgi-bin/carddisp.pl?gene=BLZF1
VCL	Vinculin	Protein Coding	47	GC10P073995	3.36	https://www.genecards.org/cgi-bin/carddisp.pl?gene=VCL
ICMT	Isoprenylcysteine Carboxyl Methyltransferase	Protein Coding	41	GC01M006222	3.36	https://www.genecards.org/cgi-bin/carddisp.pl?gene=ICMT
RMI2	RecQ Mediated Genome Instability 2	Protein Coding	33	GC16P011250	3.35	https://www.genecards.org/cgi-bin/carddisp.pl?gene=RMI2
HECTD4	HECT Domain E3 Ubiquitin Protein Ligase 4	Protein Coding	31	GC12M112160	3.34	https://www.genecards.org/cgi-bin/carddisp.pl?gene=HECTD4
BANCR	BRAF-Activated Non-Protein Coding RNA	RNA Gene	12	GC09M069296	3.34	https://www.genecards.org/cgi-bin/carddisp.pl?gene=BANCR
RBBP5	RB Binding Protein 5, Histone Lysine Methyltransferase Complex Subunit	Protein Coding	39	GC01M205055	3.32	https://www.genecards.org/cgi-bin/carddisp.pl?gene=RBBP5
RECQL5	RecQ Like Helicase 5	Protein Coding	39	GC17M075626	3.32	https://www.genecards.org/cgi-bin/carddisp.pl?gene=RECQL5
RMI1	RecQ Mediated Genome Instability 1	Protein Coding	37	GC09P083980	3.32	https://www.genecards.org/cgi-bin/carddisp.pl?gene=RMI1
POLD4	DNA Polymerase Delta 4, Accessory Subunit	Protein Coding	37	GC11M067350	3.32	https://www.genecards.org/cgi-bin/carddisp.pl?gene=POLD4
WDR11	WD Repeat Domain 11	Protein Coding	37	GC10P120851	3.32	https://www.genecards.org/cgi-bin/carddisp.pl?gene=WDR11
KIR2DL5A	Killer Cell Immunoglobulin Like Receptor, Two Ig Domains And Long Cytoplasmic Tail 5A	Protein Coding	22	GC19MR00046	3.31	https://www.genecards.org/cgi-bin/carddisp.pl?gene=KIR2DL5A
UBTF	Upstream Binding Transcription Factor	Protein Coding	42	GC17M044205	3.3	https://www.genecards.org/cgi-bin/carddisp.pl?gene=UBTF
PROCR	Protein C Receptor	Protein Coding	42	GC20P035182	3.3	https://www.genecards.org/cgi-bin/carddisp.pl?gene=PROCR
HLA-DQB2	Major Histocompatibility Complex, Class II, DQ Beta 2	Protein Coding	36	GC06M032756	3.3	https://www.genecards.org/cgi-bin/carddisp.pl?gene=HLA-DQB2
NAGLU	N-Acetyl-Alpha-Glucosaminidase	Protein Coding	43	GC17P042535	3.29	https://www.genecards.org/cgi-bin/carddisp.pl?gene=NAGLU
ARRB1	Arrestin Beta 1	Protein Coding	43	GC11M075261	3.25	https://www.genecards.org/cgi-bin/carddisp.pl?gene=ARRB1
CCDC88B	Coiled-Coil Domain Containing 88B	Protein Coding	33	GC11P064340	3.21	https://www.genecards.org/cgi-bin/carddisp.pl?gene=CCDC88B
E2F2	E2F Transcription Factor 2	Protein Coding	42	GC01M023527	3.21	https://www.genecards.org/cgi-bin/carddisp.pl?gene=E2F2
GPBAR1	G Protein-Coupled Bile Acid Receptor 1	Protein Coding	39	GC02P218259	3.2	https://www.genecards.org/cgi-bin/carddisp.pl?gene=GPBAR1
NPHP1	Nephrocystin 1	Protein Coding	43	GC02M110122	3.19	https://www.genecards.org/cgi-bin/carddisp.pl?gene=NPHP1
NPHP4	Nephrocystin 4	Protein Coding	40	GC01M005863	3.19	https://www.genecards.org/cgi-bin/carddisp.pl?gene=NPHP4
HSP90AB1	Heat Shock Protein 90 Alpha Family Class B Member 1	Protein Coding	45	GC06P044246	3.17	https://www.genecards.org/cgi-bin/carddisp.pl?gene=HSP90AB1
NR0B2	Nuclear Receptor Subfamily 0 Group B Member 2	Protein Coding	43	GC01M026922	3.17	https://www.genecards.org/cgi-bin/carddisp.pl?gene=NR0B2
E2F3	E2F Transcription Factor 3	Protein Coding	43	GC06P020402	3.16	https://www.genecards.org/cgi-bin/carddisp.pl?gene=E2F3
MLLT1	MLLT1 Super Elongation Complex Subunit	Protein Coding	39	GC19M006210	3.16	https://www.genecards.org/cgi-bin/carddisp.pl?gene=MLLT1
MBD1	Methyl-CpG Binding Domain Protein 1	Protein Coding	40	GC18M050266	3.15	https://www.genecards.org/cgi-bin/carddisp.pl?gene=MBD1
CCNE2	Cyclin E2	Protein Coding	41	GC08M094879	3.15	https://www.genecards.org/cgi-bin/carddisp.pl?gene=CCNE2
SCTR	Secretin Receptor	Protein Coding	41	GC02M119439	3.14	https://www.genecards.org/cgi-bin/carddisp.pl?gene=SCTR
UBE2N	Ubiquitin Conjugating Enzyme E2 N	Protein Coding	47	GC12M093406	3.14	https://www.genecards.org/cgi-bin/carddisp.pl?gene=UBE2N
TYRP1	Tyrosinase Related Protein 1	Protein Coding	46	GC09P012683	3.07	https://www.genecards.org/cgi-bin/carddisp.pl?gene=TYRP1
SOCS2	Suppressor Of Cytokine Signaling 2	Protein Coding	43	GC12P093569	3	https://www.genecards.org/cgi-bin/carddisp.pl?gene=SOCS2
HEXB	Hexosaminidase Subunit Beta	Protein Coding	47	GC05P074640	2.96	https://www.genecards.org/cgi-bin/carddisp.pl?gene=HEXB
MIR503	MicroRNA 503	RNA Gene	17	GC0XM134626	2.94	https://www.genecards.org/cgi-bin/carddisp.pl?gene=MIR503
SLC35B2	Solute Carrier Family 35 Member B2	Protein Coding	39	GC06M044254	2.93	https://www.genecards.org/cgi-bin/carddisp.pl?gene=SLC35B2
CCDC122	Coiled-Coil Domain Containing 122	Protein Coding	31	GC13M043823	2.92	https://www.genecards.org/cgi-bin/carddisp.pl?gene=CCDC122
TSBP1-AS1	TSBP1 And BTNL2 Antisense RNA 1	RNA Gene	9	GC06P049132	2.92	https://www.genecards.org/cgi-bin/carddisp.pl?gene=TSBP1-AS1
LOC107988021	IKBKG Recombination Region	Biological Region	1	GC0XP154556	2.91	https://www.genecards.org/cgi-bin/carddisp.pl?gene=LOC107988021
LOC107988022	IKBKG Downstream Recombination Region	Biological Region	1	GC0XP154568	2.91	https://www.genecards.org/cgi-bin/carddisp.pl?gene=LOC107988022
BEST1	Bestrophin 1	Protein Coding	43	GC11P061949	2.9	https://www.genecards.org/cgi-bin/carddisp.pl?gene=BEST1
AFF2	AF4/FMR2 Family Member 2	Protein Coding	41	GC0XP148500	2.89	https://www.genecards.org/cgi-bin/carddisp.pl?gene=AFF2
CYP8B1	Cytochrome P450 Family 8 Subfamily B Member 1	Protein Coding	40	GC03M042856	2.89	https://www.genecards.org/cgi-bin/carddisp.pl?gene=CYP8B1
SLC51A	Solute Carrier Family 51 Subunit Alpha	Protein Coding	37	GC03P196211	2.89	https://www.genecards.org/cgi-bin/carddisp.pl?gene=SLC51A
C21orf91	Chromosome 21 Open Reading Frame 91	Protein Coding	35	GC21M017788	2.89	https://www.genecards.org/cgi-bin/carddisp.pl?gene=C21orf91
IGLON5	IgLON Family Member 5	Protein Coding	33	GC19P051311	2.89	https://www.genecards.org/cgi-bin/carddisp.pl?gene=IGLON5
BDNF-AS	BDNF Antisense RNA	RNA Gene	18	GC11P027513	2.89	https://www.genecards.org/cgi-bin/carddisp.pl?gene=BDNF-AS
MIR498	MicroRNA 498	RNA Gene	16	GC19P054606	2.89	https://www.genecards.org/cgi-bin/carddisp.pl?gene=MIR498
SNORA59A	Small Nucleolar RNA, H/ACA Box 59A	RNA Gene	16	GC01P012508	2.89	https://www.genecards.org/cgi-bin/carddisp.pl?gene=SNORA59A
LOC107988024	IKBKGP1 Recombination Region	Biological Region	1	GC0XP154646	2.89	https://www.genecards.org/cgi-bin/carddisp.pl?gene=LOC107988024
LOC107988025	IKBKGP1 Upstream Recombination Region	Biological Region	1	GC0XP154634	2.89	https://www.genecards.org/cgi-bin/carddisp.pl?gene=LOC107988025
ACTC1	Actin Alpha Cardiac Muscle 1	Protein Coding	42	GC15M034788	2.88	https://www.genecards.org/cgi-bin/carddisp.pl?gene=ACTC1
TNFSF18	TNF Superfamily Member 18	Protein Coding	38	GC01M173009	2.88	https://www.genecards.org/cgi-bin/carddisp.pl?gene=TNFSF18
TIGIT	T Cell Immunoreceptor With Ig And ITIM Domains	Protein Coding	36	GC03P114276	2.86	https://www.genecards.org/cgi-bin/carddisp.pl?gene=TIGIT
VCAN	Versican	Protein Coding	47	GC05P083471	2.86	https://www.genecards.org/cgi-bin/carddisp.pl?gene=VCAN
FLNB	Filamin B	Protein Coding	45	GC03P058008	2.81	https://www.genecards.org/cgi-bin/carddisp.pl?gene=FLNB
HSPB1	Heat Shock Protein Family B (Small) Member 1	Protein Coding	51	GC07P076302	2.77	https://www.genecards.org/cgi-bin/carddisp.pl?gene=HSPB1
ITLN1	Intelectin 1	Protein Coding	39	GC01M160876	2.76	https://www.genecards.org/cgi-bin/carddisp.pl?gene=ITLN1
HSPA1L	Heat Shock Protein Family A (Hsp70) Member 1 Like	Protein Coding	43	GC06M031809	2.76	https://www.genecards.org/cgi-bin/carddisp.pl?gene=HSPA1L
RAB23	RAB23, Member RAS Oncogene Family	Protein Coding	43	GC06M057187	2.67	https://www.genecards.org/cgi-bin/carddisp.pl?gene=RAB23
IFN1@	Interferon, Type 1, Cluster	Gene Cluster	4	GC09U990039	2.64	https://www.genecards.org/cgi-bin/carddisp.pl?gene=IFN1%40
GAL	Galanin And GMAP Prepropeptide	Protein Coding	44	GC11P068684	2.64	https://www.genecards.org/cgi-bin/carddisp.pl?gene=GAL
ZMPSTE24	Zinc Metallopeptidase STE24	Protein Coding	43	GC01P040258	2.59	https://www.genecards.org/cgi-bin/carddisp.pl?gene=ZMPSTE24
HSPA8	Heat Shock Protein Family A (Hsp70) Member 8	Protein Coding	47	GC11M123057	2.58	https://www.genecards.org/cgi-bin/carddisp.pl?gene=HSPA8
IL1F10	Interleukin 1 Family Member 10	Protein Coding	39	GC02P113067	2.56	https://www.genecards.org/cgi-bin/carddisp.pl?gene=IL1F10
COL6A1	Collagen Type VI Alpha 1 Chain	Protein Coding	43	GC21P045981	2.52	https://www.genecards.org/cgi-bin/carddisp.pl?gene=COL6A1
FANCG	FA Complementation Group G	Protein Coding	43	GC09M035073	2.5	https://www.genecards.org/cgi-bin/carddisp.pl?gene=FANCG
ADORA3	Adenosine A3 Receptor	Protein Coding	45	GC01M111499	2.49	https://www.genecards.org/cgi-bin/carddisp.pl?gene=ADORA3
LAT2	Linker For Activation Of T Cells Family Member 2	Protein Coding	39	GC07P074199	2.49	https://www.genecards.org/cgi-bin/carddisp.pl?gene=LAT2
DHCR7	7-Dehydrocholesterol Reductase	Protein Coding	46	GC11M071428	2.48	https://www.genecards.org/cgi-bin/carddisp.pl?gene=DHCR7
UBASH3B	Ubiquitin Associated And SH3 Domain Containing B	Protein Coding	40	GC11P122655	2.48	https://www.genecards.org/cgi-bin/carddisp.pl?gene=UBASH3B
MDH2	Malate Dehydrogenase 2	Protein Coding	48	GC07P076048	2.47	https://www.genecards.org/cgi-bin/carddisp.pl?gene=MDH2
ARPC4	Actin Related Protein 2/3 Complex Subunit 4	Protein Coding	38	GC03P009792	2.44	https://www.genecards.org/cgi-bin/carddisp.pl?gene=ARPC4
CASP7	Caspase 7	Protein Coding	50	GC10P113679	2.43	https://www.genecards.org/cgi-bin/carddisp.pl?gene=CASP7
ANTXR2	ANTXR Cell Adhesion Molecule 2	Protein Coding	47	GC04M079901	2.43	https://www.genecards.org/cgi-bin/carddisp.pl?gene=ANTXR2
HLA-S	Major Histocompatibility Complex, Class I, S (Pseudogene)	Pseudogene	7	GC06M031381	2.42	https://www.genecards.org/cgi-bin/carddisp.pl?gene=HLA-S
GTF2IRD1	GTF2I Repeat Domain Containing 1	Protein Coding	42	GC07P074461	2.42	https://www.genecards.org/cgi-bin/carddisp.pl?gene=GTF2IRD1
LINC00328	Long Intergenic Non-Protein Coding RNA 328	RNA Gene	9	GC21U900445	2.39	https://www.genecards.org/cgi-bin/carddisp.pl?gene=LINC00328
SMAD2	SMAD Family Member 2	Protein Coding	47	GC18M047809	2.38	https://www.genecards.org/cgi-bin/carddisp.pl?gene=SMAD2
NAMPT	Nicotinamide Phosphoribosyltransferase	Protein Coding	48	GC07M106248	2.37	https://www.genecards.org/cgi-bin/carddisp.pl?gene=NAMPT
CNGA3	Cyclic Nucleotide Gated Channel Subunit Alpha 3	Protein Coding	43	GC02P098329	2.36	https://www.genecards.org/cgi-bin/carddisp.pl?gene=CNGA3
CKB	Creatine Kinase B	Protein Coding	45	GC14M103519	2.35	https://www.genecards.org/cgi-bin/carddisp.pl?gene=CKB
SCIMP	SLP Adaptor And CSK Interacting Membrane Protein	Protein Coding	31	GC17M005208	2.33	https://www.genecards.org/cgi-bin/carddisp.pl?gene=SCIMP
PSMD2	Proteasome 26S Subunit, Non-ATPase 2	Protein Coding	43	GC03P184298	2.31	https://www.genecards.org/cgi-bin/carddisp.pl?gene=PSMD2
CRB1	Crumbs Cell Polarity Complex Component 1	Protein Coding	43	GC01P197170	2.31	https://www.genecards.org/cgi-bin/carddisp.pl?gene=CRB1
GSDMD	Gasdermin D	Protein Coding	39	GC08P143553	2.29	https://www.genecards.org/cgi-bin/carddisp.pl?gene=GSDMD
PDIA3	Protein Disulfide Isomerase Family A Member 3	Protein Coding	44	GC15P043746	2.28	https://www.genecards.org/cgi-bin/carddisp.pl?gene=PDIA3
ADAD1	Adenosine Deaminase Domain Containing 1	Protein Coding	36	GC04P122378	2.26	https://www.genecards.org/cgi-bin/carddisp.pl?gene=ADAD1
ESD	Esterase D	Protein Coding	44	GC13M046771	2.22	https://www.genecards.org/cgi-bin/carddisp.pl?gene=ESD
UBE2D1	Ubiquitin Conjugating Enzyme E2 D1	Protein Coding	45	GC10P058334	2.2	https://www.genecards.org/cgi-bin/carddisp.pl?gene=UBE2D1
NARS1	Asparaginyl-TRNA Synthetase 1	Protein Coding	34	GC18M057601	2.19	https://www.genecards.org/cgi-bin/carddisp.pl?gene=NARS1
MKI67	Marker Of Proliferation Ki-67	Protein Coding	44	GC10M128096	2.19	https://www.genecards.org/cgi-bin/carddisp.pl?gene=MKI67
RPGRIP1L	RPGRIP1 Like	Protein Coding	39	GC16M053597	2.18	https://www.genecards.org/cgi-bin/carddisp.pl?gene=RPGRIP1L
INHBA	Inhibin Subunit Beta A	Protein Coding	45	GC07M041668	2.18	https://www.genecards.org/cgi-bin/carddisp.pl?gene=INHBA
AIF1	Allograft Inflammatory Factor 1	Protein Coding	39	GC06P047304	2.18	https://www.genecards.org/cgi-bin/carddisp.pl?gene=AIF1
SERPINB9	Serpin Family B Member 9	Protein Coding	39	GC06M002887	2.1	https://www.genecards.org/cgi-bin/carddisp.pl?gene=SERPINB9
DEFB106A	Defensin Beta 106A	Protein Coding	27	GC08P007825	2.06	https://www.genecards.org/cgi-bin/carddisp.pl?gene=DEFB106A
PTGER3	Prostaglandin E Receptor 3	Protein Coding	46	GC01M070852	2.03	https://www.genecards.org/cgi-bin/carddisp.pl?gene=PTGER3
TAF1	TATA-Box Binding Protein Associated Factor 1	Protein Coding	45	GC0XP071366	2.01	https://www.genecards.org/cgi-bin/carddisp.pl?gene=TAF1
PRPH2	Peripherin 2	Protein Coding	39	GC06M043145	2	https://www.genecards.org/cgi-bin/carddisp.pl?gene=PRPH2
KCNMA1	Potassium Calcium-Activated Channel Subfamily M Alpha 1	Protein Coding	49	GC10M076869	2	https://www.genecards.org/cgi-bin/carddisp.pl?gene=KCNMA1
KIF21B	Kinesin Family Member 21B	Protein Coding	35	GC01M200938	1.98	https://www.genecards.org/cgi-bin/carddisp.pl?gene=KIF21B
PDGFRL	Platelet Derived Growth Factor Receptor Like	Protein Coding	41	GC08P017576	1.98	https://www.genecards.org/cgi-bin/carddisp.pl?gene=PDGFRL
EYS	Eyes Shut Homolog	Protein Coding	36	GC06M063719	1.95	https://www.genecards.org/cgi-bin/carddisp.pl?gene=EYS
S100A1	S100 Calcium Binding Protein A1	Protein Coding	41	GC01P153627	1.95	https://www.genecards.org/cgi-bin/carddisp.pl?gene=S100A1
ELF1	E74 Like ETS Transcription Factor 1	Protein Coding	41	GC13M040932	1.94	https://www.genecards.org/cgi-bin/carddisp.pl?gene=ELF1
GPX1	Glutathione Peroxidase 1	Protein Coding	48	GC03M049368	1.92	https://www.genecards.org/cgi-bin/carddisp.pl?gene=GPX1
UBE2D3	Ubiquitin Conjugating Enzyme E2 D3	Protein Coding	47	GC04M102794	1.92	https://www.genecards.org/cgi-bin/carddisp.pl?gene=UBE2D3
ACR	Acrosin	Protein Coding	38	GC22P050738	1.89	https://www.genecards.org/cgi-bin/carddisp.pl?gene=ACR
CDH5	Cadherin 5	Protein Coding	47	GC16P066366	1.89	https://www.genecards.org/cgi-bin/carddisp.pl?gene=CDH5
RCVRN	Recoverin	Protein Coding	38	GC17M009896	1.85	https://www.genecards.org/cgi-bin/carddisp.pl?gene=RCVRN
CASP5	Caspase 5	Protein Coding	44	GC11M104995	1.84	https://www.genecards.org/cgi-bin/carddisp.pl?gene=CASP5
ANXA11	Annexin A11	Protein Coding	44	GC10M080150	1.84	https://www.genecards.org/cgi-bin/carddisp.pl?gene=ANXA11
PRDX4	Peroxiredoxin 4	Protein Coding	43	GC0XP023665	1.83	https://www.genecards.org/cgi-bin/carddisp.pl?gene=PRDX4
ACAN	Aggrecan	Protein Coding	45	GC15P088813	1.82	https://www.genecards.org/cgi-bin/carddisp.pl?gene=ACAN
PRPF8	Pre-MRNA Processing Factor 8	Protein Coding	41	GC17M001650	1.82	https://www.genecards.org/cgi-bin/carddisp.pl?gene=PRPF8
RHAG	Rh Associated Glycoprotein	Protein Coding	44	GC06M049605	1.77	https://www.genecards.org/cgi-bin/carddisp.pl?gene=RHAG
CASP2	Caspase 2	Protein Coding	49	GC07P144979	1.73	https://www.genecards.org/cgi-bin/carddisp.pl?gene=CASP2
CYP2C9	Cytochrome P450 Family 2 Subfamily C Member 9	Protein Coding	48	GC10P094938	1.72	https://www.genecards.org/cgi-bin/carddisp.pl?gene=CYP2C9
HNRNPH3	Heterogeneous Nuclear Ribonucleoprotein H3	Protein Coding	39	GC10P068331	1.71	https://www.genecards.org/cgi-bin/carddisp.pl?gene=HNRNPH3
MAOB	Monoamine Oxidase B	Protein Coding	43	GC0XM043766	1.7	https://www.genecards.org/cgi-bin/carddisp.pl?gene=MAOB
SOCS5	Suppressor Of Cytokine Signaling 5	Protein Coding	41	GC02P046698	1.68	https://www.genecards.org/cgi-bin/carddisp.pl?gene=SOCS5
ATF1	Activating Transcription Factor 1	Protein Coding	46	GC12P050763	1.65	https://www.genecards.org/cgi-bin/carddisp.pl?gene=ATF1
NLRP7	NLR Family Pyrin Domain Containing 7	Protein Coding	43	GC19M054923	1.6	https://www.genecards.org/cgi-bin/carddisp.pl?gene=NLRP7
RPGRIP1	RPGR Interacting Protein 1	Protein Coding	40	GC14P021290	1.58	https://www.genecards.org/cgi-bin/carddisp.pl?gene=RPGRIP1
MRGPRX2	MAS Related GPR Family Member X2	Protein Coding	37	GC11M019077	1.57	https://www.genecards.org/cgi-bin/carddisp.pl?gene=MRGPRX2
PRPF31	Pre-MRNA Processing Factor 31	Protein Coding	42	GC19P055363	1.57	https://www.genecards.org/cgi-bin/carddisp.pl?gene=PRPF31
RBBP6	RB Binding Protein 6, Ubiquitin Ligase	Protein Coding	39	GC16P024537	1.56	https://www.genecards.org/cgi-bin/carddisp.pl?gene=RBBP6
RPGR	Retinitis Pigmentosa GTPase Regulator	Protein Coding	40	GC0XM038269	1.56	https://www.genecards.org/cgi-bin/carddisp.pl?gene=RPGR
KIF4A	Kinesin Family Member 4A	Protein Coding	40	GC0XP070290	1.56	https://www.genecards.org/cgi-bin/carddisp.pl?gene=KIF4A
KIR2DP1	Killer Cell Immunoglobulin Like Receptor, Two Ig Domains Pseudogene 1	Pseudogene	9	GC19P055436	1.53	https://www.genecards.org/cgi-bin/carddisp.pl?gene=KIR2DP1
RUNX3	RUNX Family Transcription Factor 3	Protein Coding	43	GC01M024899	1.53	https://www.genecards.org/cgi-bin/carddisp.pl?gene=RUNX3
UBE2R2	Ubiquitin Conjugating Enzyme E2 R2	Protein Coding	44	GC09P033817	1.53	https://www.genecards.org/cgi-bin/carddisp.pl?gene=UBE2R2
GHRHR	Growth Hormone Releasing Hormone Receptor	Protein Coding	43	GC07P030978	1.48	https://www.genecards.org/cgi-bin/carddisp.pl?gene=GHRHR
ANO6	Anoctamin 6	Protein Coding	39	GC12P045215	1.47	https://www.genecards.org/cgi-bin/carddisp.pl?gene=ANO6
S1PR3	Sphingosine-1-Phosphate Receptor 3	Protein Coding	44	GC09P088991	1.44	https://www.genecards.org/cgi-bin/carddisp.pl?gene=S1PR3
SLC12A1	Solute Carrier Family 12 Member 1	Protein Coding	46	GC15P048191	1.43	https://www.genecards.org/cgi-bin/carddisp.pl?gene=SLC12A1
COTL1	Coactosin Like F-Actin Binding Protein 1	Protein Coding	40	GC16M084566	1.43	https://www.genecards.org/cgi-bin/carddisp.pl?gene=COTL1
NRL	Neural Retina Leucine Zipper	Protein Coding	41	GC14M024078	1.41	https://www.genecards.org/cgi-bin/carddisp.pl?gene=NRL
KRT12	Keratin 12	Protein Coding	39	GC17M040861	1.39	https://www.genecards.org/cgi-bin/carddisp.pl?gene=KRT12
YBX3	Y-Box Binding Protein 3	Protein Coding	39	GC12M013875	1.38	https://www.genecards.org/cgi-bin/carddisp.pl?gene=YBX3
SELENBP1	Selenium Binding Protein 1	Protein Coding	43	GC01M151364	1.35	https://www.genecards.org/cgi-bin/carddisp.pl?gene=SELENBP1
UCHL1	Ubiquitin C-Terminal Hydrolase L1	Protein Coding	51	GC04P041256	1.34	https://www.genecards.org/cgi-bin/carddisp.pl?gene=UCHL1
KRT3	Keratin 3	Protein Coding	39	GC12M052789	1.33	https://www.genecards.org/cgi-bin/carddisp.pl?gene=KRT3
DHDDS	Dehydrodolichyl Diphosphate Synthase Subunit	Protein Coding	43	GC01P026432	1.33	https://www.genecards.org/cgi-bin/carddisp.pl?gene=DHDDS
CRYBB1	Crystallin Beta B1	Protein Coding	39	GC22M026599	1.32	https://www.genecards.org/cgi-bin/carddisp.pl?gene=CRYBB1
ANXA3	Annexin A3	Protein Coding	42	GC04P078551	1.3	https://www.genecards.org/cgi-bin/carddisp.pl?gene=ANXA3
VEGFB	Vascular Endothelial Growth Factor B	Protein Coding	44	GC11P064234	1.3	https://www.genecards.org/cgi-bin/carddisp.pl?gene=VEGFB
GLMN	Glomulin, FKBP Associated Protein	Protein Coding	40	GC01M092246	1.29	https://www.genecards.org/cgi-bin/carddisp.pl?gene=GLMN
P4HB	Prolyl 4-Hydroxylase Subunit Beta	Protein Coding	49	GC17M081843	1.27	https://www.genecards.org/cgi-bin/carddisp.pl?gene=P4HB
B3GNT2	UDP-GlcNAc:BetaGal Beta-1,3-N-Acetylglucosaminyltransferase 2	Protein Coding	40	GC02P062196	1.27	https://www.genecards.org/cgi-bin/carddisp.pl?gene=B3GNT2
SUPV3L1	Suv3 Like RNA Helicase	Protein Coding	37	GC10P069182	1.26	https://www.genecards.org/cgi-bin/carddisp.pl?gene=SUPV3L1
CARD10	Caspase Recruitment Domain Family Member 10	Protein Coding	40	GC22M045384	1.25	https://www.genecards.org/cgi-bin/carddisp.pl?gene=CARD10
MBTPS1	Membrane Bound Transcription Factor Peptidase, Site 1	Protein Coding	43	GC16M084053	1.25	https://www.genecards.org/cgi-bin/carddisp.pl?gene=MBTPS1
ARID4A	AT-Rich Interaction Domain 4A	Protein Coding	37	GC14P058298	1.25	https://www.genecards.org/cgi-bin/carddisp.pl?gene=ARID4A
TYMS	Thymidylate Synthetase	Protein Coding	47	GC18P000657	1.24	https://www.genecards.org/cgi-bin/carddisp.pl?gene=TYMS
ABCA4	ATP Binding Cassette Subfamily A Member 4	Protein Coding	44	GC01M093992	1.23	https://www.genecards.org/cgi-bin/carddisp.pl?gene=ABCA4
RBL2	RB Transcriptional Corepressor Like 2	Protein Coding	43	GC16P053433	1.23	https://www.genecards.org/cgi-bin/carddisp.pl?gene=RBL2
PRDX2	Peroxiredoxin 2	Protein Coding	46	GC19M012796	1.23	https://www.genecards.org/cgi-bin/carddisp.pl?gene=PRDX2
CRX	Cone-Rod Homeobox	Protein Coding	43	GC19P047819	1.22	https://www.genecards.org/cgi-bin/carddisp.pl?gene=CRX
PLOD3	Procollagen-Lysine,2-Oxoglutarate 5-Dioxygenase 3	Protein Coding	45	GC07M101205	1.22	https://www.genecards.org/cgi-bin/carddisp.pl?gene=PLOD3
SERPINB5	Serpin Family B Member 5	Protein Coding	43	GC18P063476	1.21	https://www.genecards.org/cgi-bin/carddisp.pl?gene=SERPINB5
NYX	Nyctalopin	Protein Coding	38	GC0XP041447	1.2	https://www.genecards.org/cgi-bin/carddisp.pl?gene=NYX
IMPG2	Interphotoreceptor Matrix Proteoglycan 2	Protein Coding	38	GC03M101222	1.2	https://www.genecards.org/cgi-bin/carddisp.pl?gene=IMPG2
PET100	PET100 Cytochrome C Oxidase Chaperone	Protein Coding	31	GC19P007630	1.2	https://www.genecards.org/cgi-bin/carddisp.pl?gene=PET100
ARID4B	AT-Rich Interaction Domain 4B	Protein Coding	37	GC01M235133	1.2	https://www.genecards.org/cgi-bin/carddisp.pl?gene=ARID4B
MDM4	MDM4 Regulator Of P53	Protein Coding	43	GC01P204516	1.19	https://www.genecards.org/cgi-bin/carddisp.pl?gene=MDM4
CDK3	Cyclin Dependent Kinase 3	Protein Coding	40	GC17P076007	1.19	https://www.genecards.org/cgi-bin/carddisp.pl?gene=CDK3
KIF14	Kinesin Family Member 14	Protein Coding	39	GC01M200521	1.19	https://www.genecards.org/cgi-bin/carddisp.pl?gene=KIF14
COL9A3	Collagen Type IX Alpha 3 Chain	Protein Coding	42	GC20P062816	1.18	https://www.genecards.org/cgi-bin/carddisp.pl?gene=COL9A3
KDM5A	Lysine Demethylase 5A	Protein Coding	41	GC12M000280	1.18	https://www.genecards.org/cgi-bin/carddisp.pl?gene=KDM5A
TECPR1	Tectonin Beta-Propeller Repeat Containing 1	Protein Coding	33	GC07M098214	1.18	https://www.genecards.org/cgi-bin/carddisp.pl?gene=TECPR1
CDIPT	CDP-Diacylglycerol--Inositol 3-Phosphatidyltransferase	Protein Coding	41	GC16M029874	1.18	https://www.genecards.org/cgi-bin/carddisp.pl?gene=CDIPT
ATF7	Activating Transcription Factor 7	Protein Coding	40	GC12M053522	1.18	https://www.genecards.org/cgi-bin/carddisp.pl?gene=ATF7
H1-5	H1.5 Linker Histone, Cluster Member	Protein Coding	32	GC06M028364	1.18	https://www.genecards.org/cgi-bin/carddisp.pl?gene=H1-5
E2F4	E2F Transcription Factor 4	Protein Coding	45	GC16P067192	1.18	https://www.genecards.org/cgi-bin/carddisp.pl?gene=E2F4
PLEKHA7	Pleckstrin Homology Domain Containing A7	Protein Coding	38	GC11M016778	1.18	https://www.genecards.org/cgi-bin/carddisp.pl?gene=PLEKHA7
ASMT	Acetylserotonin O-Methyltransferase	Protein Coding	38	GC0XP001595	1.11	https://www.genecards.org/cgi-bin/carddisp.pl?gene=ASMT
SYNJ2BP	Synaptojanin 2 Binding Protein	Protein Coding	37	GC14M070366	1.11	https://www.genecards.org/cgi-bin/carddisp.pl?gene=SYNJ2BP
MIR196A2	MicroRNA 196a-2	RNA Gene	21	GC12P054200	1.05	https://www.genecards.org/cgi-bin/carddisp.pl?gene=MIR196A2
POMGNT1	Protein O-Linked Mannose N-Acetylglucosaminyltransferase 1 (Beta 1,2-)	Protein Coding	45	GC01M046188	1.05	https://www.genecards.org/cgi-bin/carddisp.pl?gene=POMGNT1
EFHD1	EF-Hand Domain Family Member D1	Protein Coding	36	GC02P232606	1.04	https://www.genecards.org/cgi-bin/carddisp.pl?gene=EFHD1
MFRP	Membrane Frizzled-Related Protein	Protein Coding	33	GC11M119339	1.03	https://www.genecards.org/cgi-bin/carddisp.pl?gene=MFRP
KDM5B	Lysine Demethylase 5B	Protein Coding	43	GC01M202696	1.02	https://www.genecards.org/cgi-bin/carddisp.pl?gene=KDM5B
E2F5	E2F Transcription Factor 5	Protein Coding	40	GC08P085177	1.02	https://www.genecards.org/cgi-bin/carddisp.pl?gene=E2F5
TFDP1	Transcription Factor Dp-1	Protein Coding	44	GC13P113584	1.01	https://www.genecards.org/cgi-bin/carddisp.pl?gene=TFDP1
PCMTD1	Protein-L-Isoaspartate (D-Aspartate) O-Methyltransferase Domain Containing 1	Protein Coding	36	GC08M051817	1.01	https://www.genecards.org/cgi-bin/carddisp.pl?gene=PCMTD1
P2RY6	Pyrimidinergic Receptor P2Y6	Protein Coding	42	GC11P073264	1.01	https://www.genecards.org/cgi-bin/carddisp.pl?gene=P2RY6
NR2E3	Nuclear Receptor Subfamily 2 Group E Member 3	Protein Coding	41	GC15P071792	1	https://www.genecards.org/cgi-bin/carddisp.pl?gene=NR2E3
MIR492	MicroRNA 492	RNA Gene	18	GC12P094834	0.97	https://www.genecards.org/cgi-bin/carddisp.pl?gene=MIR492
MIR513A1	MicroRNA 513a-1	RNA Gene	14	GC0XM147213	0.96	https://www.genecards.org/cgi-bin/carddisp.pl?gene=MIR513A1
MIR513A2	MicroRNA 513a-2	RNA Gene	13	GC0XM147225	0.96	https://www.genecards.org/cgi-bin/carddisp.pl?gene=MIR513A2
GJC1	Gap Junction Protein Gamma 1	Protein Coding	42	GC17M044800	0.96	https://www.genecards.org/cgi-bin/carddisp.pl?gene=GJC1
PRDM2	PR/SET Domain 2	Protein Coding	40	GC01P013702	0.96	https://www.genecards.org/cgi-bin/carddisp.pl?gene=PRDM2
SERF2	Small EDRK-Rich Factor 2	Protein Coding	35	GC15P043777	0.96	https://www.genecards.org/cgi-bin/carddisp.pl?gene=SERF2
IMPG1	Interphotoreceptor Matrix Proteoglycan 1	Protein Coding	39	GC06M075921	0.95	https://www.genecards.org/cgi-bin/carddisp.pl?gene=IMPG1
TFDP2	Transcription Factor Dp-2	Protein Coding	39	GC03M141944	0.95	https://www.genecards.org/cgi-bin/carddisp.pl?gene=TFDP2
MIR34B	MicroRNA 34b	RNA Gene	21	GC11P111546	0.95	https://www.genecards.org/cgi-bin/carddisp.pl?gene=MIR34B
CAPZB	Capping Actin Protein Of Muscle Z-Line Subunit Beta	Protein Coding	40	GC01M019339	0.94	https://www.genecards.org/cgi-bin/carddisp.pl?gene=CAPZB
DFFA	DNA Fragmentation Factor Subunit Alpha	Protein Coding	45	GC01M010456	0.94	https://www.genecards.org/cgi-bin/carddisp.pl?gene=DFFA
SCG2	Secretogranin II	Protein Coding	39	GC02M223596	0.86	https://www.genecards.org/cgi-bin/carddisp.pl?gene=SCG2
RP9	RP9 Pre-MRNA Splicing Factor	Protein Coding	37	GC07M033094	0.84	https://www.genecards.org/cgi-bin/carddisp.pl?gene=RP9
PDE6G	Phosphodiesterase 6G	Protein Coding	44	GC17M081650	0.81	https://www.genecards.org/cgi-bin/carddisp.pl?gene=PDE6G
TRIM39-RPP21	TRIM39-RPP21 Readthrough	Protein Coding	21	GC06P047277	0.78	https://www.genecards.org/cgi-bin/carddisp.pl?gene=TRIM39-RPP21
ARHGEF18	Rho/Rac Guanine Nucleotide Exchange Factor 18	Protein Coding	43	GC19P007351	0.76	https://www.genecards.org/cgi-bin/carddisp.pl?gene=ARHGEF18
PDC	Phosducin	Protein Coding	37	GC01M186412	0.71	https://www.genecards.org/cgi-bin/carddisp.pl?gene=PDC
MROH3P	Maestro Heat Like Repeat Family Member 3, Pseudogene	Pseudogene	10	GC01P200920	0.65	https://www.genecards.org/cgi-bin/carddisp.pl?gene=MROH3P
RDH5	Retinol Dehydrogenase 5	Protein Coding	46	GC12P055720	0.59	https://www.genecards.org/cgi-bin/carddisp.pl?gene=RDH5
TSBP1	Testis Expressed Basic Protein 1	Protein Coding	23	GC06M032288	0.55	https://www.genecards.org/cgi-bin/carddisp.pl?gene=TSBP1
TMEM17	Transmembrane Protein 17	Protein Coding	31	GC02M062447	0.5	https://www.genecards.org/cgi-bin/carddisp.pl?gene=TMEM17
DHFRP2	Dihydrofolate Reductase Pseudogene 2	Pseudogene	11	GC06M032542	0.5	https://www.genecards.org/cgi-bin/carddisp.pl?gene=DHFRP2
TTF2	Transcription Termination Factor 2	Protein Coding	39	GC01P117060	0.46	https://www.genecards.org/cgi-bin/carddisp.pl?gene=TTF2
SCAF11	SR-Related CTD Associated Factor 11	Protein Coding	33	GC12M045919	0.38	https://www.genecards.org/cgi-bin/carddisp.pl?gene=SCAF11
COL8A1	Collagen Type VIII Alpha 1 Chain	Protein Coding	39	GC03P099638	0.21	https://www.genecards.org/cgi-bin/carddisp.pl?gene=COL8A1
